# Supplementary material for: Reengineering the programming of a functional domain of an iterative highly reducing polyketide synthase
Source: Royal Society of Chemistry journal article supplement (doi:10.1039/d0ra04026f), 2020-01-01
Supplement: d0ra04026f1.pdf [file d0ra04026f1.pdf]

## **Reengineering the Programming of a Functional Domain of an Iterative Highly Reducing Polyketide Synthase**

Oliver Piech, and Russell J. Cox\*

BMWZ and Institute for Organic Chemistry, Leibniz Universität Hannover, Schneiderberg  
38, 30167, Hannover, Germany

russell.cox@oci.uni-hannover.de

### **Electronic Supplementary Information**

|            |                                                                           |    |
|------------|---------------------------------------------------------------------------|----|
| <b>1.0</b> | Multiple alignment of SQTKS vs related sequences                          | 2  |
| <b>2.0</b> | Model Building and Docking                                                | 6  |
| <b>3.0</b> | General Methods and Equipment                                             | 26 |
| <b>4.0</b> | Preparation and Purification of WT and mutant ER proteins and their assay | 29 |
| <b>5.0</b> | Synthesis of Pantetheine Substrates                                       | 33 |
| <b>6.0</b> | References                                                                | 50 |

# 1.0 Multiple alignment of SQTCS vs vertebrate FAS and other PKS

## 1.1 Alignment with Type I FAS and PKS for determination of approximate domain boundaries

|                 |     |                                                                                     |    |     |
|-----------------|-----|-------------------------------------------------------------------------------------|----|-----|
|                 |     | KS                                                                                  | KS |     |
| <u>MF SQTCS</u> | 1   | MVPYHQASSCESNTMTAMDEYQHHDATIP IAIIGMSCRFPGNATSPEKLWELCAEGRSAWSKIPKSRFRQEGFYNPNA     |    | 80  |
| <u>C2 SQTCS</u> | 1   | MVPYQPASSCGSNTMAAMDEHQHNDATIP IAIIGMSCRFPGNATSPEKLWELCAQGRSAWSSIPKSRFRQEGFYNPNA     |    | 80  |
| <u>MFAS</u>     | 1   | ME-----EVIAGMSGKLPSE--NLQEFWANLIGGVDVMTD--DDRRWKAGLYGL--P                           |    | 48  |
| <u>PFAS</u>     | 1   | ME-----EVIAGMSGKLPSE--NLEEFWANLIGGVDVMTA--DDRRWKAGLYGL--P                           |    | 48  |
| <u>TENS</u>     | 1   | MSPMKQNESESHS-----VSEPIAIVGSAYRFPGCCNTPSKLWDLQPPRDLKELDPERLNLRRYYHPDG               |    | 66  |
|                 |     | KS                                                                                  | KS |     |
| <u>MF SQTCS</u> | 81  | ERVGTSHVVGGHF--LEEDPSLFDASFFNLSAEAAKTMDPQFRLQLESVYEAMESAGITLLEHIAGSDTSYVAGACFRDYHD  |    | 159 |
| <u>C2 SQTCS</u> | 81  | ERVGTSHVVGGHF--LEEDPSLFDASFFNLSAEAAKTMDPQFRLQLESVYEAMESAGITLLEHIAGSDTSYVAGACFRDYHD  |    | 159 |
| <u>MFAS</u>     | 49  | KRSGKL-----KDLSKFDASFFGVHPKQAHMTDPQLRLLLEVSYEAIVDGGINPASLRGTNTGVVWVSGSEASE          |    | 118 |
| <u>PFAS</u>     | 49  | RRMGLK-----KDLSRFDASFFGVHKSQANTMDPQLRMLLEVYEAIVDGGINPASLRGTSTGVVWVSSSDASE           |    | 118 |
| <u>TENS</u>     | 67  | ETHGSTDVSNKAYTLEEDISRFDASFFGISPLEAASMDPQRTLLEVYESTETAGIPLDKLRGSLTSVHVGVMTDWAQ       |    | 146 |
|                 |     | KS                                                                                  | KS |     |
| <u>MF SQTCS</u> | 160 | SLVRDPDLVPRFLLTGNGAAMSSNRISYFYDLHGASMTVDTGCSTLTLTALHLACQGLRNRESKTSIVTGANVILNPDMPFV  |    | 239 |
| <u>C2 SQTCS</u> | 160 | SLVRDPDLVPRFLLTGNGAAMSSNRVSHFYDLRGASMTVDTGCSTLTLTALHLACQGLRNRESKTSIVTGANVILNPDMPFV  |    | 239 |
| <u>MFAS</u>     | 119 | ALS RDPETLLGYSMVGCQRAMMANRLSFFDFKGPSIALDTACSSSLALQONAYQAIRSGECPAALVGGINLLKPKNTSV    |    | 198 |
| <u>PFAS</u>     | 119 | ALS RDPETLVGYSMIGCQRAMMANRLSFFDFKGPSITLDTACSSSLALQONAYQAIRGGECSAAVVGGNLVLLKPNSSL    |    | 198 |
| <u>TENS</u>     | 147 | VQRDPETMPQYATGIASSIISNRISYIFDLKGASMTLDTACSSSLVALHNAARALQSGDCEKAIIVAGVNLILLDPDFI     |    | 226 |
|                 |     | KS                                                                                  | KS |     |
| <u>MF SQTCS</u> | 240 | TMSSLGLLGPGEKSHTFDARANGYGRGEGIATVIIKRDLDEALAAQDPIRCIIRGTALNQDG--KTATLTPSPQTAQSDLIR  |    | 318 |
| <u>C2 SQTCS</u> | 240 | TMSSLGLLGPGEKSHTFDARANGYGRGEGIATVIIKRDLDEALAAQDPIRCIIRGTALNQDG--RTATLTPSPQTAQSDLIR  |    | 318 |
| <u>MFAS</u>     | 199 | QFMKLGMLSPDGTCSRFDSSGSGYCRSEAVAVLLTKKSLARR---VYATILNAGTNTDGSKEQGVTFPSGEVQQLIC       |    | 274 |
| <u>PFAS</u>     | 199 | QFMKLGMLSDQGTCSRFDAGTGYCRAEAVAVLLTKKSLARR---VYATILNAGTNTDGSKEQGVTFPSGDVQQLIR        |    | 274 |
| <u>TENS</u>     | 227 | YESKLHMLSPDARSRMWDAANGYARGEGAAVVLKTLGHALRDGRIEIVRSTFVNSDG--LSSGLTPSSAAQATLIR        |    | 305 |
|                 |     | KS                                                                                  | KS |     |
| <u>MF SQTCS</u> | 319 | ACYRAAALDP--NDTAFLLAAHGTGTRTDAVEIAAAAEVF-----GEKRLDRPLWIGSLKTNIGHSEATSGLASV         |    | 387 |
| <u>C2 SQTCS</u> | 319 | ACYRAAALDP--NDTAFLLAAHGTGTRTDAVEIAAAADV-----GEKRSRPERLWIGSVKTNIGHSEATSGLASV         |    | 387 |
| <u>MFAS</u>     | 275 | SLYQAPAGLAP--ESLEYIEAHGTGTVKVDQPELNGITRSL-----CAFR--QAPLLIGSTKSNMGMHPEPASGLAAL      |    | 341 |
| <u>PFAS</u>     | 275 | SLYAPAGLPP--ESLEYIEAHGTGTVKVDQPELNGIVNAL-----CATR--REPLLIGSTKSNMGMHPEPASGVAAL       |    | 341 |
| <u>TENS</u>     | 306 | QTYRKAGLDPVDRPQPFECGTGTRAGDPVEARAI SDAFLPSHRTNGGGAATTVDPLVYVGSIKTVVGHLEGCAGLAGL     |    | 385 |
|                 |     | KS                                                                                  | KS |     |
| <u>MF SQTCS</u> | 388 | IQAALALEKGLIPPNI NFKEPNEKLSQVSSAVKVPSTLEKWP--LGSVRRASVNNFGYGGANAHVILESGLTGSGTQLAN   |    | 465 |
| <u>C2 SQTCS</u> | 388 | IQAALALEKGLIPPNI NFKEPNEKLGQVSAAVRVPSNLQKWP--SVSGVRRASVNNFGYGGANAHVILESGIPGHTPIAN   |    | 465 |
| <u>MFAS</u>     | 342 | TKVLLSLEHGWWAPNLHFHNPNP---EIPALLDGRQLQVDRP--LPVIRGNNVGINVSGFGGNSNVHVLQ---PNTRQAPA   |    | 413 |
| <u>PFAS</u>     | 342 | IKVLLSLEHGWWAPNLHYHTPNP---EIPALDQGRQLQVDRP--LPVIRGNNVGINVSGFGGNSNVHVLQ---PNSRPAPP   |    | 413 |
| <u>TENS</u>     | 386 | VKVLSSLKHGIIPPNLWFDKLNPEIARYYGLQIPTKAIPWPELAPGTPLRASVNSVFGFGGTNAHA IIER--YDASQSYCS  |    | 464 |
|                 |     | KS                                                                                  | KS |     |
| <u>MF SQTCS</u> | 466 | GNGHYETNGTNGHKGANGTNGHKGANGTNGHNGTNGITNGHDI TRGTIDYEPLESFVISLSAKEEAGTRSMNTNLGE      |    | 545 |
| <u>C2 SQTCS</u> | 466 | GSGR--SNGTNGHNGANGTNGHNGTNGTNGHFDATQATNGHYGTDETPDYAPLDSFVISISAKEEASARSMVNLAD        |    | 543 |
| <u>MFAS</u>     | 414 | PTAH-----AALPHLLHASGRTL-----E                                                       |    | 432 |
| <u>PFAS</u>     | 414 | PAQH-----AALPRLQLASGRTL-----E                                                       |    | 432 |
| <u>TENS</u>     | 465 | QWRRDMTEKTIARTQNNDDVEIPVPLVLTAKTGGALWRTVDAY--AQHLRQHPKLR--VANLSQFMHSRRSTRVRA--      |    | 538 |
|                 |     | AT                                                                                  | AT |     |
| <u>MF SQTCS</u> | 546 | YLRKNHVDDETKHFKSIAHTLGSHRSTFKWTAAPKITSLEELLAAGGGQFQASRALERTRLGFVFTGQGAQWFAMGREL     |    | 625 |
| <u>C2 SQTCS</u> | 544 | YLRTLQVQDETKHFKSIAHTLGSHRSMFKWTAAKSITGPEELIAAAGGGQFQASRALERTRLGFVFTGQGAQWFAMGREL    |    | 623 |
| <u>MFAS</u>     | 433 | AVQDL--LEQGRQHSQDLAFVSMNLNDIAATPTAAMPFRGYTVLGVGRVQEVQVSTNKR--LWFI CSGMGTQWRMGMLSL   |    | 510 |
| <u>PFAS</u>     | 433 | AVQTL--LEQGLRHSRDLAFVGLMNEIAAVSPVAMPFRGYAVLGGAGSDEVQVQVPGSKRP--VWFI CSGMGAQWQMGMLSL |    | 510 |
| <u>TENS</u>     | 539 | ---SFGASREELVENMANFVQAHAADAKSPASQNRIGYSPLLIDPK-----EVSGILGIFTGQGAQWPMGRDM           |    | 605 |
|                 |     | AT                                                                                  | AT |     |
| <u>MF SQTCS</u> | 626 | INTYPVFRKSLDRANGYLKEFGCE---WSILDELSDAETS NVNDMTLSPPLCTAVQISLVRLLLESWGIVPTAVTGHSS    |    | 701 |
| <u>C2 SQTCS</u> | 624 | INTYPVFRQSLDRADRYLKEFGCE---WSI IDELSRDAENS NVNDMTLSPPLCTAVQISLVLQLESWGIVPTAVTGHSS   |    | 699 |
| <u>MFAS</u>     | 511 | MRL--DSFRESILRSDEAVKPLGVK-----VSDLLSLTDETRTDDIVHAFVSLTAIQIALIDLLTSVGLKPKDGTIGHSL    |    | 582 |
| <u>PFAS</u>     | 511 | MRL--DRFRDSILRSQALKPLGLR-----VSDLLSLTDEAVLDDIVSFFVSLTSIQIALIDLLTSVGLQPDGTIGHSL      |    | 582 |
| <u>TENS</u>     | 606 | MHQSPFRKTIADCESVLQALPLKADPAWSLSEELKKDASTSRLGEAEISQPLCTAVQIALVNVLTASGVYFDAVGHSS      |    | 685 |
|                 |     | AT                                                                                  | AT |     |
| <u>MF SQTCS</u> | 702 | GEIAAAYAAGALDFRSAMAVTYFRGEVGLACQDKIVGK---GGMIAVGLGPEEAED--RIARVQSGKIVVACINSQSSV     |    | 775 |
| <u>C2 SQTCS</u> | 700 | GEIAAAYAAGALDFKSAMAVTYFRGEVGLACQDKIVGK---GGMIAVGLGPEDAED--RIARVQSGKIVVACINSQSSV     |    | 773 |
| <u>MFAS</u>     | 583 | GEVACGYADGCLSQREAVLAAYWRGQ---CIKDAHLPP---GSMAAVGLSWECKQ--RCP---AGVVPACHNS EDTV      |    | 649 |
| <u>PFAS</u>     | 583 | GEVACGYADGCLTQEEAVLSSYWRGY---CIKEANVLP---GMAAVGLSWECKQ--RCP---PGIVPACHNSKDTV        |    | 649 |
| <u>TENS</u>     | 686 | GEIAATYASC IINLKAAMQIAYYRGL---YAKLARGQSDAEGMMAAGLSMDDAVKLCRLPEFE--GRIQVAASNAPQSV    |    | 760 |
|                 |     | AT                                                                                  | AT |     |
| <u>MF SQTCS</u> | 776 | TVSGDLAGIVELEELKAEGVFARRVKV--QAAYSHHMQVIANGYLTSLKDI---LK--PGKKFGE---IIYSSPTTGK--    |    | 845 |
| <u>C2 SQTCS</u> | 774 | TVSGDLSGIVELEEDLLKAEGVFARRVKV--QAAYSHHMQVIANGYLTSLKDM---LK--PTKKFGE---IIYSSPTTGR--  |    | 843 |
| <u>MFAS</u>     | 650 | TISGPQAAVNEFVEQLKQEGVFAKEVRTGGLAFHSYFMEGIAPTLLQALKKV---IREPRRSAR---WLSTSIPEAQ--     |    | 721 |
| <u>PFAS</u>     | 650 | TISGPQAAMSEFLQQLKREDVVFKEVRTGGIAFHSYFMESIAPTLRQLRKV---ILDPKPRSKR---WLSTSIPEAQ--     |    | 721 |
| <u>TENS</u>     | 761 | TLSGDKEAIIKAAKALDADGVFARELVK--DTAYSHHMLPCAEPYIKALLACDIQVSAPTKTPGRCKMWSVSRGDAELL     |    | 839 |
|                 |     | AT                                                                                  | AT |     |
| <u>MF SQTCS</u> | 846 | RETSAKLMASAQHWNNMLSPVRFASFQNMCFPTQKVSRSGELEQDQVDIILEVGPFGMLQGGPIQQMMSLPREFESARMPY   |    | 925 |
| <u>C2 SQTCS</u> | 844 | RETNAKLMASAQHWNNMLSPVRFASFQNMCFSSNRSSQSEEIFQDQVDIILEVGPFGMLQGGPIQQMMSLPFERARLPY     |    | 923 |
| <u>MFAS</u>     | 722 | WQSSLARTSSAEYVNNLVSPVLFQALWHI-----PEHAVVLEIAPHALLQAVLKRGVK-----SSCTI                |    | 781 |
| <u>PFAS</u>     | 722 | WQGLARTFSAEYSVNNLVSPVLFQALQHV-----PAHAVVVEIAPHALLQAVLKRSL-----SSCTI                 |    | 781 |
| <u>TENS</u>     | 840 | RRDRNLSLKGYPVWANNVQTVQFSRAIQSTIWHG-----GPFDLAVEVGPFPALKGPTQETLKA--VYGSAPLY          |    | 907 |

|                 |             |                                                                                     |             |
|-----------------|-------------|-------------------------------------------------------------------------------------|-------------|
|                 | <b>AT</b>   | <b>AT</b>                                                                           |             |
| <u>MF SOTKS</u> | 926         | LSCLLRGQSA-VYTMQSLAAGLMG-----WGYRVDMAA---VNFPGQTHGARILHDLPSPYWNHDNSHWWEPRLN         | 991         |
| <u>C2 SOTKS</u> | 924         | ISCLLRGQSA-VHTMQTVAAGLMG-----WGYRVDMAA---VNFPGQTYGVKILHDLPSPYWNHDNSHWWEPRLN         | 989         |
| <u>MFAS</u>     | 782         | IPLMKRDKHNDLEFPLTNLGVHL-----TGIVNPNALFPVVEFP-APRGTPPLIS--PHIKWDSQT-WDVPVAE          | 848         |
| <u>PFAS</u>     | 782         | IPLMKKDHNDLEFPLSNVGRHL-----AGVSNPNGLFPVVEFP-APRGTPPLIS--PHKXWDSQA-WDVPASA           | 848         |
| <u>TENS</u>     | 908         | TGVLRSRGAND-AVAFSTAIGNIWSHLGPAFVDITGYQSFSGTCE---GHGGSEAPFISDLPLYPDWHDDEEYWRRESRS    | 982         |
|                 | <b>DH</b>   | <b>DH</b>                                                                           |             |
| <u>MF SOTKS</u> | 992         | KAHRQRVHPHDLGSLIPGR-DLREPTWRHFIRVQDIPWIRDHVVSQQLVYPGAGFTCMAIEAMVQLHDLKDSQSKKIA      | 1070        |
| <u>C2 SOTKS</u> | 990         | KAHRQRVHPHDLGSLIVGR-DLREPTWRHFIRVQDIPWIRDHVVSQALVYPGAGFTCMAMEAMVQLHELSDSQRKVA       | 1068        |
| <u>MFAS</u>     | 849         | D-----FPNGSSSSSATVYSIDASPESPDHYLV-----DHCIDGRVIFPPGTGYLCLVWKTLLARSLGLSLEETPVV-      | 913         |
| <u>PFAS</u>     | 849         | D-----FPSGSSCSSVAVYKFVDSPEPDPHYLV-----DHCIDGRVIFPPGTGYLWLTWKTLLARALSQNLLEETPVV-     | 913         |
| <u>TENS</u>     | 983         | RRYRTGKDESHHELLGRMPDD-NEREIRWRNLLKVSELPWTQGHVRLGEVLLPGAAYSMAMAEAGR---LALDQGREVS     | 1058        |
|                 | <b>DH</b>   | <b>DH</b>                                                                           |             |
| <u>MF SOTKS</u> | 1071        | GYRLADVDILRAMLIPDTSEG-----LEAHISLRPCST--KLLLTNEWYDFCVSSVGEDDKFVDHCRGRIAVEFNT        | 1139        |
| <u>C2 SOTKS</u> | 1069        | GYRLAEVDILRAMLIPDTSEG-----LEAHISLRPCST--KLLLTNEWYDFCVSSVGGDDKFDVHCRGRITIEFDT        | 1137        |
| <u>MFAS</u>     | 914         | ---FENVSFHQATILPKTGTVA---LEVRLLLEASHAFEVSDT-GNLIVSGKVYLW---EDPNSKL-----FDH          | 971         |
| <u>PFAS</u>     | 914         | ---FEDVTLHQATILPKTGTVS---LEVRLLLEASHAFEVSDSNGSLIASGKVYQW---ESPDKL-----FDT           | 972         |
| <u>TENS</u>     | 1059        | LLEVSVDVILRPVVVADNKEGTETLFTVRLLEDEYASTGKKS-DLMTASFSFYIY---NSPASTSVHTCEGRIAVHLGA     | 1134        |
|                 | <b>DH</b>   | <b>DH</b>                                                                           |             |
| <u>MF SOTKS</u> | 1140        | SSLDAPAKTTSRE---RSRGAGLTRSVDPSNLYSFLRAQGIYHGSIFQ----NLKTISSRKNYSESSFVVADT---ASV     | 1208        |
| <u>C2 SOTKS</u> | 1138        | SGSADTPRTSLRE---RSRSTGLMRSVDPSNLYSFLRAQGIYHGPFIQ----NLKTISSRKHSESSFVVANT---ASV      | 1206        |
| <u>MFAS</u>     | 972         | PEVPTPPESASVS---R-----LTQGEVYKELRLRGYDYGPPQFQICEATLEGEQKLLWKNWVTFM---TMLQVSI        | 1039        |
| <u>PFAS</u>     | 973         | RAAVDPADSTAEF---R-----LSQGQVYKDLRLRGYDYGPPQFQVLVESDLEGNRGRQLQWNSWVSFTL---AMLHMSI    | 1040        |
| <u>TENS</u>     | 1135        | KLGEAAANSTPQLPPREPSVNLQQLDCEKLYSFEITGLYSGAFRRIV-----SSSLCGHATATASW                  | 1200        |
|                 | <b>DH</b>   | <b>DH</b>                                                                           |             |
| <u>MF SOTKS</u> | 1209        | MPDGFQSAHVHPTTL---SIFQGYALTALPSAGLDQ-KTAMIPRSIQEIYLSALTSEVQCLVSDTSLIRYDQGSFT-VNV    | 1286        |
| <u>C2 SOTKS</u> | 1207        | MPNGFQSPHVIHPTTL---SIFQGYALTALPGAGLDQ-KTAMIPRSIQEYLSALTSDVQCLVSDTSLIRYDQGSFT-VNV    | 1284        |
| <u>MFAS</u>     | 1040        | LGSSQSLQL---PTRVTAIY-----IDP-ATHR-----QKVYRLKEDTQVADVTTSRCLGITVSSGHIHSRLQT          | 1100        |
| <u>PFAS</u>     | 1041        | LAPQQLGLYL---PFRFTSIR-----IDP-VTHR-----QKLYTLQDTTQAADVVDNRNLTNVVAGGALFLGABS         | 1101        |
| <u>TENS</u>     | 1201        | PTADLNDCHLVHPAIL---VAFQTIIFVARAHPDSGQLSSALLPSRIERVRVPSLAMSGLQNNENFNAAI--DSWALNQTAS  | 1279        |
|                 | <b>DH</b>   | <b>DH</b>                                                                           | <b>CMeT</b> |
| <u>MF SOTKS</u> | 1287        | GISSK-----ADSEC-TPVLE-IGLNRQSVGQMAPQGGDSNNDLCKLEWALDISSVKQERLKEKFGPLDPAEADI I       | 1359        |
| <u>C2 SOTKS</u> | 1285        | DVSSK-----ADSEH-TPVLE-IGLNRQSVGQMAPQGGDSNNDLCKLDWAPDISSVKQERLKEKFGPLDPTIADI I       | 1357        |
| <u>MFAS</u>     | 1101        | TATSR-----RQEQLVPTLEKVFVTPHMAEAECLSESTALQKELQCKGLARALQTKATQQ-----                   | 1156        |
| <u>PFAS</u>     | 1102        | SVAPR-----RPQEHKLPILKFCFTHVESGCLAGNTALQELQLCRGLAQLQTKVAQQ-----                      | 1157        |
| <u>TENS</u>     | 1280        | SLTGNINVDADSER---ALIQVEGFVRAVG---EPDASKDRLLFYETVWGRDISIMGLSDPIRDE--TSDAMVQNL S      | 1350        |
|                 | <b>CMeT</b> | <b>CMeT</b>                                                                         | <b>CMeT</b> |
| <u>MF SOTKS</u> | 1360        | MGLRQACLYYIRQALTSITPSARDQLDWHQKRFYDWMMLQMHAEEDRLAPNSSAWLQCTSSDEQKLEENVRAASVNGQM     | 1439        |
| <u>C2 SOTKS</u> | 1358        | MGLRQACIHFIRHSLQSLTAPDRDQLDWHQKRFYDWMVLQIQLAEEDRLAPNSSAWLQCSSDEQKLEENVRASSVNGQM     | 1437        |
| <u>MFAS</u>     | 1157        | -GLKAA-----MLGQE-----DPPQHGL-----PRLAAACQLQLNGNL                                    | 1189        |
| <u>PFAS</u>     | 1158        | -GLKMV-----VPLDGAQAPREAPQOQL-----PRLAAACQLQLNGNL                                    | 1196        |
| <u>TENS</u>     | 1351        | EAIERVSLFYRQLMGELSTADRRQANWYHTRMLAAFPHHLLAKVHEETHLHLRPEWL-ADDWTVIQTIIEAYPDAVELQM    | 1429        |
|                 | <b>CMeT</b> | <b>CMeT</b>                                                                         | <b>CMeT</b> |
| <u>MF SOTKS</u> | 1440        | VVHVGESILAILRHEIAPLEMLQDKLLRYRYTDAIKWDRSYQQIDQLVKLHAHKCPSAKITIEIGACTGGCTRAVLDA L S  | 1519        |
| <u>C2 SOTKS</u> | 1438        | VVHVGKSMALAILRHEIAPLEMLQDKLLRYRYTDAIKWDRSYQQIDQLVKLHAHKCPTAKITIEIGACTGGCTRAVLDA L S | 1517        |
| <u>MFAS</u>     | 1190        | QLELGEAL-----AQERLLLPEDPLISGLLNSQALKACVD-----TALENLSTLKMVAEVLAGEGHLYSRIPALLN        | 1256        |
| <u>PFAS</u>     | 1197        | QLELQVQL-----AQERPLLCDDPLLSGLLDAPLAKACVD-----TALENMASPKMVAEVLAGEGQLYSRIPALLN        | 1263        |
| <u>TENS</u>     | 1430        | LHAVGQNVADVIRGKHLLEVLRRDNLDRLETDPKGMHMANLFLANALKEITFKFPRCKITIEIGACTGATWAAALSAITG    | 1509        |
|                 | <b>CMeT</b> | <b>CMeT</b>                                                                         | <b>CMeT</b> |
| <u>MF SOTKS</u> | 1520        | THGAARCAQYDFTDVSSGFEEAAQKQFATAFADVIRFQKLDIEKDIETQG-----FECGSYDLVIAASQVLHATGKIE      | 1590        |
| <u>C2 SOTKS</u> | 1518        | NQGIARCAQYDFTDVSSGFEEAAQKQFAAFDDVIRFQKLDIEKDIEMQG-----FECGSYDLVIAASQVLHATGKME       | 1588        |
| <u>MFAS</u>     | 1257        | TQPMQLQ-LEYTATDRHPQALKDVQTK-----LQHDVAQGWPNPAPSSLGALDLLVCNICALATLGDPA               | 1321        |
| <u>PFAS</u>     | 1264        | TQPVMQ-LDYTATDRNPQALEAAQAK-----LEQLHVTQGWDPANPAPGSLGKADLLVCNICALATLGDPA             | 1328        |
| <u>TENS</u>     | 1510        | EA---FDTYTYTDLVSVGFENAVERFSAFRHRMVFRLDIEKDPASQS-----FDLNSYDII IATNVLHATERNLG        | 1576        |
|                 | <b>CMeT</b> | <b>CMeT</b>                                                                         | <b>CMeT</b> |
| <u>MF SOTKS</u> | 1591        | DTMANVRRLLKPGGKLLL-VETTRDEMQLQVFLGLLPGWLLSSEERKMSPSLSTSSWEKVLKKTGFNGLDVELRDCDSD     | 1669        |
| <u>C2 SOTKS</u> | 1589        | HTMANVRRLLKPGGKLLL-VETTRDEMQLQVFLGLLPGWLLSSEERQMSPSLSTNSWEKVLKKTGFMDIELRDCDSD       | 1667        |
| <u>MFAS</u>     | 1322        | LALDNMVAALKKEG-FL- VHTVLRKHALGETLACLPS-----EVQPAPSLLSQEEWESLFSRKALHLVGLKR-----      | 1387        |
| <u>PFAS</u>     | 1329        | VAVGNMAATLKEG-FL-LHTLLAGHPLGEMVGLTS-----PEQGRHLLSQDQWESLFGASLHLVGLKR-----           | 1394        |
| <u>TENS</u>     | 1577        | VTLGNVRSLLKPGGYLLNEKTGPDLSRATFNFGLLEGWLLAEEKERQLSPLMSPDGWDAQKQAFSVDVHIVHDVQED       | 1656        |
|                 | <b>YKR</b>  | <b>YKR</b>                                                                          | <b>YKR</b>  |
| <u>MF SOTKS</u> | 1670        | Q-----FYSFVIMATASPTVPMNPVDFIILHGKSS-----IPDQWMDLRTATSPF-TKSD                        | 1720        |
| <u>C2 SOTKS</u> | 1668        | E-----FYSFVMMATASPTIASSMAFAIVYGEVP-----LPDQFLDDMKTATSSS-AVSD                        | 1718        |
| <u>MFAS</u>     | 1388        | S-----FYGTALFLCRR--IPQEKPIFLSVEDTSF-----QWVDSLKS-TLAT-SSSQ                          | 1432        |
| <u>PFAS</u>     | 1395        | S-----FYGSVFLFCRQ--TPQDSSVFLSVEDTSF-----RWVDSLKD-ILAD-ASSR                          | 1439        |
| <u>TENS</u>     | 1657        | QQDKQNSMIMSQAVDFFYARLSPLSEMANLLMNEPLLIIGGQTTATLTKMIKEIQKLLPRQWRHKVRLIASVNHLEAE      | 1736        |
|                 | <b>YKR</b>  | <b>YKR</b>                                                                          | <b>YKR</b>  |
| <u>MF SOTKS</u> | 1721        | PVVGHINADPTGKFCIFLEDPEEDILFHPDEKSYASIKRVITQCKGLLWISRGGSMHGTLPSTSLKTGLLRTLRLLEYAE    | 1800        |
| <u>C2 SOTKS</u> | 1719        | PVVGHLDSIDATGKFCIFIEDPETDILSSPDEKSYASIQKLVTRCKGLLWISRGGAMHGTTRPNSSLKTGLLRTLRLLEYTFE | 1798        |
| <u>MFAS</u>     | 1433        | PV-----WLTAMDC-----PTSGV-VGLVNCRLRKEPGG                                             | 1459        |
| <u>PFAS</u>     | 1440        | PV-----WLMVAVGC-----STSGV-VGMVNCRLRKEPGG                                            | 1466        |
| <u>TENS</u>     | 1737        | GVPAHSNVI-----CL-QELDRGLFTTAMTSKCLDAKLTLEINTRNLLWVTNAQHSSTPRASMFITRVLDEGEIPH        | 1809        |
|                 | <b>YKR</b>  | <b>YKR</b>                                                                          | <b>YKR</b>  |
| <u>MF SOTKS</u> | 1801        | KRF----ISLDLNP-----RAPWAHESISTIREVLRGALQTAETIPIRDSEFAENDGQLYVPRISSDIARN             | 1863        |
| <u>C2 SOTKS</u> | 1799        | KRF----ISLDLNS-----RPQWNHDSITINEVLCGALAQNDSSIKDSEFAEQDQGLFVPRISCDIARN               | 1861        |
| <u>MFAS</u>     | 1460        | HRIRCILLSNLSNTS-----HAPKLDPGSPQLQVVKHDLVMN-----VYRD                                 | 1501        |
| <u>PFAS</u>     | 1467        | HRIRCVLVSNLSNTS-----PAPEMHPSSELEQVVKHDLVMN-----VYRD                                 | 1508        |
| <u>TENS</u>     | 1810        | IRTQVLGIEPRATSSATARNLEAFRLRSDDRHAANVEDDAGDSSQVVLWHEPEAEELLSN-GTMMIPRVKARKSLSN       | 1888        |

|                 |      |                                                                                         |                                               |                         |      |
|-----------------|------|-----------------------------------------------------------------------------------------|-----------------------------------------------|-------------------------|------|
|                 |      | ER                                                                                      |                                               |                         | ER   |
| <u>MF SQTks</u> | 1864 | EALSSNSHSP-----AQTEPFHQPGKLLQMGIKTGLIDTLQFSKTDAPDHLPADYIEIEPKAF--GLNFRDVMVMAM           |                                               |                         | 1933 |
| <u>C2 SQTks</u> | 1862 | EDLSSDSNSP-----AQMEPFHQPGKLLQMGIKTGLIDTLQFSKTDADNLPNDYIEIEPKAF--GLNFRDVMVMAM            |                                               |                         | 1931 |
| <u>MFAS</u>     | 1502 | GAWGAFRHFPQ-----LEQDKPKEQTAHAFVNVLTTRGLDASIRWVSSPLKHTQPSSSGAQLCTVYYASLNFRDMLAT          |                                               |                         | 1573 |
| <u>PFAS</u>     | 1509 | GAWGAFRHFP-----LEQDRPEKQTEHAFVNVLSRGLDSSIRWVCSPLHYALPASQDRCLCSPPYYTSLNFRDVMLAT          |                                               |                         | 1580 |
| <u>TENS</u>     | 1889 | DTYLASTRAISTTVDARCVSVQAVAGPAKMLLRPVEDFAVEHAISSQSTDSKVHIQVESTLHIPEAL-----                |                                               |                         | 1955 |
|                 |      | ER                                                                                      |                                               |                         | ER   |
| <u>MF SQTks</u> | 1934 | GQLEESIMG FFCAGIVRRV GPSSAGHNIK VGDRVCA LLG QWNTNT-VRVH WHAVAPIQA MGWETAASIP IVFVTAYISL |                                               |                         | 2012 |
| <u>C2 SQTks</u> | 1932 | GQLEESIMG FFCAGIVRRV GPSSAGHNIK VGDRVCA LLG QWNTNT-VRVH WHSVAPIQA MDWETAASIP IVFVTAYISL |                                               |                         | 2010 |
| <u>MFAS</u>     | 1574 | GKLSFDAIP GKWASRDCML GMEFSGRD-R CGRRVMGLVP AEGLATSVLLS SDFLWDVPSS WTLEEAASVP VVYTTAYYSL |                                               |                         | 1652 |
| <u>PFAS</u>     | 1581 | GKLSPDSIP GKWLTRDCML GMEFSGRD-A SGRRVGMVLP AEGLATSVLLL QHATWEVPST WTLEEAASVP IVYTTAYYSL |                                               |                         | 1659 |
| <u>TENS</u>     | 1956 | ----- --DGTCLYLV CGWTRT----- --AETSVPVI ALSTSNASIV AVESKA-VAM                           |                                               |                         | 1996 |
|                 |      | ER                                                                                      |                                               |                         | ER   |
| <u>MF SQTks</u> | 2013 | VKIAKLQAKETVLIHAASGGVQAAI IILAKYAGAEIFATVGTTEEKRELLIKEY-KIPDDHIFSSRNALFAKSIQRQTNGK      |                                               |                         | 2091 |
| <u>C2 SQTks</u> | 2011 | VKIARMQAGETVLIHAASGGVQAAI IILAKHVGAEIFATVGTDEKRDLLIKEY-KIPDDHIFSSRNALFAKSIQRQTNGK       |                                               |                         | 2089 |
| <u>MFAS</u>     | 1653 | VVRGRIQRGETVLIHSGSGGVQAAI SIALSLGCRVFTTVGSAEKRAYLQARFPQLDDTSFANSRDTSFEQHVLLHTGGK        |                                               |                         | 1732 |
| <u>PFAS</u>     | 1660 | VVRGRMQPGESVLIHSGSGGVQAAI IATLSRGCVRFTTVGSAEKRAYLQARFPQLDETCFANSRDTSFEQHVLRHTAGK        |                                               |                         | 1739 |
| <u>TENS</u>     | 1997 | IDEADVKPELFRVQHMAMQALDSAVGRHQGGQSTALYGADEELAKLTSERFAVRESKVYFASRTTSAPGDWLKVQPL           |                                               |                         | 2076 |
|                 |      | ER                                                                                      |                                               |                         | ER   |
| <u>MF SQTks</u> | 2092 | GVDVVLNCLAGLLQESFDCLADFRFIEIGKRDIELNHNMGMFARSATFTAVD LIIAIGRDRSYMVAEALPKVMALLQ          |                                               |                         | 2171 |
| <u>C2 SQTks</u> | 2090 | GVDVVLNCLAGLLQESFDCLADFRFIEIGKRDIELNHNMGMFARSATFTAVD LIIAIGRDRSYMVAEALPKIMTLLQ          |                                               |                         | 2169 |
| <u>MFAS</u>     | 1733 | GVDLVNLSLAEKQLQASVRCQAQHRFLEIGKFDLSNNHPLGMAIFLKNVTFHGILLDALFEEANDSWREVAALLKAGIR         |                                               |                         | 1812 |
| <u>PFAS</u>     | 1740 | GVDLVNLSLAEKQLQASVRCQAQHRFLEIGKFDLSNNHALGMAVFLKNVTFHGILLDSLFEEGGATWQEVSELLKAGIQ         |                                               |                         | 1819 |
| <u>TENS</u>     | 2077 | LSKFALSQMPADVEVFDCLGDTESFADACTLE-----SCLSTSTVHRLDACLLSRMSQSPDTLADAYSHAKT                |                                               |                         | 2147 |
|                 |      | ER                                                                                      | ER                                            | KR                      | KR   |
| <u>MF SQTks</u> | 2172 | KQAVRPVPTISYIKIGDIETAFRLMQAGKHMGIKVIITAPEDAMVPPVTPPPKQLR-----SDAS                       |                                               | YLIIVGGLGGIQR           | 2243 |
| <u>C2 SQTks</u> | 2170 | EKAIRPVTPTISYIKIGDIETAFRLMQAGKHMGIKVIITAPEDAMVPI TRPPKQLR-----PDAS                      |                                               | YLIIVGGLGGIQR           | 2241 |
| <u>MFAS</u>     | 1813 | DGVVVKPLK-CTVFPKAQVEDAFRYMAQKHKIGKVLQVREEEPEAVLPGAQPTLISAIKTFCPAHKS                     |                                               | YLIITGGLGGFQL           | 1891 |
| <u>PFAS</u>     | 1820 | EGVVQPLK-CTVFPRTKVEAAFRYMAQKHKIGKVIQVREEEQGPAPRGLPPIALTGLSKTFCPPHKS                     |                                               | YLIITGGLGGFQL           | 1898 |
| <u>TENS</u>     | 2148 | QSNAEFSWNGNVQTFTAELAGKLSHSLMHS--VYMTDWQEKDSLIVTVPPPLQTRGLFK---SDRT                      |                                               | YLMVGAAGGLGT            | 2220 |
|                 |      | KR                                                                                      |                                               |                         | KR   |
| <u>MF SQTks</u> | 2244 | SLCKNFVENGARSLVLLSRNANVSQSGEFLEDELSTGCVVSVVDCDISNKTQVESTMLRLKEEKLPIRGIVHAGMVLQD         |                                               |                         | 2323 |
| <u>C2 SQTks</u> | 2242 | SLCKNFVENGARSLVLLSRNANVSQSGEFLEDELSTGCVVSVVDCDISNKTQVEATMLRLKDDMLPIRGIVHAGMVLQD         |                                               |                         | 2321 |
| <u>MFAS</u>     | 1892 | ELARWLVRGAQRLVLTSRSGIRTGYQAKHIREWRROGIQVLVSTSNVSSLEGARALIAEATK-LGPVGGVFNLAMVLRD         |                                               |                         | 1970 |
| <u>PFAS</u>     | 1899 | QLAQWLRGAQKLVLTSRSGIRTGYQARQVREWRROGVQVLVSTSNASSLDGARSLITEATQ-LGPVGGVFNLAMVLRD          |                                               |                         | 1977 |
| <u>TENS</u>     | 2221 | SICRMVMVNGARHVVTSRN---PKADPEMLNEARRYGAAVVVPMDACSKDCVQTVVDDMIRDTPPIAGVCNAAMVLRD          |                                               |                         | 2297 |
|                 |      | KR                                                                                      |                                               |                         | KR   |
| <u>MF SQTks</u> | 2324 | SVFHEMTLEDYNTATRPKVRGSWNLHLSALSDC--DLDFIIMLSSLAGVSGSASQANYTAGGAYQDALATYRRSRGLAAVS       |                                               |                         | 2401 |
| <u>C2 SQTks</u> | 2322 | SVFERMSLDDYNTAIRPKVQGSWNLHSLSDC--DLDFIIMLSSLAGVSGSASQANYTAGGAYQDALAKYRRAQGLSAVS         |                                               |                         | 2399 |
| <u>MFAS</u>     | 1971 | AMLENQTPPELFDQVVKPKYNGTLNDRATREACPELDYFVAFSSVSCGRGNAGQTNYGANSTMERICEQRRHDLGPLA          |                                               |                         | 2050 |
| <u>PFAS</u>     | 1978 | AVLENQTPPEFFQDVSKPKYSGTANLDRVTRACPELDYFVIFSSVSCGRGNAGQANYGFANSAMERICCKRRHDLGPLA         |                                               |                         | 2057 |
| <u>TENS</u>     | 2298 | KLFLDMNVHDHNNVLGPKMQGTEHLDSIFAQE--PLDFVLLSSSAAI LNNTGQSNYHCANLYMSLVNRRSRGLAAST          |                                               |                         | 2375 |
|                 |      | KR                                                                                      |                                               |                         | KR   |
| <u>MF SQTks</u> | 2402 | IDLGMVQSVGYVAETKGAERLVRMGYSPISEMEVLKIVEHAIT-----NPPPETSSGQIITGIS--TKPGRHWTESSWL         |                                               |                         | 2474 |
| <u>C2 SQTks</u> | 2400 | IDLGMVQSVGYVAETKGAERLVRMGYSPISEMEVLKIVEHAIT-----NPPPEASSAQIITGIS--TKPGRHWTESSWL         |                                               |                         | 2472 |
| <u>MFAS</u>     | 2051 | VQWGAIGDVGIVLEAMGTNDTVIG-GTLPQRISSCMEVLDLFLN-----QPHAVLSSFLAEKKA--VAHGDDTQRDV           |                                               |                         | 2122 |
| <u>PFAS</u>     | 2058 | VQWGAIGDVGIVLEAMGTNDTVIG-GTLPQRIASCLEVLDLFLS-----QPHAVLSSFLAEKKA--AAPRGDSSQKDLV         |                                               |                         | 2129 |
| <u>TENS</u>     | 2376 | IHVGHVCDTGVVARLVDDSKVQMSLGTTRVMSVSETDVHHAFAEAVRGGQPDSTRSGSHNIIMGIEPPTKPLDVAKKPPVW       |                                               |                         | 2455 |
|                 |      | ACP                                                                                     |                                               |                         | ACP  |
| <u>MF SQTks</u> | 2475 | ----QDARFATLRERARDVKEQSNAGGGQDKQIAGQELSMATSLVEAIDVVGRAITAKLATMFLIAAESTIASKSLSE          |                                               |                         | 2475 |
| <u>C2 SQTks</u> | 2473 | ----QDARFATLRERARDVKELSNQGGAQDKQLAAGQELSMATSLVEAIDVVGRAITAKLATMFLIAAESTIASKSLSE         |                                               |                         | 2473 |
| <u>MFAS</u>     | 2123 |                                                                                         |                                               | KAVAHILGIRDLAGINLSDTLAD |      |
| <u>PFAS</u>     | 2130 |                                                                                         |                                               | KAVAHILGIRDVASINPDSTLV  |      |
| <u>TENS</u>     | 2456 | ISDPRLGHMLPFSTLENQMVASEQAAASAADSLAQVSEATTDEEAAAALKGFATKLEGILLPLGSGEDSAGRPTV             |                                               |                         |      |
|                 |      | ACP                                                                                     |                                               |                         | ACP  |
| <u>MF SQTks</u> |      | YGVDSLVAVELR                                                                            | NWLAAQLSSDVSVDVTSQSLTALATTVATKSSRIDKSLVA      |                         | 2605 |
| <u>C2 SQTks</u> |      | YGVDSLVAVELR                                                                            | NWLAAQLSSDVSVDVTSQSLTALATTVATKSSRIDKSLVA      |                         | 2603 |
| <u>MFAS</u>     |      | LGLDSLGMVEVVR                                                                           | QILEREHDLVLPMEVRQLTLRKLQEMSSKTDSDATDTAPKSRSD  |                         | 2202 |
| <u>PFAS</u>     |      | LGLDSLGMVEVVR                                                                           | QILEREHDLVLSMREVRQLSLRKLQELSSKTDSDADPATPTSHED |                         | 2209 |
| <u>TENS</u>     |      | LGIDSLVAELR                                                                             | TWFLKQLRVDVPMKLLGGSTVGQ                       |                         | 2571 |

MF SQTks - from Phoma MF5453  
C2 SQTks - from Phoma C2932  
MFAS - vertebrate FAS from Mouse  
PFAS - vertebrate FAS from Pig  
TENS - Tenellin synthetase PKS from *Beauveria bassiana*

XX - conserved cofactor binding residues, active site catalytic residues  
XX - Residues identified here as substrate-binding.



## 1.2 Sequence alignment of SQTKS ER domain with CurF ER domain (pdb 5dp2)

```

1. SQTKS-ER 1 LPNDYIELEEPKAEGLNERDNMVAMQLESEL-----MCFE-CVVRRVCPSSAG
2. Template 1 EVQIKAVPNEREVLNVLCIFOEVIKKRYRSGIISAENLTFEVEGVCTVAVC--SDV
1. SQTKS-ER 70 HNIKVGDRV-CALLEGQWTNTVRVHWHSVAPIQAMDWETAVASEPIVVPAVISVKIARMOAC
2. Template 70 SQWKVGDEVILAYPENAESSFVICSPDDLLAKESDLSMVEAVATEFMSEFFVAVIGHNLAKVOPC
1. SQTKS-ER 130 EVLIHAASGGAGOAAILAKHVGAEIFAVVGDEKRDLLIKEYKIPDDHIFSRNALFAKSIR
2. Template 130 ERVLIHAASGGAGOAAILAKHVGAEIFAVVGDEKRDLLIKEYKIPDDHIFSRNALFAKSIR
1. SQTKS-ER 200 QRLNEKEVDVLNCHAGE-LLQESFDCHADEGRFEELGKRDIELNHCLNMGMF-ARSATETAVD
2. Template 200 ELLQENEVDVLNCHEYTHEYTPKNIDIFAPGERVELGRLNEHEQVSQRREDVKYEFEDMSD
1. SQTKS-ER 260 LIAIGRDRSYMFAEALPKIMTLQEKAIRPVTPISIYKIGDIETAPRLMOACKHMCKLVIHAE
2. Template 260 EFV--RDKQEH-AKLWDDLALEFESGSLKEL-EYKVEPSEDVVEAPRHLOHSKHIEKLVVME

```

## 1.3 Sequence alignment of the SQTKS ER domain with other fungal ER domains.

```

SSS S S S S
Fumonisin (1809) NFRDVLLAMGIVEANNLGIELEGSVITDVGAGV----TDLQVGDRVF
Zearalenone (1688) NFRDVMASMALVPVK--GLQQEASGIVLRTGRDA----THLKPGDRVS
Alternapyrone (1185) NEKDVLVALGNLAEN-K-LEVDASGIVTRVGSAV----TNVQVGDRVM
Squalestatin (1923) NFRDVMVAMQLES--LMGEC-GVVRRVGPSS--AGHNIKVGDRVC
Asperfuranone (1853) NFRDVMVAMQLKER-V-MGLECAGVITRVGAEA-A-AQGFAVGDRVM

CSC CC
Fumonisin (1853) YLDDNCFSTRITMSAMRCARIPSFLSYEEAATMPCVYATVIHSLVDIG
Zearalenone (1706) TLDMGTHATVMRADHRVTVKIPDAMSFEEAAVPVHTTAYALVRLA
Alternapyrone (1927) TASCDTFATYVRFPAKGAIGVPTGMSFEEAASMLIFLTAYALVTAG
Squalestatin (1966) ALLGQWTNTVRVHWHSVAPIQAMDWETAASIPIVFVTAISLVKIA
Asperfuranone (1897) ALLLGFFSRARVSWHGVASMPAGMGFADAASIPMIFTTAYVALVQAA

CCCCCCCC C C
Fumonisin (1901) GLQSQSVLIHSACGGIGIAAINVCQSIGEVQVYVVTVGNQDKVRYLME
Zearalenone (1758) KLQRQSVLIHAAAGVGQAALQLAN-HLGLVVYATVGSDDKRLLTD
Alternapyrone (1975) GIVAGEKVLIHAAAGVGQAAIMIAQ-AKGAEIFATVGADTKQLLIE
Squalestatin (2015) RMQAETVLIHAASGVGQAAILAK-HVGAEIFATVGTDEKRDLLIK
Asperfuranone (1945) RLSQQTVLIHAAAGVGQAAVILAKEYLAEVFATVGSQEKRDLLIK

CC C S
Fumonisin (1954) TFNIPRASIFNSRDTSFREDVLAHINGRGVDLVLNSLSGELLHASW-E
Zearalenone (1810) TYQVSEDHIFNSRDASFAKGIMRVTGGRGVDCVLNSLSGELLRVSW-S
Alternapyrone (2027) QYGIPEDHIFSSRDTSFVKGVLRADGQGVDLVLNSLAGEALRLSWD
Squalestatin (2067) EYKIPDDHIFSSRNALFAKSIRQRTNGKGVDVLNCLAGLLQESF-D
Asperfuranone (1998) EYGIPDDHIFNSRDSSFAPAALAAAGRGVDCLI-----E

CCSSS CSSS
Fumonisin (2006) CVAPYGKMLEIGKRDFIGKAKLSDIFEANRSFIGIDL--ARFDAAR
Zearalenone (1862) CLATFGTFVEIGLRITNNMLLDRFFSKSTTFSFINYTLFEEDPSA
Alternapyrone (2080) CLAKFGRFLEIGKADLFANTGLDMKPLLDNKSYIGVNLLDFENNPTPR
Squalestatin (2119) CLADFGRFIEIGKRDIELNHCLNMGMFARSATFTAVDLLAIGRDRSYM
Asperfuranone (2038) VLAPFGHFVEIGKRDLEQNSLEATFTRAVSFTSLDMTLLRQRGDE

S
Fumonisin (2056) CHPLLTRTVQMLEAGHIKPIAPRTTFSAGHIEDSFR
Zearalenone (1915) LGDILEEVFKLLGGILQTPSPMTVYPINQVEDAFR
Alternapyrone (2133) AVALWHDTAKMIHDGAIKPIAPLQVFTMAEVEKAFR
Squalestatin (2157) FAEALPKIMTLLQEKAIRPVTPISIYKIGDIETAFR
Asperfuranone (2091) AHRVLSELARLAGQGIVKPVHPVSVYPMRQVDKAFR

```

█ Identical within hr-PKS ER domains    █ Highly conserved within hr-PKS ER domains  
█ Mutagenesis residue                    C = Cofactor binding; S = Substrate binding

## 2.0 Model Building and Docking

### 2.1 Model Building

SQTKS ER domain boundaries were previously determined as G1888-A2208.<sup>1</sup> This protein sequence was submitted to SwissModel and the template 5dp2 (CurF ER)<sup>2</sup> was selected for model construction using standard parameters.

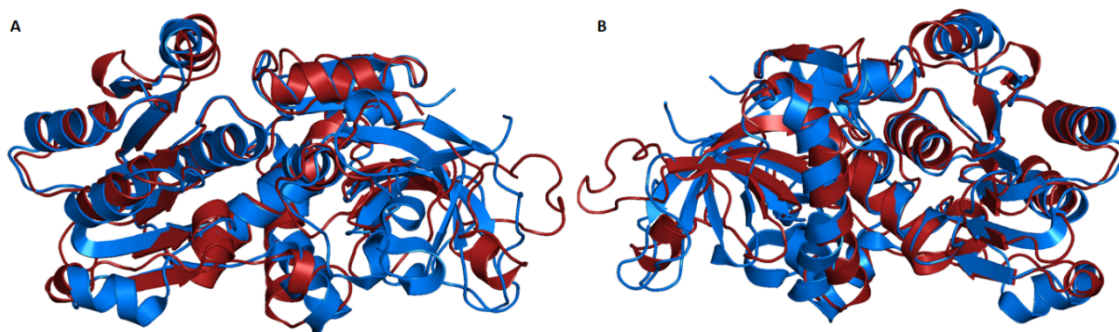

**Figure S2.1A:** Alignment of the SQTKS ER model (red) with the template CurF (PDB: 5dp2; blue) displayed in PyMOL. **A**, Front view; **B**, Back view.

### 2.2 Integration of the Cofactor

NADPH was integrated into the ER domain through the alignment of the model structure with the template in PyMOL (DeLano Scientific LLC, Version 1.8.2.0).<sup>3,4</sup> The cofactor coordinates were extracted from the template and then manually integrated into the structural model of the ER domain in PyMOL. The generated domain plus cofactor was then minimized in YASARA, to refine the protein-cofactor interaction.<sup>5</sup>

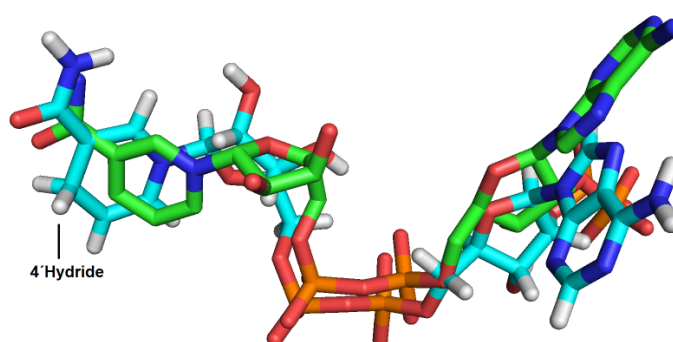

**Figure S2.2A:** Alignment of the cofactor **NADPH** from the SQTKS ER model (green) with the cofactor from the CurF (blue)

### 2.3 Investigation of the pocket volume

Pocket volumes were determined using the 3V web server.<sup>6</sup> As search parameters an outer probe radius of 10 Å and an inner probe radius of 2 Å were used.

## 2.4 Molecular Docking

Docking was performed by manually placing the specific substrate in the active site of the *holo*-ER model using PyMOL. This method minimized the Grid Box, which has critical role in the speed of the docking calculations. Molecular docking was then done using using Autodock Vina (PyRx 0.8).<sup>4,7,8</sup> Python 3.6 was used as the underlying programming language for performing the calculations with AutoDock Vina. All calculations were performed using. The protocol included the creation of pdbqt files of the respective substrate and protein. The degrees of freedom for the substrate were set as a default to maximum. The coordinates of the Grid Box were customized for the specific protein-substrate complex. However, the size of the Grid Box that was used by default was  $20 \times 20 \times 20$  points. Afterwards, this information was saved in the corresponding configuration file. For the subsequent calculations the AutoDock Vina file was used. Docking results, including the lowest binding energy and mean binding energy, were obtained from the docking log (dlg) file. The docked substrates were then compared using PyMOL. The best docked substrates were chosen and separate saved in a new pdb file then refined by YASARA. The visualization of the different models, after the refinement step was always done in PyMOL.

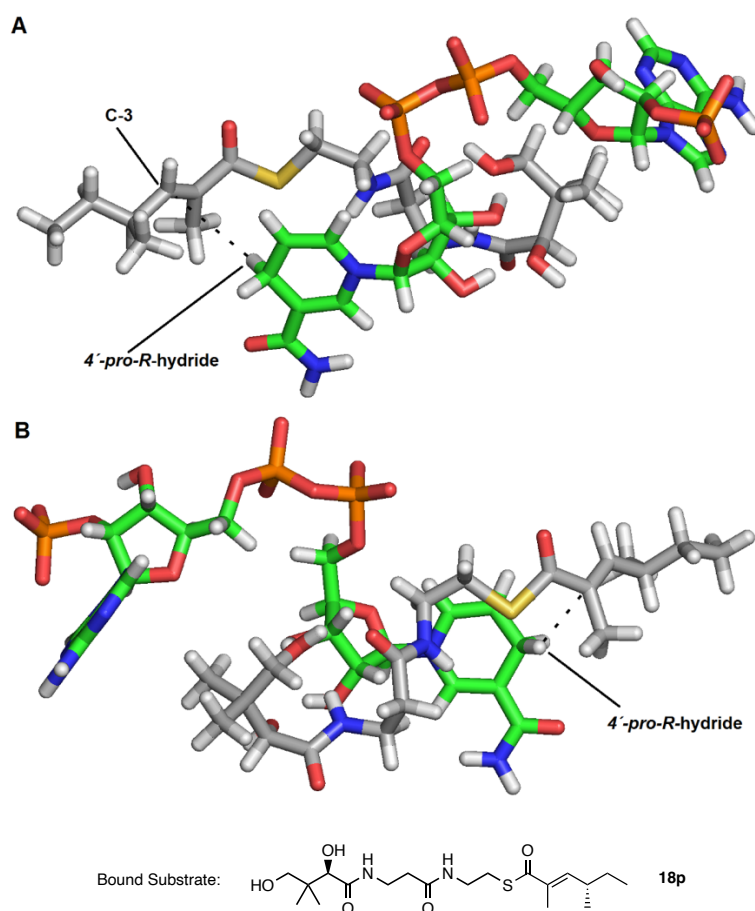

**Figure S2.4A:** Active site of the ER domain. Cofactor NADPH (green) and the modeled substrate squalestatin triketide 4S-2E-dimethylhex-2-enoylpantetheine **18p** (white). The hydride at the cofactor are marked. **A**, Back view; **B**, Front view.

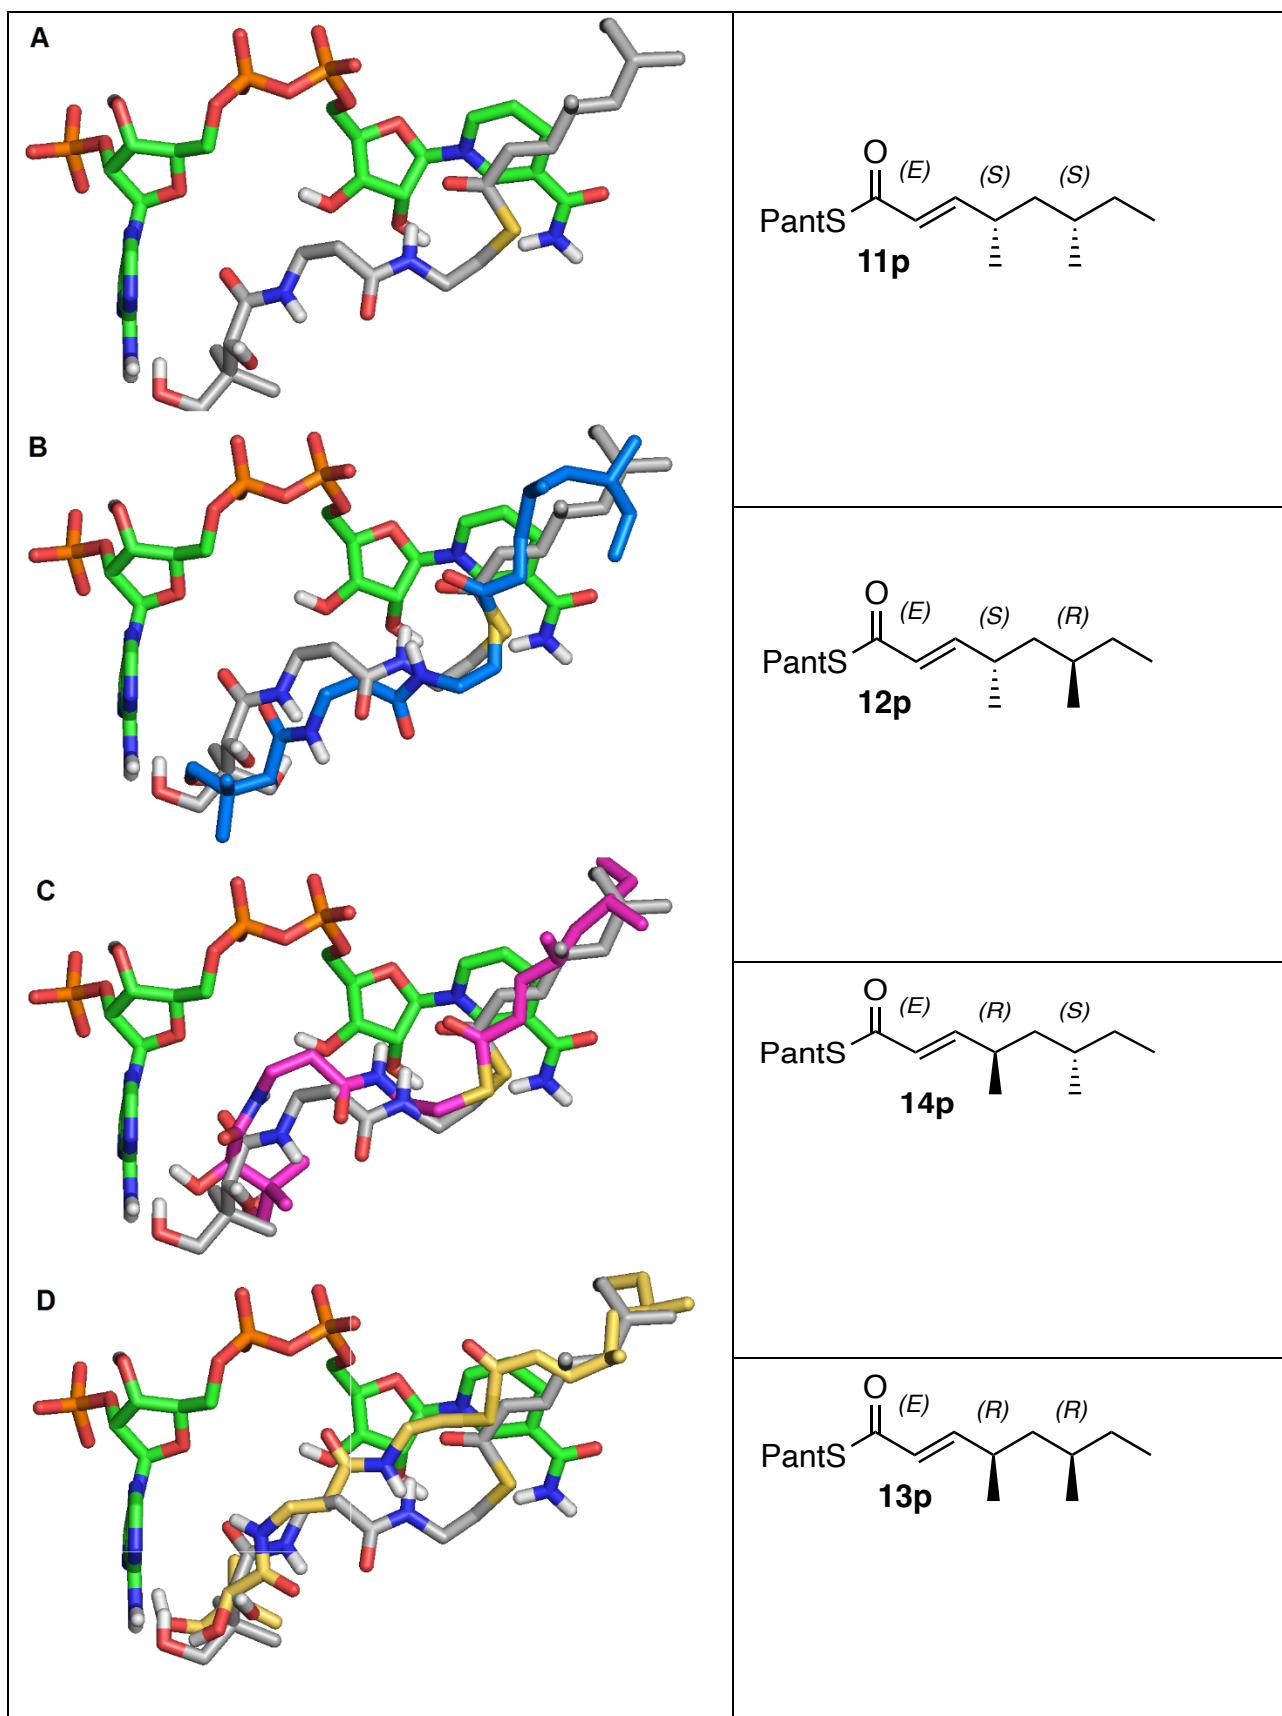

**Figure S2.4B:** Display of the active site of the ER domain with the cofactor in (green). In addition to the squalstatin tetraketide **11p** (4*S*,6*S*) are displayed the other docked diastereomers (grey). Blue (4*S*, 6*R*) **12p**, pink (4*R*, 6*S*) **14p** and in yellow (4*R*, 6*R*) **13p**.

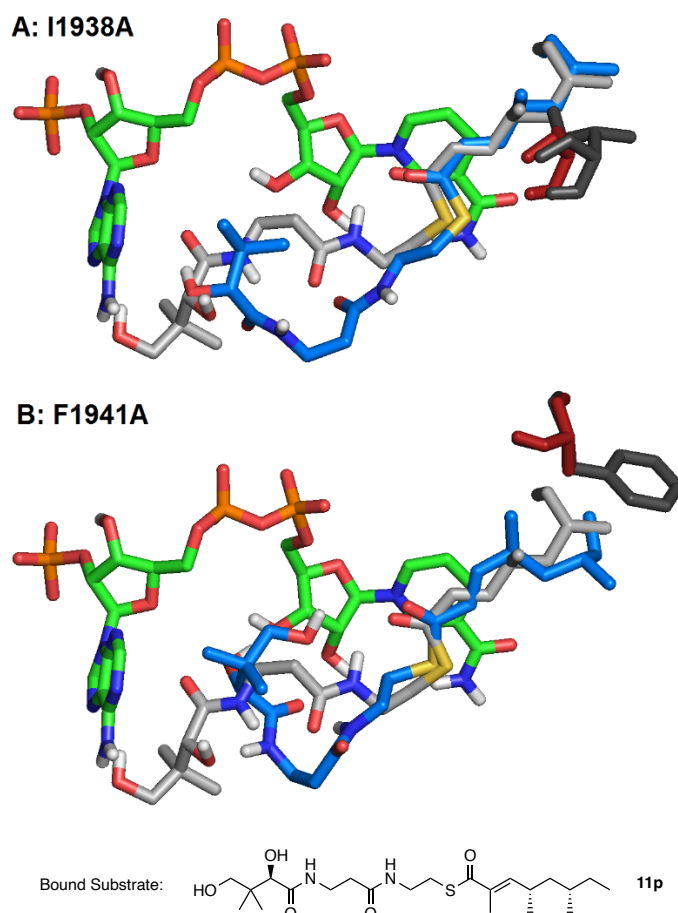

**Figure S2.4C:** Active site of the ER domain. In green the cofactor NADPH. Displayed are the docked tetraketide **11p** of the wild type (white) compared to the docked tetraketide **11p** in the mutant active site (blue).

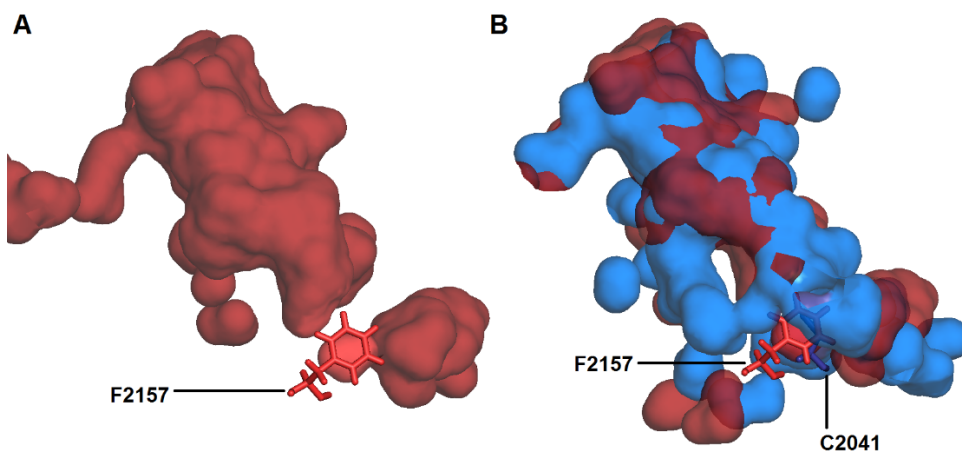

**Figure S2.4D:** Overlay of ER homology models: **A**, in red the pocket volume of SQTGS ER with the residue F2157 at the end of the pocket; **B**, in red the pocket volume of WT SQTGS ER (tetraketide), in blue pocket volume of FUM1 ER (nonaketide). In addition the residues F2157 of the SQTGS and C2041 of FUM1 at the end of the pocket are displayed. Interior surfaces of the proposed substrate binding pockets are shown.



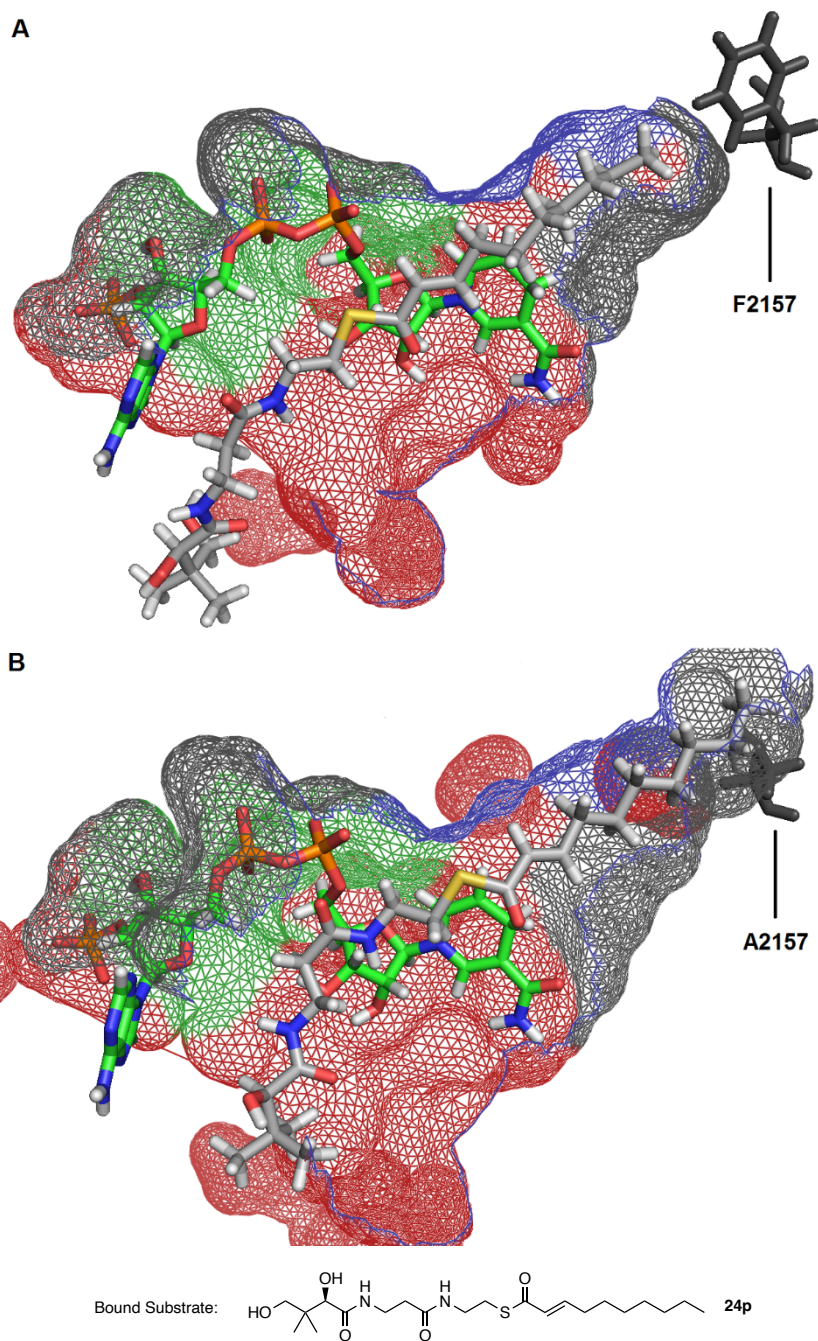

**Figure S2.4E:** Active site of the SQTGS ER domain with a mesh surface. In green the cofactor NADPH and in white the modeled pentaketide substrate **24p**. Modelled are: **A**, WT ER; **B**, F2157A ER.



## 2.5 Distance between the $\alpha$ -carbon and the catalytic hydrogen of the nicotinamide

|    | Model SQTKS <i>holo</i> ER | Ligand                                        | A-Carbon distance / Å |
|----|----------------------------|-----------------------------------------------|-----------------------|
| 1  | WT                         | -                                             | -                     |
| 2  | WT                         | Triketide <b>18p</b>                          | 2.8                   |
| 3  | WT                         | 4 <i>S</i> ,6 <i>S</i> tetraketide <b>11p</b> | 3.7                   |
| 4  | WT                         | 4 <i>R</i> ,6 <i>S</i> tetraketide <b>12p</b> | 3.5                   |
| 5  | WT                         | 4 <i>R</i> ,6 <i>R</i> tetraketide <b>13p</b> | 3.6                   |
| 6  | WT                         | 4 <i>S</i> ,6 <i>R</i> tetraketide <b>14p</b> | 3.5                   |
| 7  | WT                         | Pentaketide <b>24p</b>                        | 4.9                   |
| 8  | I1938A                     | 4 <i>S</i> ,6 <i>S</i> tetraketide <b>11p</b> | 3.6                   |
| 9  | F1941A                     | 4 <i>S</i> ,6 <i>S</i> tetraketide <b>11p</b> | 3.1                   |
| 10 | L2146A                     | Triketide <b>18p</b>                          | 3.0                   |
| 11 | L2146A                     | Pentaketide <b>24p</b>                        | 4.5                   |
| 12 | L2146V                     | Triketide <b>18p</b>                          | 2.8                   |
| 13 | L2146V                     | Pentaketide <b>24p</b>                        | 4.8                   |
| 14 | I2147A                     | Triketide <b>18p</b>                          | 3.1                   |
| 15 | I2147A                     | Pentaketide <b>24p</b>                        | 4.9                   |
| 16 | F2157A                     | Triketide <b>18p</b>                          | 2.2                   |
| 17 | F2157A                     | Pentaketide <b>24p</b>                        | 3.2                   |
| 18 | L2146A/I2147A              | Triketide <b>18p</b>                          | 2.9                   |
| 19 | L2146A/I2147A              | Pentaketide <b>24p</b>                        | 4.8                   |
| 20 | I2147A/F2157V              | Triketide <b>18p</b>                          | 2.0                   |
| 21 | I2147A/F2157V              | Pentaketide <b>24p</b>                        | 4.4                   |
| 22 | F1941A/F2157A              | Triketide <b>18p</b>                          | 2.3                   |
| 23 | F1941A/F2157A              | Pentaketide <b>24p</b>                        | 3.7                   |
| 24 | F1941A/I2147A/F2157V       | Triketide <b>18p</b>                          | 2.0                   |
| 25 | F1941A/I2147A/F2157V       | Pentaketide <b>24p</b>                        | 4.7                   |
| 26 | F1941A/I2147A/F2157V       | Tetraketide <b>11p</b>                        | 2.7                   |

## 2.6 Data Deposition

All model structures have been deposited at *figshare* as pdb coordinate files with the following DOI:

|    | <b>Model</b> SQTKS <i>holo</i> ER | <b>Ligand</b>                                 | <b>DOI</b>                                                                              |
|----|-----------------------------------|-----------------------------------------------|-----------------------------------------------------------------------------------------|
| 1  | WT                                | -                                             | <a href="https://doi.org/10.6084/m9.figshare.11709966">10.6084/m9.figshare.11709966</a> |
| 2  | WT                                | Triketide <b>18p</b>                          | <a href="https://doi.org/10.6084/m9.figshare.11709567">10.6084/m9.figshare.11709567</a> |
| 3  | WT                                | 4 <i>S</i> ,6 <i>S</i> tetraketide <b>11p</b> | <a href="https://doi.org/10.6084/m9.figshare.11709579">10.6084/m9.figshare.11709579</a> |
| 4  | WT                                | 4 <i>R</i> ,6 <i>S</i> tetraketide <b>12p</b> | <a href="https://doi.org/10.6084/m9.figshare.11709585">10.6084/m9.figshare.11709585</a> |
| 5  | WT                                | 4 <i>R</i> ,6 <i>R</i> tetraketide <b>13p</b> | <a href="https://doi.org/10.6084/m9.figshare.11709591">10.6084/m9.figshare.11709591</a> |
| 6  | WT                                | 4 <i>S</i> ,6 <i>R</i> tetraketide <b>14p</b> | <a href="https://doi.org/10.6084/m9.figshare.11709600">10.6084/m9.figshare.11709600</a> |
| 7  | WT                                | Pentaketide <b>24p</b>                        | <a href="https://doi.org/10.6084/m9.figshare.11709621">10.6084/m9.figshare.11709621</a> |
| 8  | I1938A                            | 4 <i>S</i> ,6 <i>S</i> tetraketide <b>11p</b> | <a href="https://doi.org/10.6084/m9.figshare.11709639">10.6084/m9.figshare.11709639</a> |
| 9  | F1941A                            | 4 <i>S</i> ,6 <i>S</i> tetraketide <b>11p</b> | <a href="https://doi.org/10.6084/m9.figshare.11709651">10.6084/m9.figshare.11709651</a> |
| 10 | L2146A                            | Triketide <b>18p</b>                          | <a href="https://doi.org/10.6084/m9.figshare.11709657">10.6084/m9.figshare.11709657</a> |
| 11 | L2146A                            | Pentaketide <b>24p</b>                        | <a href="https://doi.org/10.6084/m9.figshare.11709669">10.6084/m9.figshare.11709669</a> |
| 12 | L2146V                            | Triketide <b>18p</b>                          | <a href="https://doi.org/10.6084/m9.figshare.11709672">10.6084/m9.figshare.11709672</a> |
| 13 | L2146V                            | Pentaketide <b>24p</b>                        | <a href="https://doi.org/10.6084/m9.figshare.11709681">10.6084/m9.figshare.11709681</a> |
| 14 | I2147A                            | Triketide <b>18p</b>                          | <a href="https://doi.org/10.6084/m9.figshare.11709684">10.6084/m9.figshare.11709684</a> |
| 15 | I2147A                            | Pentaketide <b>24p</b>                        | <a href="https://doi.org/10.6084/m9.figshare.11709690">10.6084/m9.figshare.11709690</a> |
| 16 | F2157A                            | Triketide <b>18p</b>                          | <a href="https://doi.org/10.6084/m9.figshare.11709702">10.6084/m9.figshare.11709702</a> |
| 17 | F2157A                            | Pentaketide <b>24p</b>                        | <a href="https://doi.org/10.6084/m9.figshare.11709711">10.6084/m9.figshare.11709711</a> |
| 18 | L2146A/I2147A                     | Triketide <b>18p</b>                          | <a href="https://doi.org/10.6084/m9.figshare.11709729">10.6084/m9.figshare.11709729</a> |
| 19 | L2146A/I2147A                     | Pentaketide <b>24p</b>                        | <a href="https://doi.org/10.6084/m9.figshare.11709744">10.6084/m9.figshare.11709744</a> |
| 20 | I2147A/F2157V                     | Triketide <b>18p</b>                          | <a href="https://doi.org/10.6084/m9.figshare.11709747">10.6084/m9.figshare.11709747</a> |
| 21 | I2147A/F2157V                     | Pentaketide <b>24p</b>                        | <a href="https://doi.org/10.6084/m9.figshare.11709756">10.6084/m9.figshare.11709756</a> |
| 22 | F1941A/F2157A                     | Triketide <b>18p</b>                          | <a href="https://doi.org/10.6084/m9.figshare.11709768">10.6084/m9.figshare.11709768</a> |
| 23 | F1941A/F2157A                     | Pentaketide <b>24p</b>                        | <a href="https://doi.org/10.6084/m9.figshare.11709882">10.6084/m9.figshare.11709882</a> |
| 24 | F1941A/I2147A/F2157V              | Triketide <b>18p</b>                          | <a href="https://doi.org/10.6084/m9.figshare.11709897">10.6084/m9.figshare.11709897</a> |
| 25 | F1941A/I2147A/F2157V              | Pentaketide <b>24p</b>                        | <a href="https://doi.org/10.6084/m9.figshare.11709903">10.6084/m9.figshare.11709903</a> |
| 26 | F1941A/I2147A/F2157V              | Tetraketide <b>11p</b>                        | <a href="https://doi.org/10.6084/m9.figshare.11709963">10.6084/m9.figshare.11709963</a> |

## 2.7 Ramachandran Analysis

All protein models were analysed using RAMPAGE (<http://mordred.bioc.cam.ac.uk/~rapper/rampage.php>).<sup>9</sup>

### 2.7.2 WT Triketide 18p

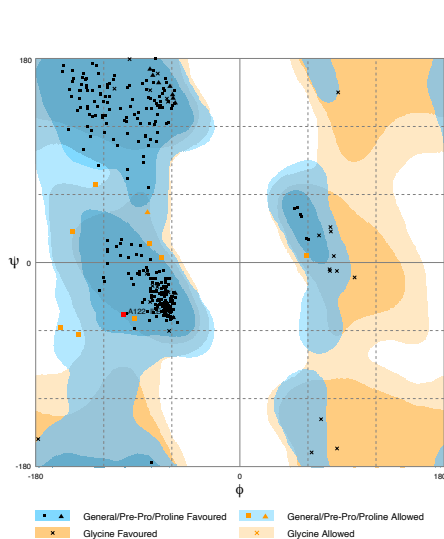

Number of residues in favoured region (-98.0% expected) : 309 (96.9%)  
 Number of residues in allowed region (-2.0% expected) : 9 (2.8%)  
 Number of residues in outlier region : 1 (0.3%)

RAMPAGE by Paul de Bakker and Simon Lovell available at <http://www-cryst.bioc.cam.ac.uk/rampage/>  
 Please cite: S.C. Lovell, I.W. Davis, W.B. Arendall Jr, P.J.W. de Bakker, J.M. Word, M.G. Peisach, J.S. Richardson & D.C. Richardson (2003)  
 Structure validation by Ca geometry and C $\beta$  deviation. *Procedures. Structure, Function & Genomics*, **38**, 407-420

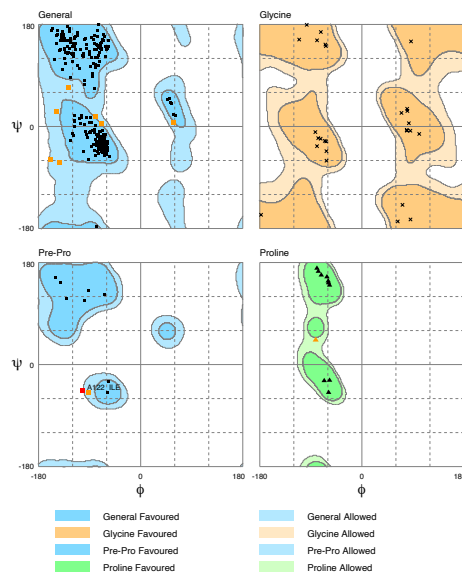

Number of residues in favoured region (-98.0% expected) : 309 (96.9%)  
 Number of residues in allowed region (-2.0% expected) : 9 (2.8%)  
 Number of residues in outlier region : 1 (0.3%)

RAMPAGE by Paul de Bakker and Simon Lovell available at <http://www-cryst.bioc.cam.ac.uk/rampage/>  
 Please cite: S.C. Lovell, I.W. Davis, W.B. Arendall Jr, P.J.W. de Bakker, J.M. Word, M.G. Peisach, J.S. Richardson & D.C. Richardson (2003)  
 Structure validation by Ca geometry and C $\beta$  deviation. *Procedures. Structure, Function & Genomics*, **38**, 407-420

### 2.7.3 WT 4S,6S tetraketide 11p

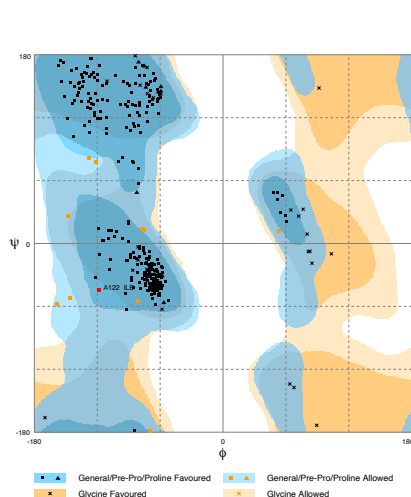

Number of residues in favoured region (-98.0% expected) : 308 (96.6%)  
 Number of residues in allowed region (-2.0% expected) : 10 (3.1%)  
 Number of residues in outlier region : 1 (0.3%)

RAMPAGE by Paul de Bakker and Simon Lovell available at <http://www-cryst.bioc.cam.ac.uk/rampage/>  
 Please cite: S.C. Lovell, I.W. Davis, W.B. Arendall Jr, P.J.W. de Bakker, J.M. Word, M.G. Peisach, J.S. Richardson & D.C. Richardson (2003)  
 Structure validation by Ca geometry and C $\beta$  deviation. *Procedures. Structure, Function & Genomics*, **38**, 407-420

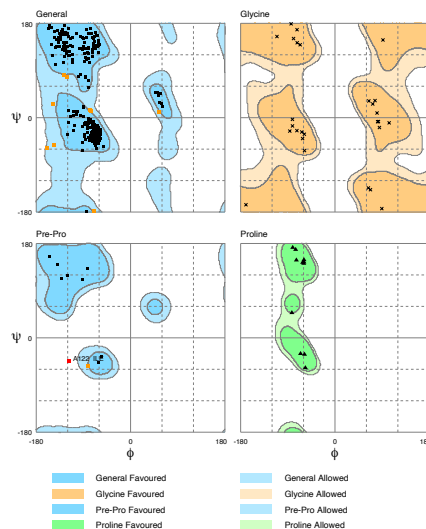

Number of residues in favoured region (-98.0% expected) : 308 (96.6%)  
 Number of residues in allowed region (-2.0% expected) : 10 (3.1%)  
 Number of residues in outlier region : 1 (0.3%)

RAMPAGE by Paul de Bakker and Simon Lovell available at <http://www-cryst.bioc.cam.ac.uk/rampage/>  
 Please cite: S.C. Lovell, I.W. Davis, W.B. Arendall Jr, P.J.W. de Bakker, J.M. Word, M.G. Peisach, J.S. Richardson & D.C. Richardson (2003)  
 Structure validation by Ca geometry and C $\beta$  deviation. *Procedures. Structure, Function & Genomics*, **38**, 407-420

## 2.7.4 WT 4R,6S tetraketide 12p

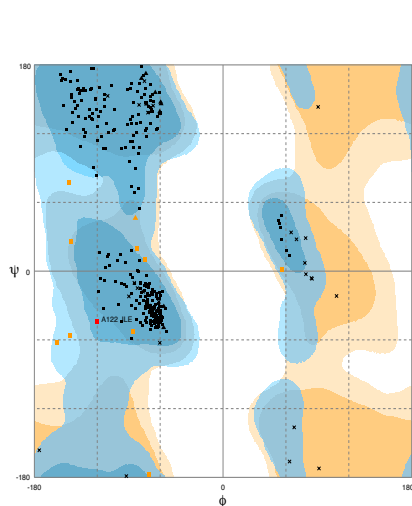

▲ ▲ General/Pre-Pro/Proline Favoured    ▲ ▲ General/Pre-Pro/Proline Allowed  
x Glycine Favoured    x Glycine Allowed

Number of residues in favoured region (~98.0% expected) : 308 (96.6%)  
 Number of residues in allowed region (~2.0% expected) : 10 (3.1%)  
 Number of residues in outlier region : 1 (0.3%)

RAMPAGE by Paul de Bakker and Simon Lovell available at <http://www.crysl.bmc.com.uk/rampage/>  
 Please cite S.C. Lovell, W. Davis, W.B. Avasthi, P.J.W. de Bakker, J.M. Wood, M.G. Pezart, C.J. Richardson & D.C. Richardson (2002)  
 Structure validation by Ca geometry and C $\beta$  deviation. *Procedures, Structures, Function & Genetics*, **50**, 437-450

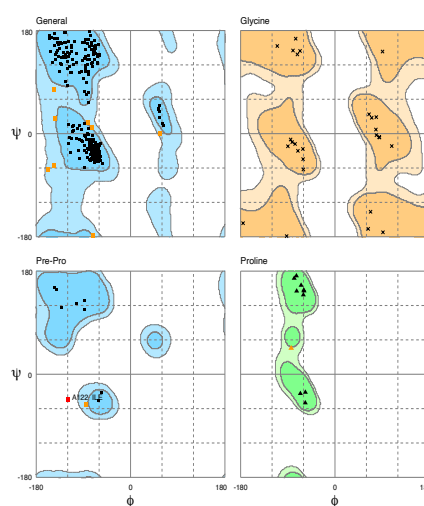

■ General Favoured    ■ General Allowed  
■ Glycine Favoured    ■ Glycine Allowed  
■ Pre-Pro Favoured    ■ Pre-Pro Allowed  
■ Proline Favoured    ■ Proline Allowed

Number of residues in favoured region (~98.0% expected) : 308 (96.6%)  
 Number of residues in allowed region (~2.0% expected) : 10 (3.1%)  
 Number of residues in outlier region : 1 (0.3%)

RAMPAGE by Paul de Bakker and Simon Lovell available at <http://www.crysl.bmc.com.uk/rampage/>  
 Please cite S.C. Lovell, W. Davis, W.B. Avasthi, P.J.W. de Bakker, J.M. Wood, M.G. Pezart, C.J. Richardson & D.C. Richardson (2002)  
 Structure validation by Ca geometry and C $\beta$  deviation. *Procedures, Structures, Function & Genetics*, **50**, 437-450

## 2.7.5 WT 4R,6R tetraketide 13p

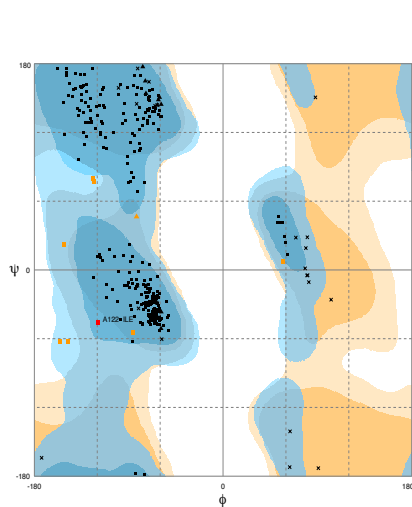

▲ ▲ General/Pre-Pro/Proline Favoured    ▲ ▲ General/Pre-Pro/Proline Allowed  
x Glycine Favoured    x Glycine Allowed

Number of residues in favoured region (~98.0% expected) : 310 (97.2%)  
 Number of residues in allowed region (~2.0% expected) : 8 (2.5%)  
 Number of residues in outlier region : 1 (0.3%)

RAMPAGE by Paul de Bakker and Simon Lovell available at <http://www.crysl.bmc.com.uk/rampage/>  
 Please cite S.C. Lovell, W. Davis, W.B. Avasthi, P.J.W. de Bakker, J.M. Wood, M.G. Pezart, C.J. Richardson & D.C. Richardson (2002)  
 Structure validation by Ca geometry and C $\beta$  deviation. *Procedures, Structures, Function & Genetics*, **50**, 437-450

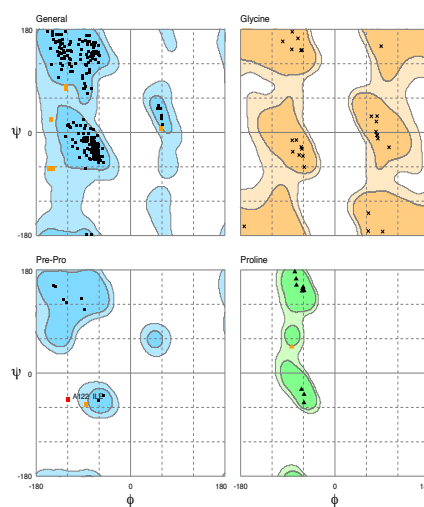

■ General Favoured    ■ General Allowed  
■ Glycine Favoured    ■ Glycine Allowed  
■ Pre-Pro Favoured    ■ Pre-Pro Allowed  
■ Proline Favoured    ■ Proline Allowed

Number of residues in favoured region (~98.0% expected) : 310 (97.2%)  
 Number of residues in allowed region (~2.0% expected) : 8 (2.5%)  
 Number of residues in outlier region : 1 (0.3%)

RAMPAGE by Paul de Bakker and Simon Lovell available at <http://www.crysl.bmc.com.uk/rampage/>  
 Please cite S.C. Lovell, W. Davis, W.B. Avasthi, P.J.W. de Bakker, J.M. Wood, M.G. Pezart, C.J. Richardson & D.C. Richardson (2002)  
 Structure validation by Ca geometry and C $\beta$  deviation. *Procedures, Structures, Function & Genetics*, **50**, 437-450

## 2.7.6

## WT 4S,6R tetraketide 14p

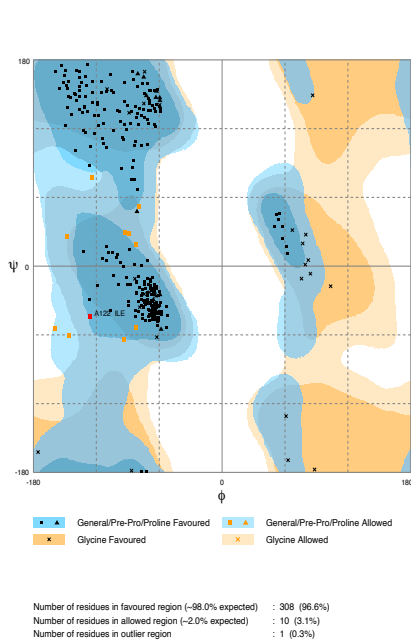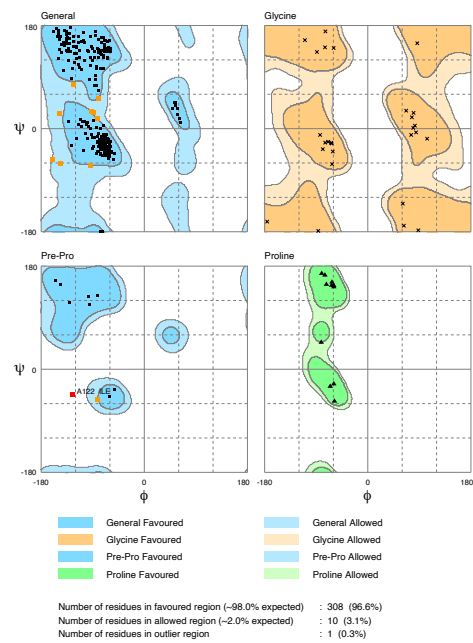

## 2.7.7

## WT Pentaketide 24p

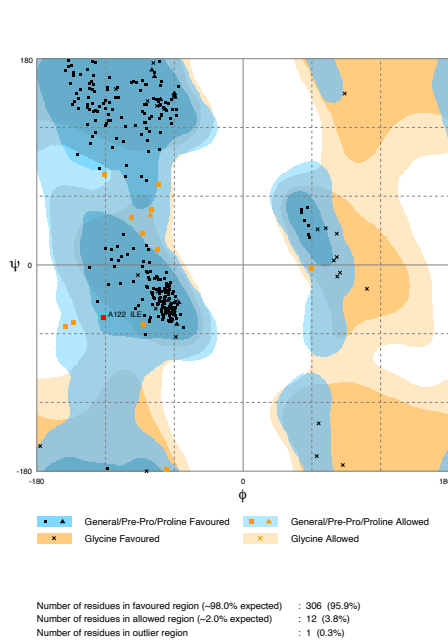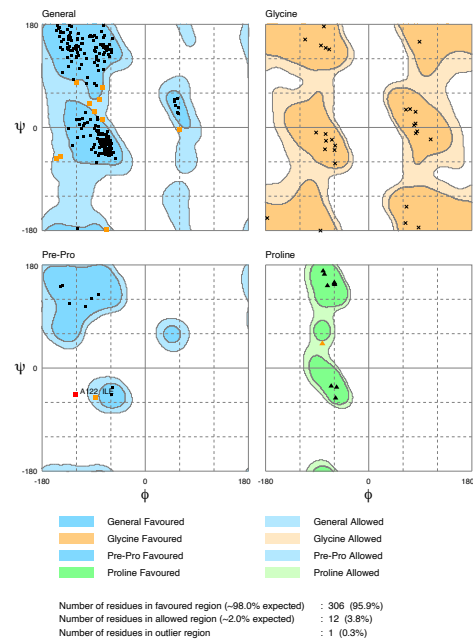

## 2.7.8 11938A 4S,6S tetraketide 11p

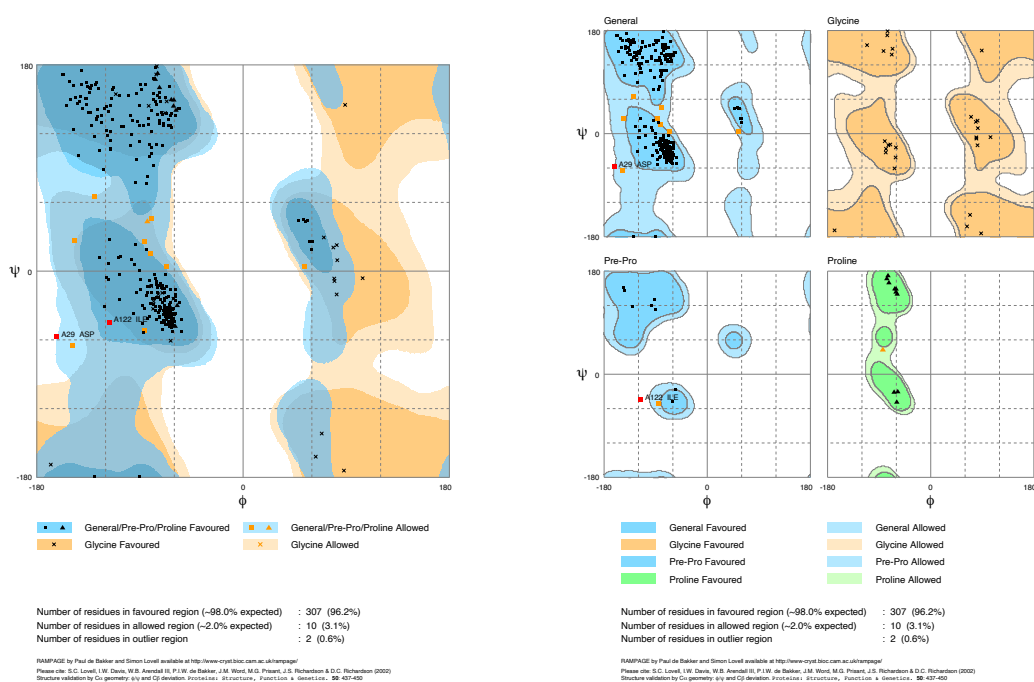

## 2.7.9 F1941A 4S,6S tetraketide 11p

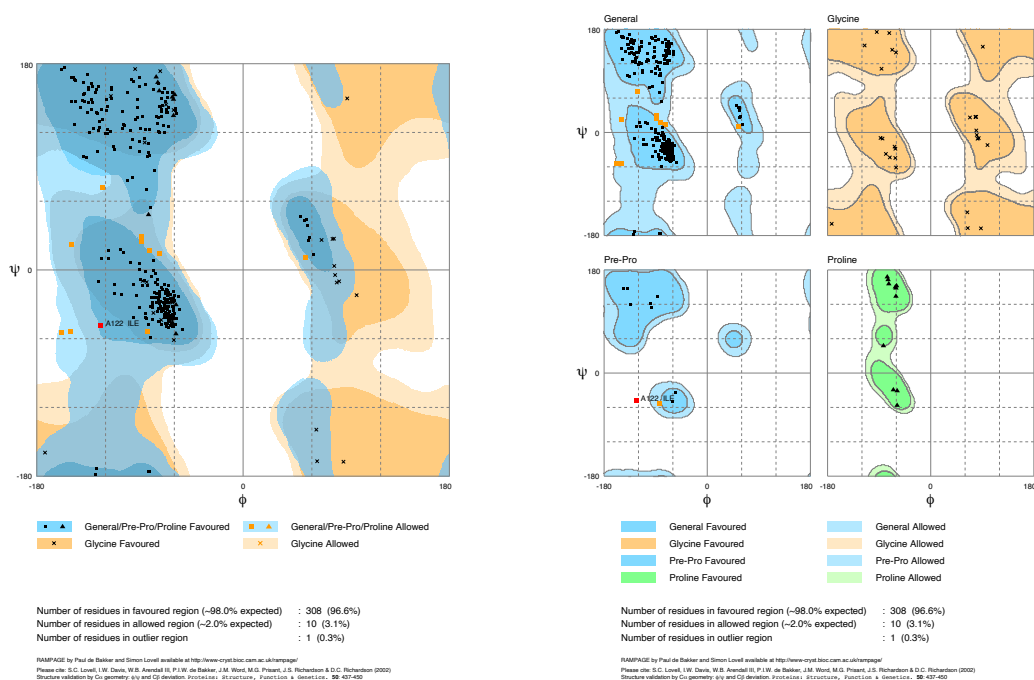



2.7.10

L2146A

Triketide 18p

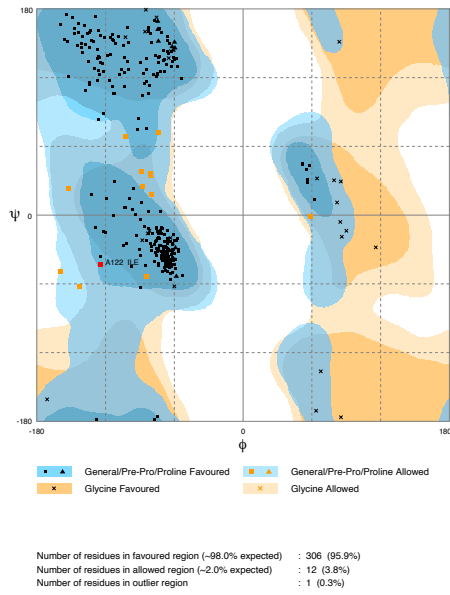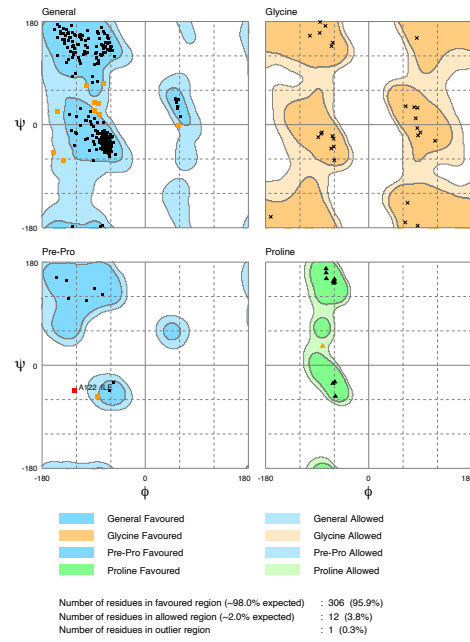

2.7.11

L2146A

Pentaketide 24p

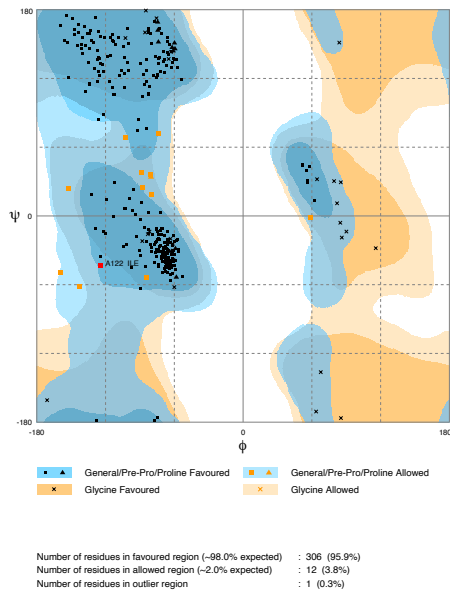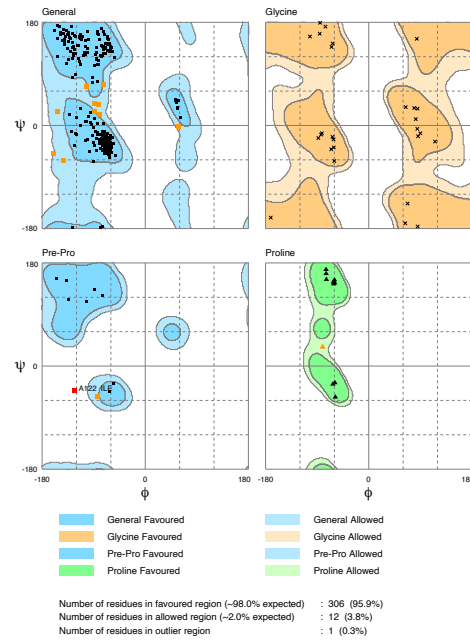

## 2.7.12

## L2146V

## Triketide 18p

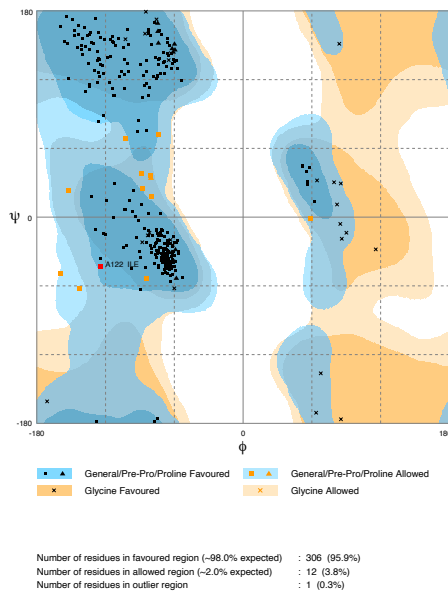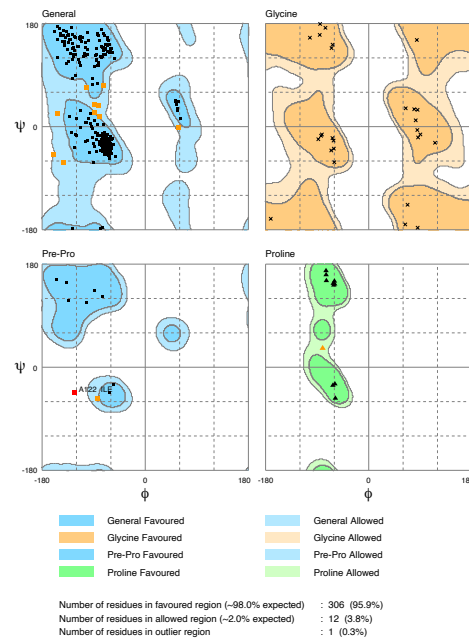

## 2.7.13

## L2146V

## Pentaketide 24p

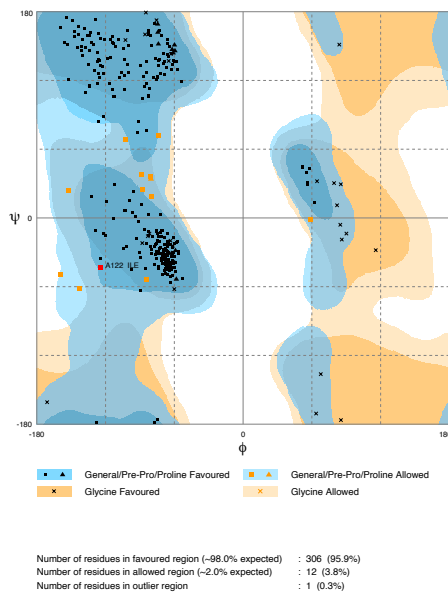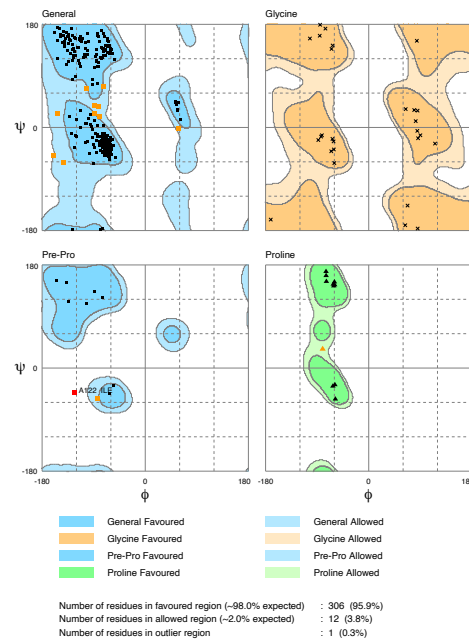

## 2.7.14 I2147A Triketide 18p

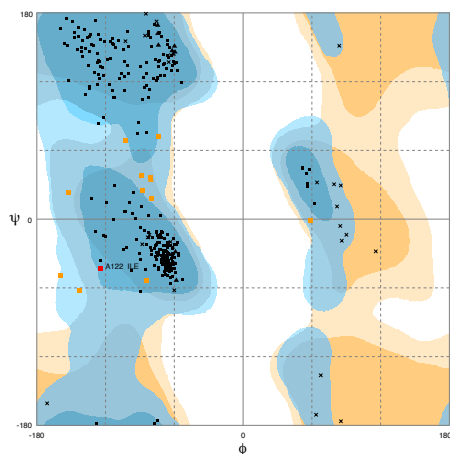

■ ▲ General/Pre-Pro/Proline Favoured    ■ ▲ General/Pre-Pro/Proline Allowed  
× Glycine Favoured    × Glycine Allowed

Number of residues in favoured region (~98.0% expected) : 306 (95.9%)  
 Number of residues in allowed region (~2.0% expected) : 12 (3.8%)  
 Number of residues in outlier region : 1 (0.3%)

RAMPAGE by Paul de Bakker and Simon Lovell available at <http://www-cryst.bio.cam.ac.uk/rampage/>  
 Please cite: S.C. Lovell, I.W. Davis, W.B. Apollo, P.J.W. de Bakker, J.M. Wood, M.G. Peppas, J.C. Richardson & D.C. Richardson (2002)  
 Structure validation by C $\alpha$  geometry,  $\psi$ - $\phi$  and C $\beta$  deviation. *Proteins: Structure, Function & Genetics*, **58**, 437-450

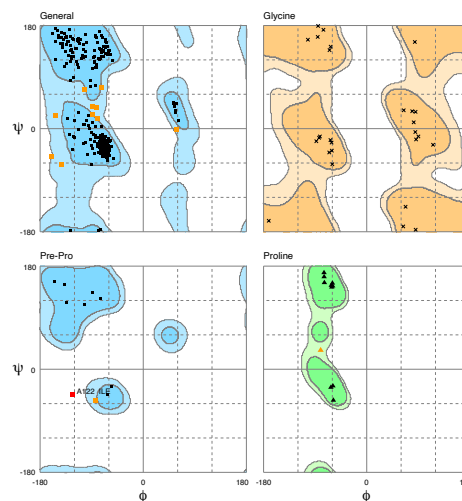

■ General Favoured    ■ General Allowed  
■ Glycine Favoured    ■ Glycine Allowed  
■ Pre-Pro Favoured    ■ Pre-Pro Allowed  
■ Proline Favoured    ■ Proline Allowed

Number of residues in favoured region (~98.0% expected) : 306 (95.9%)  
 Number of residues in allowed region (~2.0% expected) : 12 (3.8%)  
 Number of residues in outlier region : 1 (0.3%)

RAMPAGE by Paul de Bakker and Simon Lovell available at <http://www-cryst.bio.cam.ac.uk/rampage/>  
 Please cite: S.C. Lovell, I.W. Davis, W.B. Apollo, P.J.W. de Bakker, J.M. Wood, M.G. Peppas, J.C. Richardson & D.C. Richardson (2002)  
 Structure validation by C $\alpha$  geometry,  $\psi$ - $\phi$  and C $\beta$  deviation. *Proteins: Structure, Function & Genetics*, **58**, 437-450

## 2.7.15 I2147A Pentaketide 24p

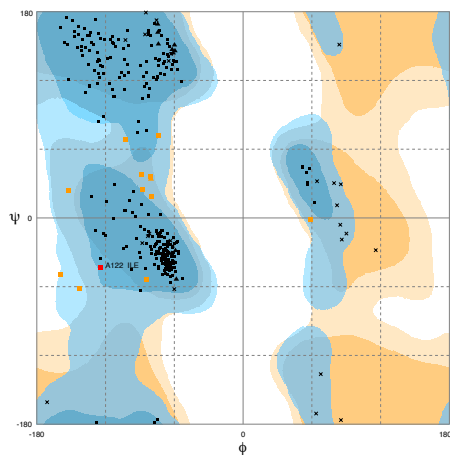

■ ▲ General/Pre-Pro/Proline Favoured    ■ ▲ General/Pre-Pro/Proline Allowed  
× Glycine Favoured    × Glycine Allowed

Number of residues in favoured region (~98.0% expected) : 306 (95.9%)  
 Number of residues in allowed region (~2.0% expected) : 12 (3.8%)  
 Number of residues in outlier region : 1 (0.3%)

RAMPAGE by Paul de Bakker and Simon Lovell available at <http://www-cryst.bio.cam.ac.uk/rampage/>  
 Please cite: S.C. Lovell, I.W. Davis, W.B. Apollo, P.J.W. de Bakker, J.M. Wood, M.G. Peppas, J.C. Richardson & D.C. Richardson (2002)  
 Structure validation by C $\alpha$  geometry,  $\psi$ - $\phi$  and C $\beta$  deviation. *Proteins: Structure, Function & Genetics*, **58**, 437-450

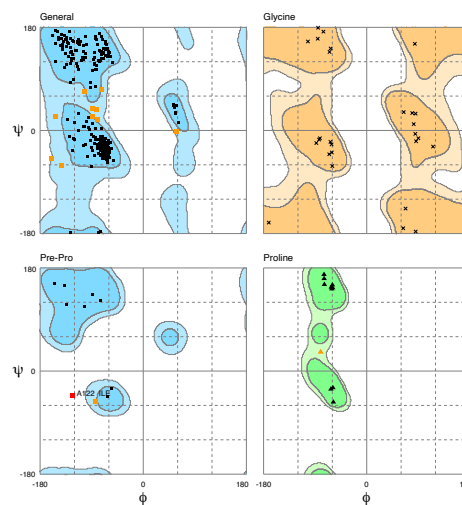

■ General Favoured    ■ General Allowed  
■ Glycine Favoured    ■ Glycine Allowed  
■ Pre-Pro Favoured    ■ Pre-Pro Allowed  
■ Proline Favoured    ■ Proline Allowed

Number of residues in favoured region (~98.0% expected) : 306 (95.9%)  
 Number of residues in allowed region (~2.0% expected) : 12 (3.8%)  
 Number of residues in outlier region : 1 (0.3%)

RAMPAGE by Paul de Bakker and Simon Lovell available at <http://www-cryst.bio.cam.ac.uk/rampage/>  
 Please cite: S.C. Lovell, I.W. Davis, W.B. Apollo, P.J.W. de Bakker, J.M. Wood, M.G. Peppas, J.C. Richardson & D.C. Richardson (2002)  
 Structure validation by C $\alpha$  geometry,  $\psi$ - $\phi$  and C $\beta$  deviation. *Proteins: Structure, Function & Genetics*, **58**, 437-450

## 2.7.16 F2157A Triketide 18p

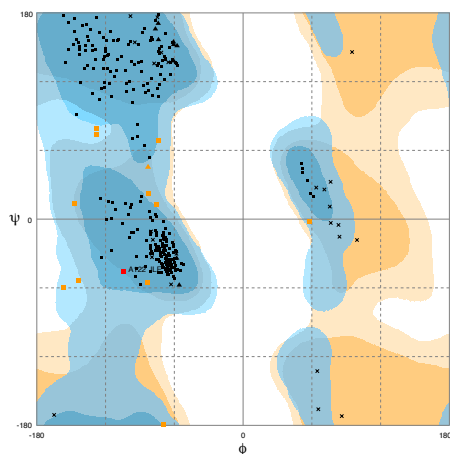

■ ▲ General/Pre-Pro/Proline Favoured    ■ ▲ General/Pre-Pro/Proline Allowed  
x Glycine Favoured    x Glycine Allowed

Number of residues in favoured region (~98.0% expected) : 306 (95.9%)  
 Number of residues in allowed region (~2.0% expected) : 12 (3.8%)  
 Number of residues in outlier region : 1 (0.3%)

RAMPAGE by Paul de Bakker and Simon Lovell available at <http://www-cryst.bio.cam.ac.uk/rampage/>  
 Please cite: S.C. Lovell, I.W. Davis, W.B. Appleton, P.J.W. de Bakker, J.M. Wood, M.G. Peacock, J.C. Richardson & D.C. Richardson (2002)  
 Structure validation by C $\alpha$  geometry,  $\psi$ - $\phi$  and C $\beta$ -deviation. *Proteins: Structure, Function & Genetics*, **39**, 437-450

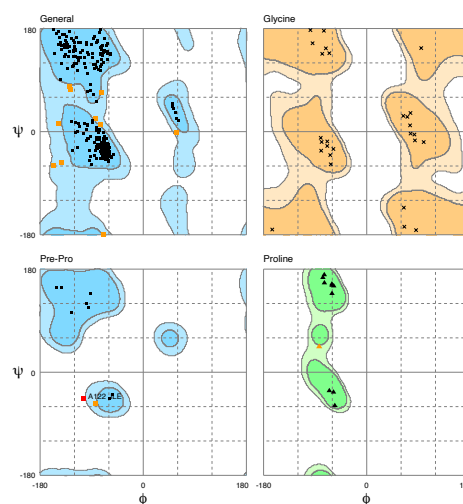

■ General Favoured    ■ General Allowed  
■ Glycine Favoured    ■ Glycine Allowed  
■ Pre-Pro Favoured    ■ Pre-Pro Allowed  
■ Proline Favoured    ■ Proline Allowed

Number of residues in favoured region (~98.0% expected) : 306 (95.9%)  
 Number of residues in allowed region (~2.0% expected) : 12 (3.8%)  
 Number of residues in outlier region : 1 (0.3%)

RAMPAGE by Paul de Bakker and Simon Lovell available at <http://www-cryst.bio.cam.ac.uk/rampage/>  
 Please cite: S.C. Lovell, I.W. Davis, W.B. Appleton, P.J.W. de Bakker, J.M. Wood, M.G. Peacock, J.C. Richardson & D.C. Richardson (2002)  
 Structure validation by C $\alpha$  geometry,  $\psi$ - $\phi$  and C $\beta$ -deviation. *Proteins: Structure, Function & Genetics*, **39**, 437-450

## 2.7.17 F2157A Pentaketide 24p

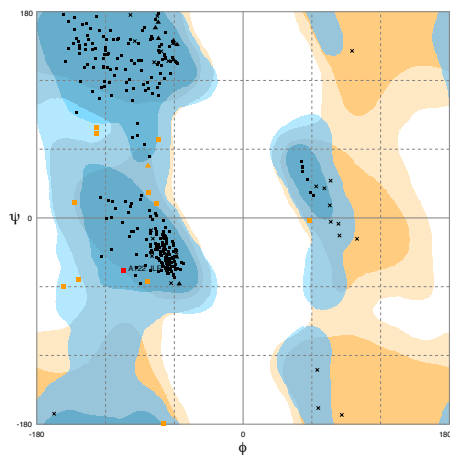

■ ▲ General/Pre-Pro/Proline Favoured    ■ ▲ General/Pre-Pro/Proline Allowed  
x Glycine Favoured    x Glycine Allowed

Number of residues in favoured region (~98.0% expected) : 306 (95.9%)  
 Number of residues in allowed region (~2.0% expected) : 12 (3.8%)  
 Number of residues in outlier region : 1 (0.3%)

RAMPAGE by Paul de Bakker and Simon Lovell available at <http://www-cryst.bio.cam.ac.uk/rampage/>  
 Please cite: S.C. Lovell, I.W. Davis, W.B. Appleton, P.J.W. de Bakker, J.M. Wood, M.G. Peacock, J.C. Richardson & D.C. Richardson (2002)  
 Structure validation by C $\alpha$  geometry,  $\psi$ - $\phi$  and C $\beta$ -deviation. *Proteins: Structure, Function & Genetics*, **39**, 437-450

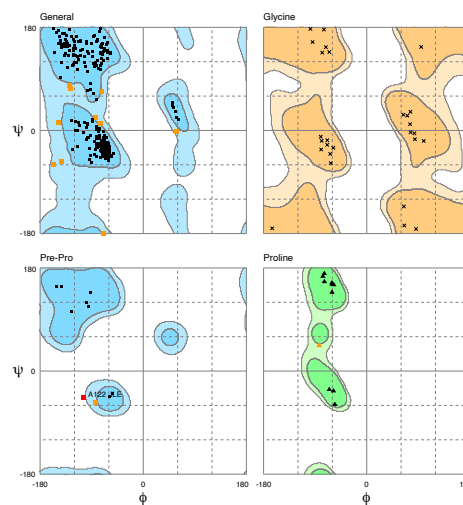

■ General Favoured    ■ General Allowed  
■ Glycine Favoured    ■ Glycine Allowed  
■ Pre-Pro Favoured    ■ Pre-Pro Allowed  
■ Proline Favoured    ■ Proline Allowed

Number of residues in favoured region (~98.0% expected) : 306 (95.9%)  
 Number of residues in allowed region (~2.0% expected) : 12 (3.8%)  
 Number of residues in outlier region : 1 (0.3%)

RAMPAGE by Paul de Bakker and Simon Lovell available at <http://www-cryst.bio.cam.ac.uk/rampage/>  
 Please cite: S.C. Lovell, I.W. Davis, W.B. Appleton, P.J.W. de Bakker, J.M. Wood, M.G. Peacock, J.C. Richardson & D.C. Richardson (2002)  
 Structure validation by C $\alpha$  geometry,  $\psi$ - $\phi$  and C $\beta$ -deviation. *Proteins: Structure, Function & Genetics*, **39**, 437-450

## 2.7.18 L2146A/I2147A Triketide 18p

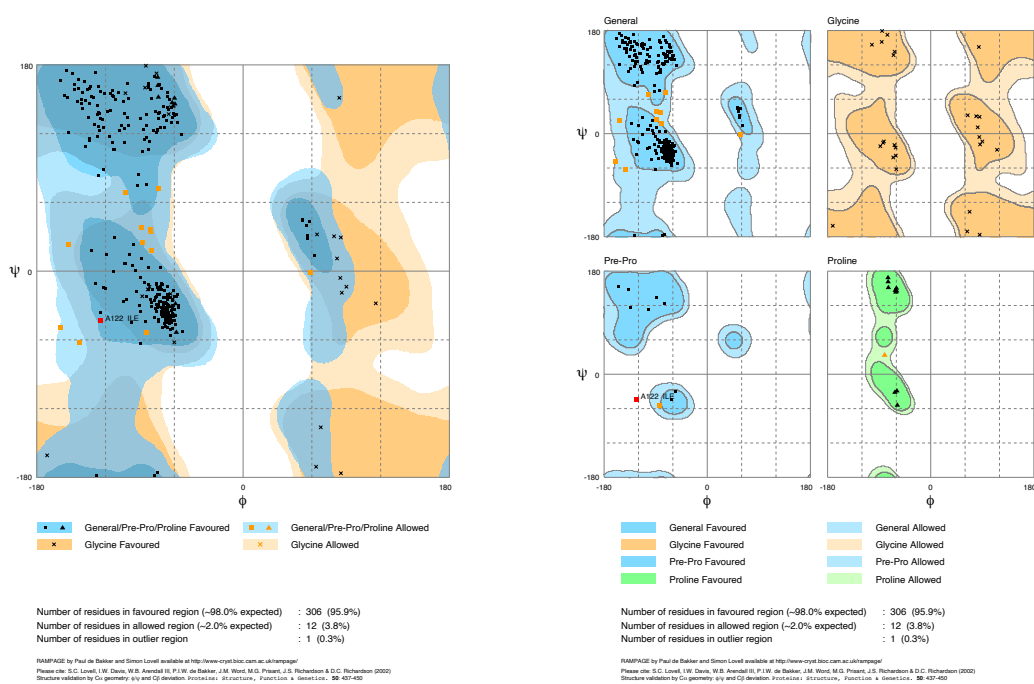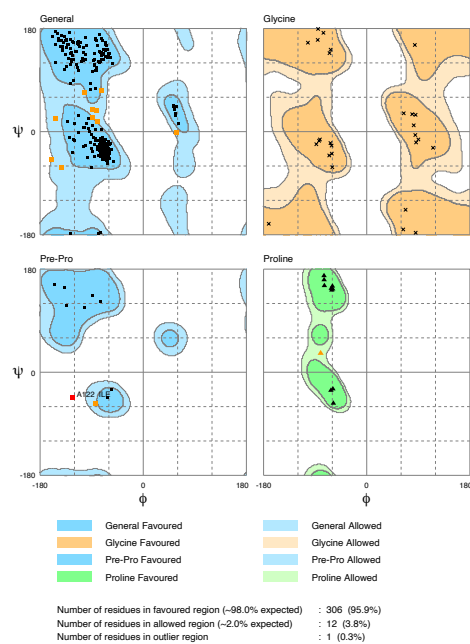

## 2.7.19 L2146A/I2147A Pentaketide 24p

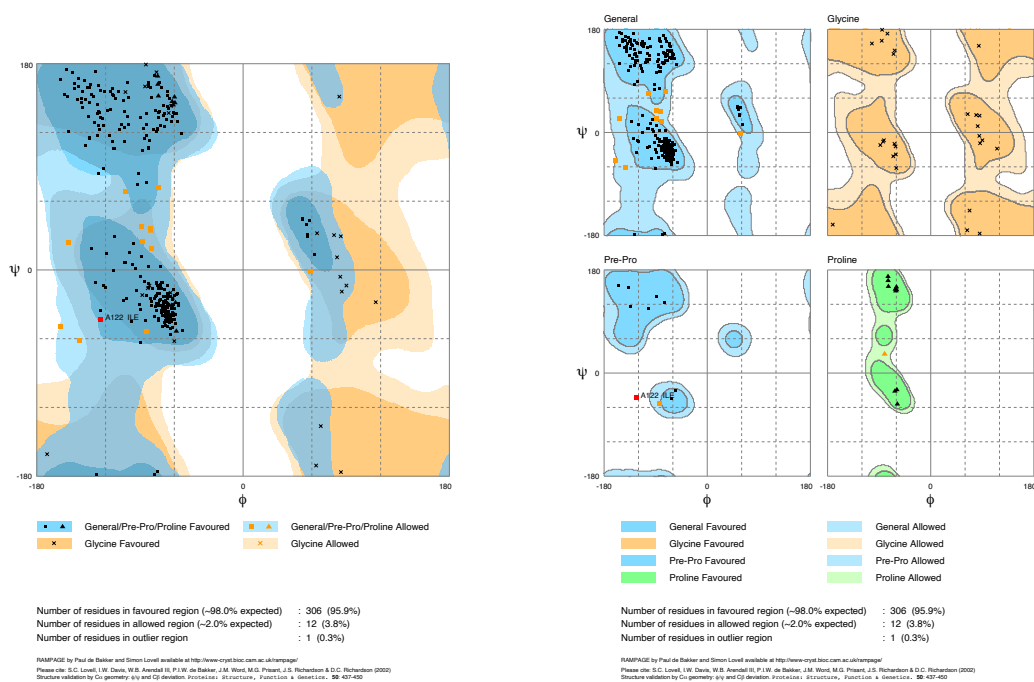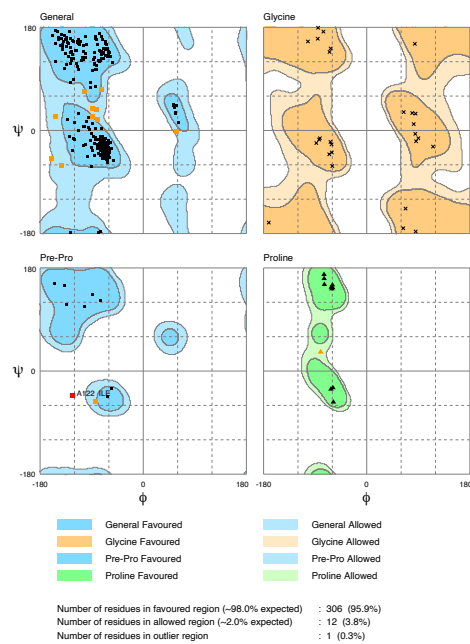

## 2.7.20 I2147A/F2157V Triketide 18p

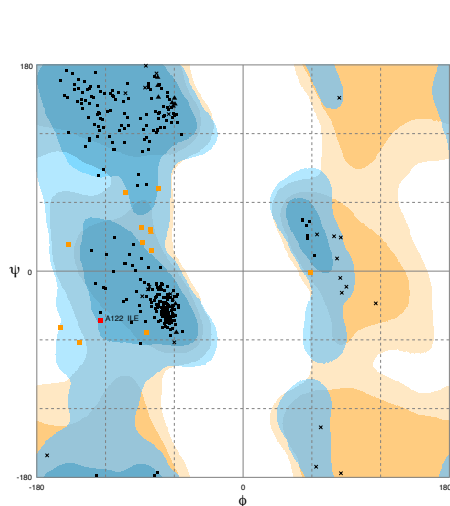

■ ▲ General/Pre-Pro/Proline Favoured    ■ ▲ General/Pre-Pro/Proline Allowed  
× Glycine Favoured    × Glycine Allowed

Number of residues in favoured region (~98.0% expected) : 306 (95.9%)  
 Number of residues in allowed region (~2.0% expected) : 12 (3.8%)  
 Number of residues in outlier region : 1 (0.3%)

RAMPAGE by Paul de Bakker and Simon Lovell available at <http://www-cryst.bioc.cam.ac.uk/rampage/>  
 Please cite: S.C. Lovell, I.W. Davis, W.B. Arnold III, P.J.W. de Bakker, J.M. Wood, M.G. Prasad, J.S. Richardson & D.C. Richardson (2002)  
 Structure validation by C $\alpha$  geometry and  $\psi$  and  $\phi$  deviation. *Protein Sci.* 11:1274-1282.

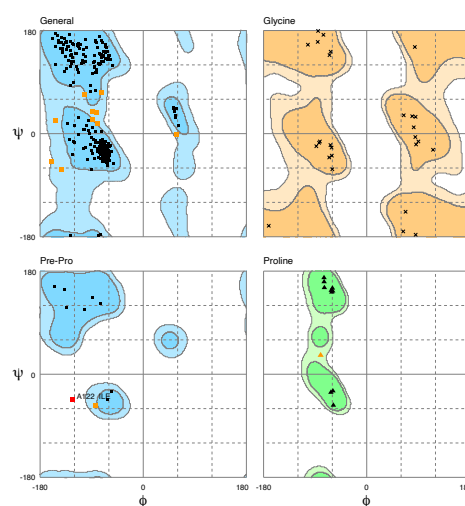

■ General Favoured    ■ General Allowed  
■ Glycine Favoured    ■ Glycine Allowed  
■ Pre-Pro Favoured    ■ Pre-Pro Allowed  
■ Proline Favoured    ■ Proline Allowed

Number of residues in favoured region (~98.0% expected) : 306 (95.9%)  
 Number of residues in allowed region (~2.0% expected) : 12 (3.8%)  
 Number of residues in outlier region : 1 (0.3%)

RAMPAGE by Paul de Bakker and Simon Lovell available at <http://www-cryst.bioc.cam.ac.uk/rampage/>  
 Please cite: S.C. Lovell, I.W. Davis, W.B. Arnold III, P.J.W. de Bakker, J.M. Wood, M.G. Prasad, J.S. Richardson & D.C. Richardson (2002)  
 Structure validation by C $\alpha$  geometry and  $\psi$  and  $\phi$  deviation. *Protein Sci.* 11:1274-1282.

## 2.7.21 I2147A/F2157V Pentaketide 24p

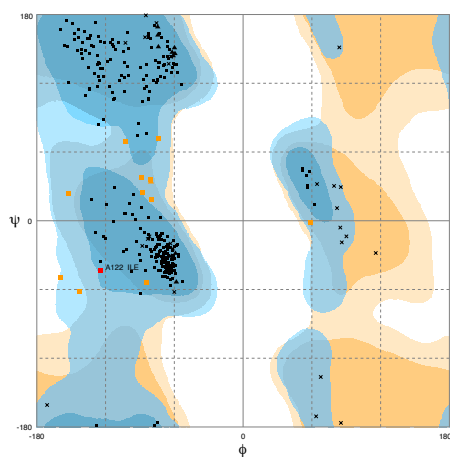

■ ▲ General/Pre-Pro/Proline Favoured    ■ ▲ General/Pre-Pro/Proline Allowed  
× Glycine Favoured    × Glycine Allowed

Number of residues in favoured region (~98.0% expected) : 306 (95.9%)  
 Number of residues in allowed region (~2.0% expected) : 12 (3.8%)  
 Number of residues in outlier region : 1 (0.3%)

RAMPAGE by Paul de Bakker and Simon Lovell available at <http://www-cryst.bioc.cam.ac.uk/rampage/>  
 Please cite: S.C. Lovell, I.W. Davis, W.B. Arnold III, P.J.W. de Bakker, J.M. Wood, M.G. Prasad, J.S. Richardson & D.C. Richardson (2002)  
 Structure validation by C $\alpha$  geometry and  $\psi$  and  $\phi$  deviation. *Protein Sci.* 11:1274-1282.

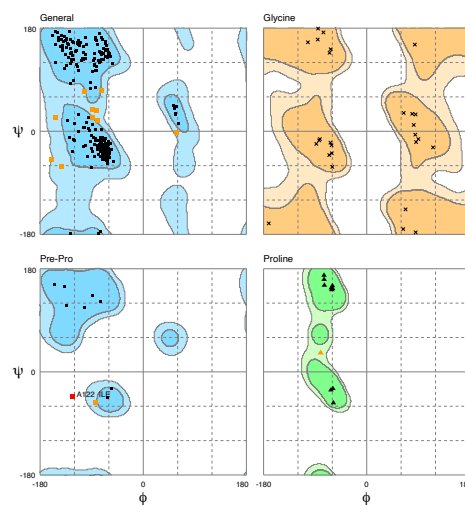

■ General Favoured    ■ General Allowed  
■ Glycine Favoured    ■ Glycine Allowed  
■ Pre-Pro Favoured    ■ Pre-Pro Allowed  
■ Proline Favoured    ■ Proline Allowed

Number of residues in favoured region (~98.0% expected) : 306 (95.9%)  
 Number of residues in allowed region (~2.0% expected) : 12 (3.8%)  
 Number of residues in outlier region : 1 (0.3%)

RAMPAGE by Paul de Bakker and Simon Lovell available at <http://www-cryst.bioc.cam.ac.uk/rampage/>  
 Please cite: S.C. Lovell, I.W. Davis, W.B. Arnold III, P.J.W. de Bakker, J.M. Wood, M.G. Prasad, J.S. Richardson & D.C. Richardson (2002)  
 Structure validation by C $\alpha$  geometry and  $\psi$  and  $\phi$  deviation. *Protein Sci.* 11:1274-1282.



## 2.7.22 F1941A/F2157A Triketide 18p

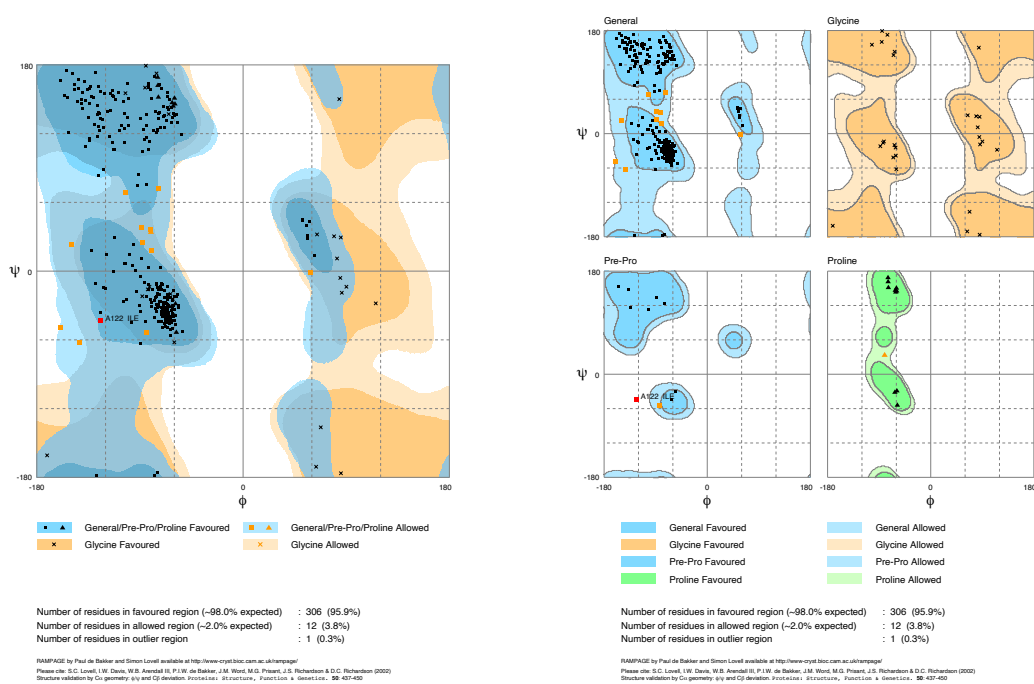

## 2.7.23 F1941A/F2157A Pentaketide 24p

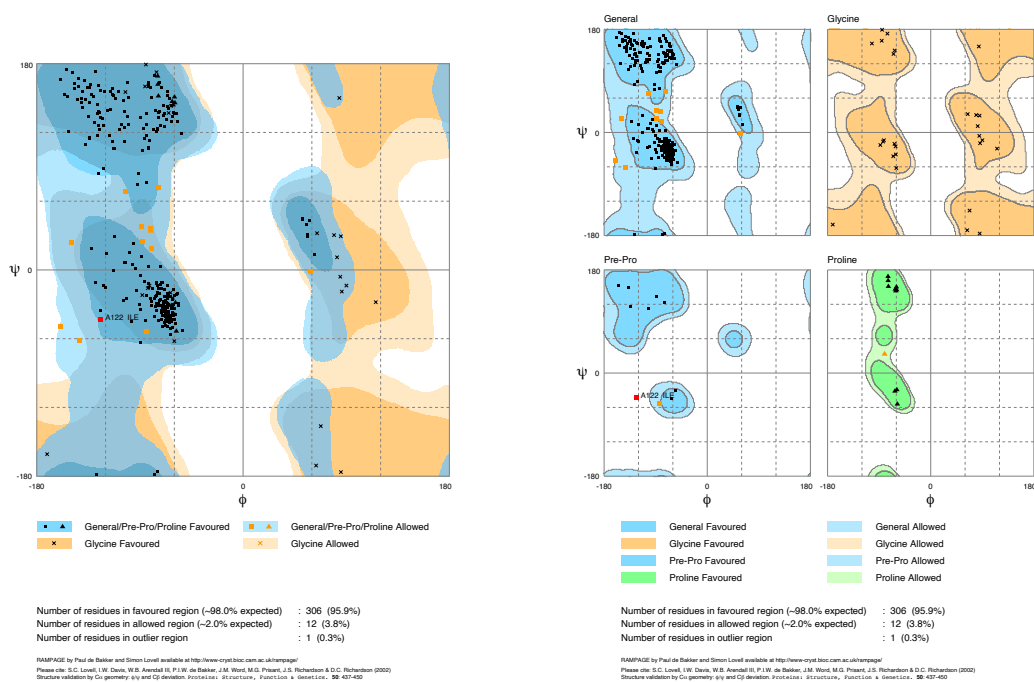

## 2.7.24 F1941A/I2147A/F2157V Triketide 18p

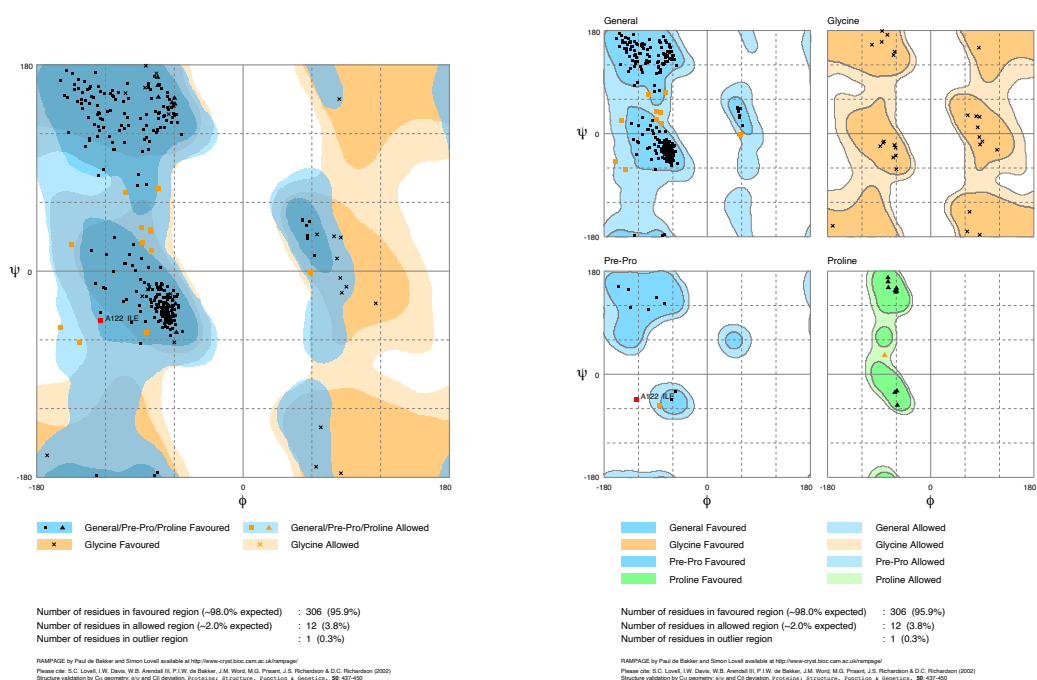

## 2.7.25 F1941A/I2147A/F2157V Pentaketide 24p

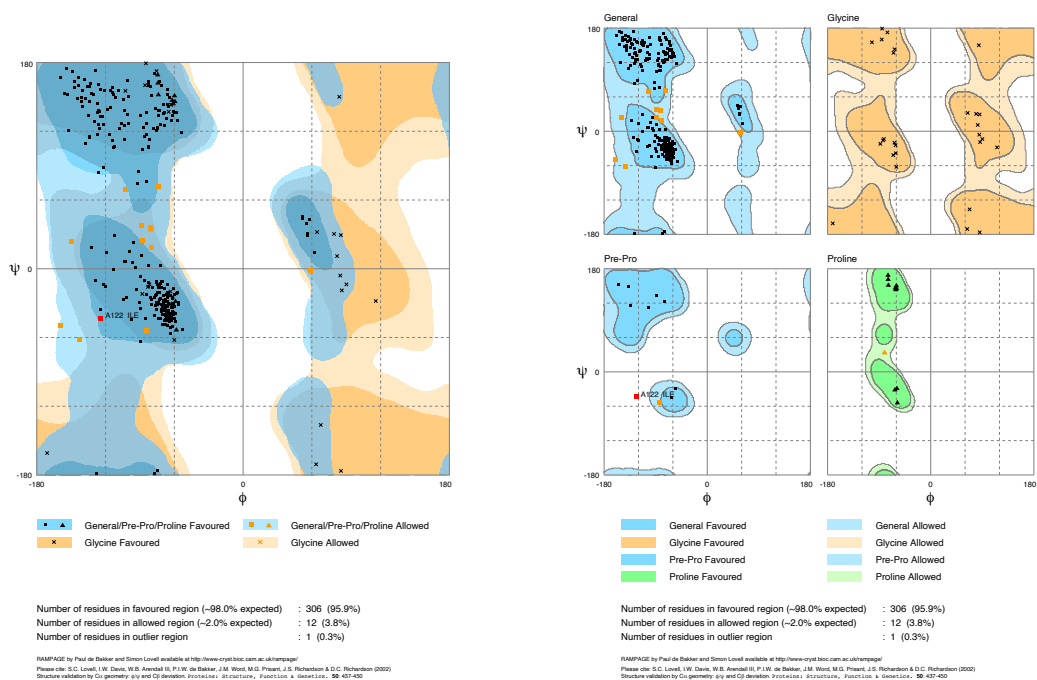

2.7.26

F1941A/I2147A/F2157V Tetraketide 11p

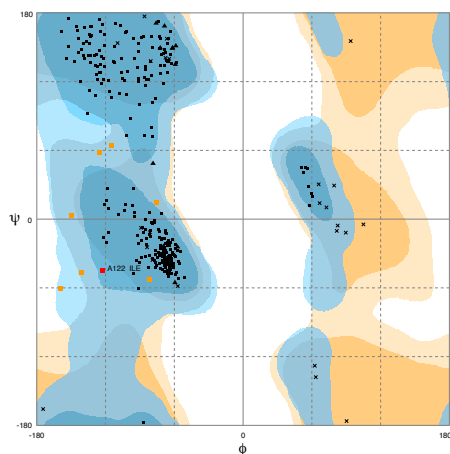

▲ General/Pre-Pro/Proline Favoured    ▲ General/Pre-Pro/Proline Allowed  
× Glycine Favoured                    × Glycine Allowed

Number of residues in favoured region (-98.0% expected) : 311 (97.5%)  
 Number of residues in allowed region (-2.0% expected) : 7 (2.2%)  
 Number of residues in outlier region : 1 (0.3%)

RAMPAGE by Paul de Bakker and Simon Lovell available at <http://www.crysl.bmc.com.au/rampage/>  
 Please cite: S.C. Lovell, I.W. Davis, W.D. Axford III, P.J.W. de Bakker, J.M. Wood, M.G. Fraser, J.C. Richardson & D.C. Richardson (2002)  
 Structure validation by C $\alpha$  geometry and  $\phi$  and  $\psi$  distribution. *Protein Sci.* 11:1301-1313. doi:10.1002/pro.1050

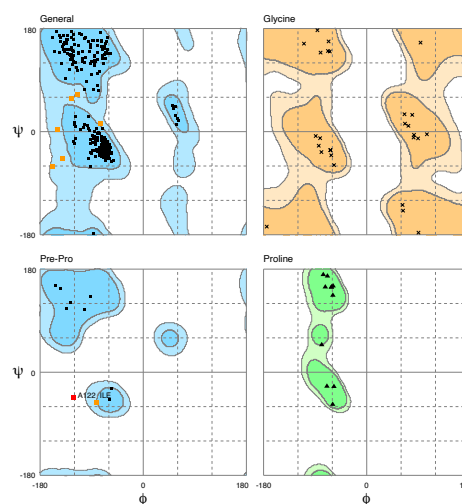

■ General Favoured                    ■ General Allowed  
■ Glycine Favoured                    ■ Glycine Allowed  
■ Pre-Pro Favoured                    ■ Pre-Pro Allowed  
■ Proline Favoured                    ■ Proline Allowed

Number of residues in favoured region (-98.0% expected) : 311 (97.5%)  
 Number of residues in allowed region (-2.0% expected) : 7 (2.2%)  
 Number of residues in outlier region : 1 (0.3%)

RAMPAGE by Paul de Bakker and Simon Lovell available at <http://www.crysl.bmc.com.au/rampage/>  
 Please cite: S.C. Lovell, I.W. Davis, W.D. Axford III, P.J.W. de Bakker, J.M. Wood, M.G. Fraser, J.C. Richardson & D.C. Richardson (2002)  
 Structure validation by C $\alpha$  geometry and  $\phi$  and  $\psi$  distribution. *Protein Sci.* 11:1301-1313. doi:10.1002/pro.1050

### 3.0 General Methods and Equipment

**3.1 NMR Analysis:**  $^1\text{H}$ -NMR analysis was performed using BRUKER DPX 200, Avance 400, DPX 400 and DRX 500 instruments. Signals are determined in some cases with two dimensional NMR  $^1\text{H}$ ,  $^1\text{H}$ -COSY,  $^{13}\text{C}$ -HSQC and  $^1\text{H}$ ,  $^{13}\text{C}$ - $J_3$ -HMBC.  $^{13}\text{C}$ -NMR analysis was performed using BRUKER Avance 400, DPX 400 and DRX 500 instruments. Deuterated chloroform (ref. 7.26 ppm / 77.2 ppm)<sup>10</sup> and deuterated acetonitrile (ref. 1.94 ppm / 118.4 ppm) were used as solvents and served as internal references. All  $\delta$  values are reported in ppm. All  $J$  values are reported in Hz.

**3.2 Column Chromatography:** For column chromatography silicagel 60 (particle size 35-70 micron, Sigma-Aldrich or 40-63 micron, Macherey-Nagel) was used. Columns were packed wet under  $\text{N}_2$  pressure. Products were eluted with the indicated solvent mixtures. Purified fractions were analysed by TLC and combined if same  $R_f$  was observed. Final products were evaporated in *vacuo*.

**3.3 TLC:** TLC analysis was performed on TLC plates with a polyester backed 0.2 mm silica gel phase from Macherey and Nagel using the indicated solvent systems. Analysis of the plates were performed by ultraviolet light (254 nm) or with potassium permanganate (5 mmol) or *o*-anisaldehyde (anisaldehyde [15 g], EtOH [250 ml] and concentrated  $\text{H}_2\text{SO}_4$  [2.5 ml]) solution.

**3.4 Analytical LCMS:** Analytical LCMS data were obtained with using a Waters LCMS system comprising of a Waters 2767 autosampler, Waters 2545 pump system, a Phenomenex Kinetex column (2.6  $\mu$ ,  $\text{C}_{18}$ , 100  $\text{\AA}$ , 4.6  $\times$  100 mm) equipped with a Phenomenex Security Guard precolumn (Luna  $\text{C}_5$  300  $\text{\AA}$ ) eluted at 1 mL/min. Detection was by Waters 2998 Diode Array detector between 200 and 600 nm; Waters 2424 ELSD and Waters SQD-2 mass detector operating simultaneously in  $\text{ES}^+$  and  $\text{ES}^-$  modes between 100  $m/z$  and 650  $m/z$ . Solvents were: **A**, HPLC grade  $\text{H}_2\text{O}$  containing 0.05% formic acid; **B**, HPLC grade MeOH containing 0.045% formic acid; and **C**, HPLC grade  $\text{CH}_3\text{CN}$  containing 0.045% formic acid. Gradients were as follows. *Method 1*. Kinetex/ $\text{CH}_3\text{CN}$ : 0 min, 10% C; 10 min, 90% C; 12 min, 90% C; 13 min, 10% C; 15 min, 10% C.

**3.5 Preparative LCMS:** Purification of final compounds was generally achieved using a Waters mass-directed autopurification system comprising of a Waters 2767 autosampler, Waters 2545 pump system, a Phenomenex Kinetex Axia column (5 $\mu$ ,  $\text{C}_{18}$ , 100  $\text{\AA}$ , 21.2  $\times$  250 mm) equipped with a Phenomenex Security Guard precolumn (Luna  $\text{C}_5$  300  $\text{\AA}$ ) eluted at 20 mL/min at ambient temperature. Solvent **A**, HPLC grade  $\text{H}_2\text{O}$  + 0.05% formic acid; Solvent **B**, HPLC grade  $\text{CH}_3\text{CN}$  + 0.045% formic acid. The post-column flow was split (100:1) and the minority flow was made up with

HPLC grade CH<sub>3</sub>CN + 0.045% formic acid to 1 mL·min<sup>-1</sup> for simultaneous analysis by diode array (Waters 2998), evaporative light scattering (Waters 2424) and ESI mass spectrometry in positive and negative modes (Waters SQD-2). Detected peaks were collected into glass test tubes. Combined tubes were evaporated (vacuum centrifuge), weighed, and residues dissolved directly in solvent for use or analysis.

**3.6 Protein Purification:** The protein purification was performed with an FPLC ÄKTA Pure system (GE Healthcare). For FPLC analysis a combination with the software UNICORN 7.0 and different columns (Nickel column Protino Ni-NTA Columns 5 mL, Size exclusion column- HiLoad 26/600 Superdex 200pg (GE Healthcare), 320 mL) was used.

**3.7 UV-Analysis:** UV assays were measured at 340 nm with a JASCO-V630-spectrophotometer in quartz glass cuvettes with a depth of 10 mm. The temperature was controlled by the JASCO-V630-Spectrophotometer at 25 °C. The processed data (by JASCO/Spectramanager) was collected and then analysed in Microsoft EXCEL.

### 3.8 Buffers, Antibiotics, Media and Solutions

All enzymes used in this work were purchased from Thermo Fisher Scientific (Waltham, MA, USA), Takara Bio Inc. (Shiga, J), Invitrogen Life Technologies (Darmstadt, D), or Bioline (London, UK). All enzymes were used according to manufacturer's instructions with appropriate supplied buffers. Buffers and media used in this work were sterilised by autoclaving 15 min at 121 °C (Autoclave 2100 Classic, Prestige Medical) or by disposable sterile filter (0.45 µm pore size, Roth) and are summarized in tables S3.8A and S3.8B7.

**Table S3.8A:** Media used in this work

| Media | Composition [% (w/v)] | Ingredients                             |
|-------|-----------------------|-----------------------------------------|
| 2TY   | 1                     | Yeast extract                           |
|       | 0.5                   | Sodium chloride                         |
|       | 1.6                   | Tryptone                                |
| LB    | 0.5                   | Yeast extract                           |
|       | 1                     | Tryptone                                |
|       | 0.5                   | Sodium chloride                         |
| SOC   | 0.5                   | Yeast extract                           |
|       | 2                     | Tryptone                                |
|       | 0.06                  | Sodium chloride                         |
|       | 0.02                  | Potassium chloride                      |
|       | 25 mM                 | Magnesium chloride × 6 H <sub>2</sub> O |
|       | 1                     | D(+)-Glucose                            |

**Table S3.8B:** Agar used in this work

| Agar    | Composition [%<br>(w/v)] | Ingredients     |
|---------|--------------------------|-----------------|
| LB agar | 0.5                      | Yeast extract   |
|         | 1                        | Tryptone        |
|         | 0.5                      | Sodium chloride |
|         | 1.5                      | Agar            |

Antibiotics stock solutions were prepared in distilled water or ethanol. They were filter sterilized through 0.45  $\mu\text{m}$  syringe filter and stored at  $-20\text{ }^{\circ}\text{C}$ . Stock and working concentrations are listed in table S3.8C.

**Table S3.8C:** Agar used in this work

| Antibiotic    | Solvent          | Stock concentration [mg / ml] | Working concentration [ $\mu\text{g}$ / ml] |
|---------------|------------------|-------------------------------|---------------------------------------------|
| Carbenicillin | H <sub>2</sub> O | 50                            | 50                                          |
| Kanamycin     | H <sub>2</sub> O | 50                            | 50                                          |

Information about *E. coli* strains used in this work are summarized in table S3.8D.

**Table S3.8D:** *E. coli* strains used in this work

| Bacteria                          | Reference                |
|-----------------------------------|--------------------------|
| BL21 (DE3)                        | Thermo Fisher Scientific |
| OneShot <i>ccdB</i> survival 2T1R | Thermo Fisher Scientific |
| OneShot Top10                     | Thermo Fisher Scientific |



## **4.0 Preparation of WT and Mutant ER domains and Assay Procedures**

### **4.1 SQTKS ER Domain**

#### **4.1.1 Transformation of pET28-SQTKS-ER into *E. coli* Top10**

50 µl chemically competent *E. coli* Top10 cells were thawed on ice and incubated on ice for 30 min with 1 µl of the appropriate vector. Subsequently heat shock transformation was performed, therefore, the cells were incubated at 42 °C for 30 s, then immediately chilled on ice for 2 min. 250 µl SOC medium were added. The transformed cells were shaken (350 rpm) for 1 h at 37 °C. Positive clones were selected by plating 50 - 150 µl of the cells on solid LB medium containing the appropriate antibiotic. The cells were grown over night at 37 °C

#### **4.1.2 Transformation of pET28-SQTKS-ER into *E. coli* BL21**

50 µl chemically competent *E. coli* BL 21 cells were thawed on ice and incubated on ice for 30 min with 1 µl of the SQTKS-ER-domain. Subsequently heat shock transformation was performed, therefore, the cells were incubated at 42 °C for 10 s, then immediately chilled on ice for 2 min. 800 µl SOC medium were added. The transformed cells were shaken (350 rpm) for 1 h at 37 °C. Positive clones were selected by plating 50 - 150 µl of the cells on solid LB medium containing the appropriate antibiotic. The cells were grown over night at 37 °C.

#### **4.1.3 Protein Expression and Purification**

A starter culture was prepared by scraping the surface of a glycerol stock of *E.coli* BL21 transformed with pET28a-ER. The cells were grown in LB media with kanamycin (50 mg/mL) and incubated at 37 °C, 180 rpm, overnight. 0.5 ml of the starter culture was added to 100 mL 2TY media. The cells were incubated to an OD<sub>600</sub> of 0.6, then the flask was cooled down to 16 °C and induced with 50 µl 1M IPTG solution. This solution was incubated over night at 16 °C, 180 rpm.

To isolate the protein, the media was centrifuged at 7000 rpm for 30 min and the pellet was collected. The cells could be used immediately or frozen at -20 °C. The cells were suspended in 50 ml of nickel column wash buffer (50 mM Tris pH 8, 150 mM NaCl, 10% glycerol (v/v) and 20 mM imidazole) and sonicated on ice for 6.5 minutes. Every 30 second the sonicator was switched on and of. The rest of the solution was centrifuged at 8500 rpm for 30 min, filtered and purified by a nickel column\*. For this a linear gradient of elution buffer (50 mM Tris pH 8, 150 mM NaCl, 10% glycerol (v/v) and 0.5 M imidazole) was used. The fractions were checked by SDS gel and the fractions with the correct mass were combined and concentrated. A second purification was done by a size exclusion column chromatography\*\*. The protein solution was loaded onto the column and eluted with size exclusion elution buffer (Buffer: 50 mM Tris pH 8, 150 mM NaCl, 20% glycerol (v/v)). The fractions

were analyzed again by SDS gel and the protein with the correct mass and high purity was combined and concentrated. The concentration of protein was estimated by a calculated absorption coefficient  $\epsilon = 0.69$  at 280 nm. After that the protein was divided into several aliquots and stored at  $-4\text{ }^{\circ}\text{C}$ .

\*Nickel column Protino Ni-NTA Columns 5 mL

\*\*Size exclusion column- HiLoad 26/600 Superdex 200pg (GE Healthcare), 320 ml).

#### 4.1.4 Colony Polymerase Chain Reaction

The successful transformation of BL21 cells was configured by Colony-PCR. For a Colony-PCR the template was added by transferring a small part of a single *E.coli* colony into the reaction mixture using a sterile toothpick. For each primer pair the specific annealing temperature was determined in a PCR temperature gradient. A typical Colony-PCR contained:

|                   |                    |
|-------------------|--------------------|
| 0.2 $\mu\text{l}$ | Forward Primer     |
| 0.2 $\mu\text{l}$ | Reverse Primer     |
| -                 | Picked DNA         |
| 2.5 $\mu\text{l}$ | One Taq Master Mix |
| 7.1 $\mu\text{l}$ | Water              |

---

Total: 10  $\mu\text{l}$

#### 4.1.5 Bradford Assay

Standard solutions of bovine serum albumin (0.1-2 ml/ml) in size exclusion buffer [50 mM Tris pH 8, 150 mM NaCl, 20% glycerol (v/v)] were prepared by serial dilution. 100  $\mu\text{l}$  of the standards were mixed with Bradford dye reagent (1 ml) and incubated for 15 min at RT. The absorption of each sample was measured at 595 nm against a standard (size exclusion buffer 100  $\mu\text{l}$ , Bradford dye reagent, 1 ml) to construct a standard concentration curve. A sample of the protein to be quantified (20  $\mu\text{l}$ ) was diluted in size exclusion buffer (80  $\mu\text{l}$ ) and treated with Bradford dye reagent (1ml). This was incubated at room temperature for 15 mins and then the absorption was measured at 595 nm. This was compared to the previously prepared concentration curve to calculate the amount of protein that had been produced.

#### 4.2 SQTKS ER-Domain Enzyme Assay

ER activity assays are performed in a total volume of 400  $\mu\text{l}$ . The concentration of NADPH (10  $\mu\text{L}$  of 10 mM stock) and SQTKS-ER-domain (20  $\mu\text{L}$  of a  $1.0\text{ mg}\cdot\text{ml}^{-1}$  stock solution) and the temperature at  $25\text{ }^{\circ}\text{C}$  were kept constant in all assays. The amount of buffer (50 mM Tris pH 8.0, 150 mM NaCl,

20% Glycerol, 290-365  $\mu$ L) and substrate (5-80  $\mu$ L of 5 mM Stock) varied between the assays. The assays are performed in cuvettes under measuring the UV absorption at 340 nm.

### **4.3 Mutagenesis**

#### **4.3.1 Plasmid Isolation**

For the isolation of the plasmid first an overnight culture of *E-coli* Top10 cells with the desired plasmid were cultivated. The next day the cell culture was centrifuged in a 2 ml Eppendorf-tube at 13.000 g for 2 min and 4 °C. Afterwards the supernatant was discarded and the previous step was repeated with the remaining overnight culture, if necessary. The pellet was resuspended in 100  $\mu$ l Solution (5 mM Glucose, 25 mM Tris-HCl (pH 8.0) and 10 mM EDTA) and 5  $\mu$ l RNase. The sample was incubated for 5 min by RT. 200  $\mu$ l of Solution II (0.2 M NaOH and 1% SDS) was added. It was mixed carefully by inversion. Incubated 5 min by RT. 150  $\mu$ l Solution III was added (60 ml 5M Potassium acetate, 11.5 ml conc. acetic acid and 20.5 ml H<sub>2</sub>O) and mixed carefully by inversion. The mixture was centrifuged by 11 000 g for 5 min by 4 °C. The supernatant was transferred to a new 1.5 ml Eppendorf-tube. Then 800  $\mu$ l EtOH (96%, bio quality) and 45  $\mu$ l 3 M Na-Acetate were added, inverted and to precipitate the plasmid DNA 30 min by -20 °C incubated. Afterwards by 11 000 g for 5 min by 4 °C centrifuged. Then the supernatant was discarded and the pellet was washed with 70% EtOH (bio quality) (100  $\mu$ l). Afterwards the suspension was centrifuged at max speed for 5 min at RT. Then the supernatant discarded and pellet was dried by 37 °C for 15 min until it was clear. The pellet was resuspended in 20  $\mu$ l Water and could be stored at -20 °C for further use.

#### **4.3.2 Site Directed Mutagenesis<sup>11</sup>**

For the site directed mutagenesis, different Oligo-primers were ordered from Sigma Aldrich and used in different combinations. Hereby non-overlapping primer pairs were tested.

As a template the vector pET28a containing the ER sequence of SQTKS was chosen. Two different PCR approaches with different polymerases were tested. The first approach contained the Q5 High-Fidelity DNA polymerase the other the Phusion High-Fidelity DNA polymerase.

### Q5 High-Fidelity DNA polymerase

|                 |                           |
|-----------------|---------------------------|
| 12.5 $\mu$ l    | Q5 Master Mix             |
| 1.25 $\mu$ l    | Forward Primer            |
| 1.25 $\mu$ l    | Reverse Primer            |
| 1 $\mu$ l       | Plasmid DNA               |
| (6.5–9 $\mu$ l) | Water                     |
| (0–2.5 $\mu$ l) | MgCl <sub>2</sub> (50 nM) |

---

Total: 25  $\mu$ l

### Phusion High-Fidelity DNA polymerase

|                   |                           |
|-------------------|---------------------------|
| 5 $\mu$ l         | Phusion Buffer (5x)       |
| 1.25 $\mu$ l      | Forward Primer            |
| 1.25 $\mu$ l      | Reverse Primer            |
| 1 $\mu$ l         | Plasmid DNA               |
| (9–11.25 $\mu$ l) | Water                     |
| (0–2.5 $\mu$ l)   | MgCl <sub>2</sub> (50 nM) |
| 5 $\mu$ l         | dNTP Mix (1.25 mM)        |
| 0.25 $\mu$ l      | Polymerase                |

---

Total: 25  $\mu$ l

Different annealing temperatures were tested to find the best condition for the different primer combination. For efficient DNA amplification, 22 PCR cycles with an elongation time of 6.30 min were applied.

The products of the PCR were checked on an Agarose-Gel. Afterwards the blunt ends of the primers were ligated through the use of the Quick Ligation Kit (New England BioLabs). Hereby to 10  $\mu$ l of the PCR product were 10  $\mu$ l of the 2  $\times$  Quick Ligation Buffer added and mixed. 1  $\mu$ l Quick T4 DNA Ligase were added and mixed. The mixture was incubated by RT for 15 min. Then 0.5  $\mu$ l of DpnI were added to the sample and incubated for 2 h. The enzyme cuts methylated DNA, therefore the parental DNA string will be cut. Afterwards 1  $\mu$ l of the mixture were transformed into TOP10 Cells (see 8.4). The transformation were checked via Colony-PCR.

### 4.3.3 Sequencing

Sequencing was done by Eurofins Genomics. Plasmids were sent to sequencing at a concentration of 100-200 ng /  $\mu$ l. Sequence analysis was done in Geneious (Version 7.1.9) through alignment with the original DNA sequence.

## 5.0 Synthesis of Pantetheine Substrates

Solvents were used without further purification or drying unless otherwise stated. Anhydrous Tetrahydrofuran (THF), diethyl ether (Et<sub>2</sub>O) and dichloromethane (DCM) and NADPH were purchased from Carl Roth. Other chemicals were obtained from Sigma Aldrich or TCI Deutschland GmbH. The syntheses were done using previously established protocols,<sup>1,12</sup> and where this was not the case it was recorded.

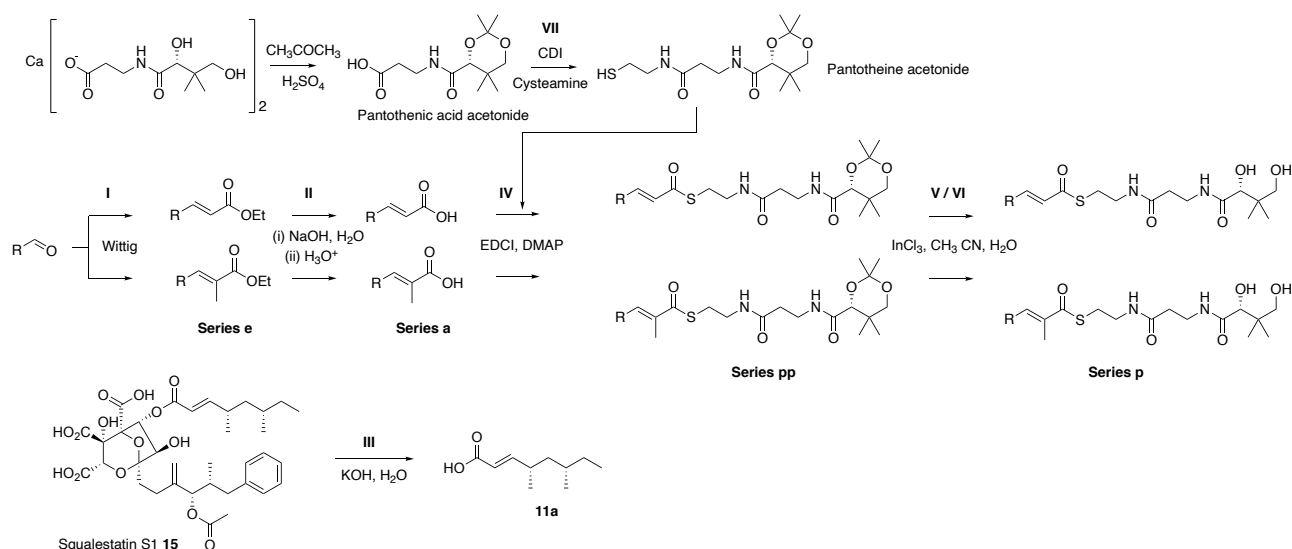

**Figure S5.0A.** Overall synthetic route to ER pantetheine substrates.

## 5.1 General Synthetic Methods

**I. Wittig Reaction.** A solution of dichloromethane (5 mL) and the respective aldehyde (1.00 mmol) was stirred at 0 °C. (Carbethoxyethylidene)triphenylphosphorane (0.72 g, 2.00 mmol) or Carbethoxymethylidene)triphenylphosphorane (0.69 g, 2.00 mmol) was added to this solution warmed to 25 °C and stirred for 16-18 h. Then the solvent was evaporated under a nitrogen flow. The crude product was purified by column chromatography.

**II. Ester Hydrolysis.** To a solution of the corresponding ester in ethanol/water 5:1 (5 mL/ 1 mL) potassium hydroxide (22 mmol) was added to the solution. After stirring under reflux for 3 hours diethyl ether was added. The mixture was washed with NaHCO<sub>3</sub> (3 × 10 mL). Then the aqueous layer was acidified with 2 M HCl until pH 1 and extracted with ethyl acetate (3 × 10 mL). The organic layer was dried over MgSO<sub>4</sub> and concentrated *in vacuo*.

**III. Squalestatin Hydrolysis.** To a solution of squalestatin S1 (1.00 g, 1.40 mmol) in ethanol/water 5:1 (5 mL/ 1 mL) potassium hydroxide (22.00 mmol) was added to the solution. After stirring under

reflux for 3 hours, diethyl ether was added to the solution and the mixture was washed with NaHCO<sub>3</sub> (3 × 10 mL). The aqueous layer with the (4*S*, 6*S*)-2-4-dimethyloct-2-enoic acid was acidified with 2 M HCl until pH 1 and extracted with ethyl acetate (3 × 10 mL). The organic layer was dried over MgSO<sub>4</sub> and concentrated *in vacuo*.

#### IV: Preparation of Acyl Pantetheine Acetonides<sup>12</sup>

Acid (1.00 mmol) and pantetheine acetonide (0.32 g, 1.00 mmol,) were dissolved in dichloromethane (8 ml). The mixture was cooled to 0 °C. Then *N,N*-dimethylaminopyridine (0.10 g, 0.80 mmol,) and *N*-(3-Diethylamino-propyl)-*N*-ethylcarbodiimide (0.38 g, 2.00 mmol) were added. The mixture was warmed to 25 °C and stirred for 4 hours. After that the mixture was quenched with 2M HCl (10 ml) and extracted with dichloromethane (3x 25 ml). The organic layer was washed with saturated NaHCO<sub>3</sub> (20 ml) and brine (20 ml). The product was dried over MgSO<sub>4</sub> and concentrated *in vacuo*. The crude product was purified by column chromatography

#### V. Synthesis of Pantetheine Substrates: Method 1<sup>12</sup>

The acyl pantetheine acetonide was stirred in a mixture of acetonitrile and water (1:1) and 10% TFA for 20 minutes. The reaction was followed by TLC and LCMS. The solvents were then lyophilized. The product was purified by preparative HPLC.

#### VI. Synthesis of Panthetine Substrates: Method 2

The corresponding Acyl pantetheine acetonide was dissolved in 8 ml acetonitrile. Indium chloride (2 eq.) and water (4 eq.) were added to the mixture. The reaction was stirred for 3 h at RT and completeness monitored by TLC and LCMS. The acetonitrile was evaporated and the product was purified by flash column chromatography (DCM / MeOH).

#### VII. Pantetheine Acetonide<sup>1,12,13</sup>

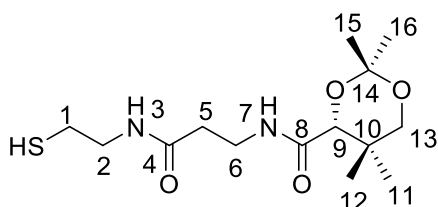

D-pantothenic acid hemicalcium salt (2.50 g, 10.50 mmol), *p*-toluensulfonic acid (2.30 g, 13.00 mmol) and 5 g molecular sieves were suspended in 125 mL dry acetone and stirred at 25 °C for 12 hours under a nitrogen atmosphere. The suspension was filtered with celite and washed with 200 ml acetone. The filtrate was concentrated to a colourless oil, redissolved in 200 ml ethyl acetate and washed two times with brine (25 ml) and dried over MgSO<sub>4</sub>. After that the ethyl acetate was removed

under vacuum and hexane was added to the flask to get a white solid that was dried under high vacuum. The corresponding D-pantothenic acetonide (1.90 g, 7.00 mmol) was dissolved in 40 mL dry THF with CDI (1.70 g, 11.00 mmol) and stirred for one hour at 25 °C. Then cysteamine (1.30 g, 11.00 mmol) was added to the solution and stirred for 12 hours. The solution was concentrated under vacuum and dichloromethane was added. The organic layer were washed with NH<sub>4</sub>Cl (25 mL) and brine (25 mL), dried over MgSO<sub>4</sub> and concentrated *in vacuo*. After that the colourless oil was purified by column chromatography. The obtained product was a white solid (1.82 g, 5.74 mmol, 85% over to steps). R<sub>f</sub>: 0.2 (EtOAc). **<sup>1</sup>H-NMR** (CDCl<sub>3</sub>, 400 MHz): δ [ppm]: 0.98 (s, 3H, 11-CH<sub>3</sub>); 1.05 (s, 3H, 12-CH<sub>3</sub>); 1.39 (t, 1H, SH); 1.43 (s, 3H, 15-CH<sub>3</sub>); 1.47 (s, 3H, 16-CH<sub>3</sub>); 2.40 (t, 2H, 5-CH<sub>2</sub>); 2.64-2.70 (m, 2H, 1-CH<sub>2</sub>); 3.29 (d, 1H, 13a-CH<sub>2</sub>); 3.37-3.63 (m, 4H, 2-6-CH<sub>2</sub>); 3.69 (d, 1H, 13b-CH<sub>2</sub>); 4.09 (s, 1H, 9-CH); 6.37 (bt, 1H, 3-NH); 7.03 (bt, 1H, 7-NH). **<sup>13</sup>C-NMR** (CDCl<sub>3</sub>, 100 MHz): δ [ppm]: 18.7 (12-CH<sub>3</sub>); 18.9 (11-CH<sub>2</sub>); 22.1 (15-CH<sub>3</sub>); 24.6 (1-CH<sub>2</sub>); 29.5 (15-CH<sub>3</sub>); 33.0 (10-C); 34.9 (6-CH<sub>2</sub>); 36.2 (5-CH<sub>2</sub>); 42.4 (2-CH<sub>2</sub>); 71.4 (13-CH<sub>2</sub>); 77.2 (9-CH); 99.1 (14-C); 170.3 (4-CO); 171.1 (8-CO). **ESMS**: *m/z*: 319 [M] H<sup>+</sup>, 261 [M - (CH<sub>3</sub>)<sub>2</sub>CO]H<sup>+</sup>

**(±) E-Ethyl-2,4-dimethylhex-2-enoate 18e<sup>14</sup>**

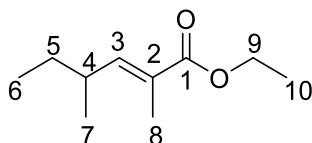

The obtained product was obtained from 2-methylbutanal as a colourless oil (0.29 g, 1.60 mmol, 85.3%). R<sub>f</sub>: 0.78 (EtOAc / PE 1: 10). **<sup>1</sup>H-NMR** (CDCl<sub>3</sub>, 400 MHz): δ 0.85 (t, 3H, 6-CH<sub>3</sub>); 1.00 (d, 3H, 7-CH<sub>3</sub>); 1.28-1.55 (m, 2H, 5-CH<sub>2</sub>); 1.30 (t, 3H, 10-CH<sub>3</sub>); 1.82 (s, 3H, 8-CH<sub>3</sub>); 2.41 (m, 1H, 4-CH); 4.19 (q, 2H, 9-CH<sub>2</sub>); 6.52 (d, 1H, 3-CH). **<sup>13</sup>C-NMR** (CDCl<sub>3</sub>, 100 MHz): δ 11.9 (6-CH<sub>3</sub>), 12.6 (7-CH<sub>3</sub>), 14.3 (10-CH<sub>3</sub>), 19.7 (8-CH<sub>3</sub>), 29.7 (5-CH<sub>2</sub>), 34.9 (4-CH), 60.4 (9-CH<sub>2</sub>), 126.6 (2-C), 147.9 (3-CH), 168.4 (1-CO). **ESMS**: *m/z*: 193 [M + Na]<sup>+</sup>, 171 [M]H<sup>+</sup>

**E-Ethyl 2-methylhex-2-enoate 20e<sup>14</sup>**

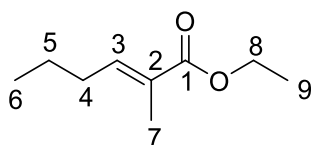

The obtained product was obtained from butanal as a colourless oil (0.18 g, 1.15 mmol, 57.6%), R<sub>f</sub> 0.21(EtOAc / PE 1: 10), **<sup>1</sup>H-NMR** (CDCl<sub>3</sub>, 400 MHz): δ 0.93 (t, 3H, 6-CH<sub>3</sub>); 1.29 (t, 3H, 9-CH<sub>3</sub>); 1.39-1.55 (m, 2H, 5-CH<sub>2</sub>); 1.82 (s, 3H, 7-CH<sub>3</sub>); 2.18 (q, 2H, 4-CH<sub>2</sub>); 4.18 (q, 2H, 8-CH<sub>2</sub>); 6.74 (t, 1H, 3-CH). **<sup>13</sup>C-NMR** (CDCl<sub>3</sub>, 100 MHz): δ 12.4 (6-CH<sub>3</sub>), 13.9 (9-CH<sub>3</sub>), 14.3 (7-CH<sub>3</sub>), 21.9 (5-CH<sub>2</sub>); 30.7

(4-CH<sub>2</sub>); 60.4 (8-CH<sub>2</sub>); 127.9 (2-C); 142.2 (3-CH); 168.4 (1-CO). **ESMS:** *m/z*: 179 [M + Na]<sup>+</sup>, 157 [M]H<sup>+</sup>, 129 [M - CH<sub>2</sub>CH<sub>3</sub>]H<sup>+</sup>.

### ***E*-Ethyl-2-methyloct-2-enoate 23e<sup>14</sup>**

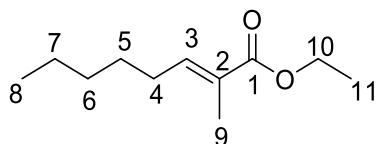

The obtained product was obtained from hexanal as a colourless oil (0.23 g, 1.25 mmol, 59.5%). *R<sub>f</sub>*: 0.65 (EtOAc / PE 1: 10). **<sup>1</sup>H-NMR** (CDCl<sub>3</sub>, 400 MHz): δ 0.88 (t, 3H, 8-CH<sub>3</sub>); 1.25-1.55 (m, 9H, 5-7-CH<sub>2</sub>, 11-CH<sub>3</sub>); 1.82 (s, 3H, 9-CH<sub>3</sub>); 2.15 (q, 2H, 4-CH<sub>2</sub>); 4.18 (q, 2H, 10-CH<sub>2</sub>); 6.77 (t, 1H, 3-CH). **<sup>13</sup>C-NMR** (CDCl<sub>3</sub>, 100 MHz): δ 12.3 (8-CH<sub>3</sub>), 14.0 (9-CH<sub>3</sub>), 14.3 (11-CH<sub>3</sub>), 22.5 (7-CH<sub>2</sub>), 28.3 (5-CH<sub>2</sub>), 28.7 (4-CH<sub>2</sub>), 31.6 (6-CH<sub>2</sub>), 60.4 (10-CH<sub>2</sub>), 127.7 (2-C), 142.5 (3-CH), 168.4 (1-C). **ESMS:** *m/z*: 207 [M + Na]<sup>+</sup>, 185 [M]H<sup>+</sup>.

### ***E*-Ethyl-2-methyldec-2-enoate 25e<sup>14</sup>**

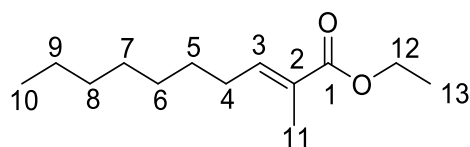

The obtained product was obtained from octanal as a colourless oil (0.27 g, 1.27 mmol, 63%). *R<sub>f</sub>*: 0.85 (EtOAc / PE 1:7). **<sup>1</sup>H-NMR** (CDCl<sub>3</sub>, 400 MHz): δ 0.88 (t, 3H, 10-CH<sub>3</sub>); 1.25-1.58 (m, 13H, 5-9-CH<sub>2</sub>, 13-CH<sub>3</sub>); 1.82 (s, 3H, 11-CH<sub>3</sub>); 2.15 (q, 2H, 4-CH<sub>2</sub>); 4.18 (q, 2H, 12-CH<sub>2</sub>); 6.75 (t, 1H, 3-CH). **<sup>13</sup>C-NMR** (CDCl<sub>3</sub>, 100 MHz): δ 12.3 (10-CH<sub>3</sub>), 14.1 (11-CH<sub>3</sub>), 14.3 (13-CH<sub>3</sub>), 22.6 (9-CH<sub>2</sub>), 28.6 (7-CH<sub>2</sub>), 28.7 (6-CH<sub>2</sub>), 29.1 (5-CH<sub>2</sub>), 29.4 (4-CH<sub>2</sub>), 31.8 (8-CH<sub>2</sub>), 60.4 (12-CH<sub>2</sub>), 127.6 (2-C), 142.5 (3-CH), 168.4 (1-CO). **ESMS:** *m/z*: 254 [M + CH<sub>3</sub>CN]H<sup>+</sup>, 213 [M]H<sup>+</sup>.

### ***E*-Ethyl-2-methyltetradec-2-enoate 26e<sup>15</sup>**

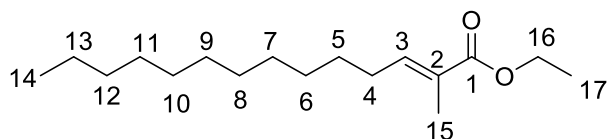

The obtained product was obtained from dodecanal as a colourless oil (0.34 g, 1.27 mmol, 63.4%). *R<sub>f</sub>*: 0.9 (EtOAc / PE 1:7). **<sup>1</sup>H-NMR** (CDCl<sub>3</sub>, 400 MHz): δ 0.88 (t, 3H, 14-CH<sub>3</sub>), 1.24-1.36 (m, 18H, 5-13-CH<sub>2</sub>), 1.43 (t, 3H, 17-CH<sub>3</sub>), 2.16 (q, 2H, 4-CH<sub>2</sub>), 6,76 (d, 1H, 3-CH), 1.82 (s, 3H, 15-CH<sub>3</sub>), 4.19 (q, 2H, 16-CH<sub>2</sub>). **<sup>13</sup>C-NMR** (CDCl<sub>3</sub>, 100 MHz): δ 13.2 (15-CH<sub>3</sub>), 14.0 (14-CH<sub>3</sub>), 14.0 (17-CH<sub>3</sub>), 22.5 (13-CH<sub>2</sub>), 28.1-31.8 (4-12-CH<sub>2</sub>), 61.1 (16-CH<sub>2</sub>), 142.8 (2-C), 126.5 (3-CH), 168.1 (1-CO). **ESMS:** *m/z*: 291 [M+Na]H<sup>+</sup>



### ***E*-(4*S*,6*S*)-2-4-Dimethyloctenoic acid 11a<sup>1,12</sup>**

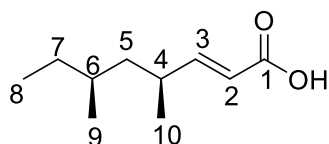

The obtained product was obtained by hydrolysis of squalestatin S1 **15** as a yellow solid (0.22 g, 1.29 mmol, 84%), <sup>1</sup>H-NMR (CDCl<sub>3</sub>, 400 MHz): δ 0.88 (t, *J* = 7.4, 6H, 8-9-CH<sub>3</sub>); 1.07 (d, *J* = 6.2, 3H, 10-CH<sub>3</sub>); 1.27-1.46 (m, 5H, 7-5-CH<sub>2</sub>-6-CH); 2.41-2.52 (m, 1H, 4-CH), 5.81 (d, *J* = 1.7, *J* = 16.0, 1H, 2-CH), 6.96 (dd, *J* = 8.8, *J* = 16.0, 1H, 3-CH). <sup>13</sup>C-NMR (CDCl<sub>3</sub>, 100 MHz): δ 11.1 (8-CH<sub>3</sub>); 20.2 (9-CH<sub>3</sub>); 20.7 (10-CH<sub>3</sub>); 29.8 (7-CH<sub>2</sub>); 31.9 (6-CH); 34.4 (4-CH); 43.1 (5-CH<sub>2</sub>), 118.3 (2-CH); 164.6 (3-CH); 176.7 (1-CO). ESMS: *m/z*: 193 [M + Na]<sup>+</sup>, 171 [M]H<sup>+</sup>

### **(±) *E*-2,4-Dimethylhex-2-enoic acid 18a<sup>1,12</sup>**

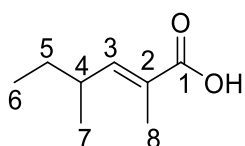

The product was obtained from **18e** as a red oil (0.17 g, 1.19 mmol, 70.8%), <sup>1</sup>H-NMR (CDCl<sub>3</sub>, 400 MHz): δ 0.86 (t, 3H, 1-CH<sub>3</sub>); 1.01 (d, 3H, 4-CH<sub>3</sub>); 1.24-1.49 (m, 2H, 2-CH<sub>2</sub>); 1.85 (s, 3H, 7-CH<sub>3</sub>); 2.38-2.49 (m, 1H, 3-CH); 6.68 (qq, 1H, 5-CH). <sup>13</sup>C-NMR (CDCl<sub>3</sub>, 100 MHz): δ 11.8 (1-CH<sub>3</sub>), 12.2 (7-CH<sub>3</sub>), 19.5 (4-CH<sub>3</sub>), 29.5 (2-CH<sub>2</sub>), 35.1 (3-CH), 125.7 (6-C), 150.8 (5-CH), 173.3 (8-COOH). ESMS: *m/z*: 184 [M + CH<sub>3</sub>CN]H<sup>+</sup>, 143 [M]H<sup>+</sup>

### ***E*-2-Methylhex-2-enoic acid 20a<sup>1,12</sup>**

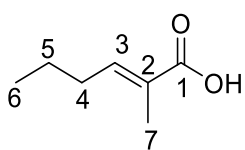

The obtained product was obtained from **20e** as a red oil (0.11 g, 0.85 mmol, 74.7%). <sup>1</sup>H-NMR (CDCl<sub>3</sub>, 400 MHz): δ 0.91 (t, 3H, 6-CH<sub>3</sub>); 1.32-1.50 (m, 2H, 5-CH<sub>2</sub>); 1.85 (s, 3H, 7-CH<sub>3</sub>); 2.22 (q, 2H, 4-CH<sub>2</sub>); 6.93 (t, 1H, 3-CH). <sup>13</sup>C-NMR (CDCl<sub>3</sub>, 100 MHz): δ 12.0 (6-CH<sub>3</sub>), 13.8 (7-CH<sub>3</sub>), 21.7 (5-CH<sub>2</sub>), 30.6 (4-CH<sub>2</sub>), 127.0 (2-C), 145.2 (3-CH), 173.1 (1-CO). ESMS: *m/z*: 152 [M + Na]<sup>+</sup>, 129 [M]H<sup>+</sup>; 111 [M - H<sub>2</sub>O] H<sup>+</sup>.

**(±) *E*-4-Methylhexenoic acid 21a**<sup>1,12</sup>

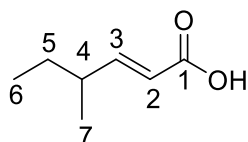

The product was obtained from **21e** as a yellow oil (1.43 g, 11.17 mmol, 47%). **<sup>1</sup>H-NMR** (CDCl<sub>3</sub>, 400 MHz): δ 0.88 (t, 3H, 6-CH<sub>3</sub>); 1.04 (d, 3H, 7-CH<sub>3</sub>); 1.36-1.44 (m, 2H, 5-CH<sub>2</sub>); 2.17-2.27 (m, 1H, 4-CH); 5.78 (d, 1H, 2-CH); 6.87 (t, 1H, 3-CH). **<sup>13</sup>C-NMR** (CDCl<sub>3</sub>, 100 MHz): δ 11.7 (6-CH<sub>3</sub>), 18.9 (7-CH<sub>3</sub>), 28.7 (5-CH<sub>2</sub>), 38.1 (4-CH), 119.3 (2-CH), 154.8 (3-CH), 167.3 (1-CO). **ESMS**: *m/z*: 152 [M + Na]<sup>+</sup>, 129 [M]H<sup>+</sup>

***E*-oct-2-enoic acid 22a**<sup>1,12</sup>

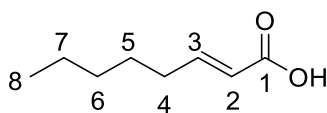

The product was obtained from *E*-ethyloct-2-enoate as a yellow oil (1.69 g, 11.9, 49.5%). **<sup>1</sup>H-NMR** (CDCl<sub>3</sub>, 400 MHz): δ 0.92 (t, 3H, 8-CH<sub>3</sub>); 1.26-1.52 (m, 6H, 5-6-7-CH<sub>2</sub>); 2.22 (q, 2H, 4-CH<sub>2</sub>); 5.78 (dd, 1H, 2-CH); 6.94 (tq, 1H, 3-CH). **<sup>13</sup>C-NMR** (CDCl<sub>3</sub>, 100 MHz): δ 12.0 (8-CH<sub>3</sub>), 22.5 (7-CH<sub>2</sub>), 28.1 (5-CH<sub>2</sub>), 28.8 (4-CH<sub>2</sub>), 31.5 (6-CH<sub>2</sub>), 126.8 (2-C), 145.5 (3-CH), 173.1 (1-CO). **ESMS**: *m/z*: 143 [M-H]<sup>-</sup>

***E*-2-Methyloct-2-enoic acid 23a**<sup>1,12</sup>

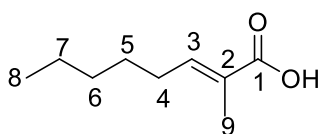

The product was obtained from **23e** as a red oil (0.11 g, 0.7 mmol, 56.4%). **<sup>1</sup>H-NMR** (CDCl<sub>3</sub>, 400 MHz): δ 0.92 (t, 3H, 8-CH<sub>3</sub>); 1.26-1.52 (m, 6H, 5-6-7-CH<sub>2</sub>); 1.86 (s, 3H, 9-CH<sub>3</sub>); 2.22 (q, 2H, 4-CH<sub>2</sub>); 6.94 (t, 1H, 3-CH). **<sup>13</sup>C-NMR** (CDCl<sub>3</sub>, 100 MHz): δ 12.0 (8-CH<sub>3</sub>), 14.0 (9-CH<sub>3</sub>), 22.5 (7-CH<sub>2</sub>), 28.1 (5-CH<sub>2</sub>), 28.8 (4-CH<sub>2</sub>), 31.5 (6-CH<sub>2</sub>), 126.8 (2-C), 145.5 (3-CH), 173.1 (1-CO). **ESMS**: *m/z*: 179 [M + Na]<sup>+</sup>, 157 [M]H<sup>+</sup>

***E*-Dec-2-enoic acid 24a**<sup>1,12</sup>

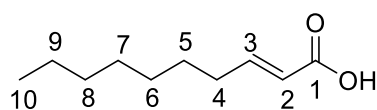

The product was obtained from *E*-ethyl-dec-2-enoate as a yellow oil (0.17 g, 1 mmol, 62.9%), **<sup>1</sup>H-NMR** (CDCl<sub>3</sub>, 400 MHz): δ 0.90 (t, 3H, 10-CH<sub>3</sub>); 1.29-1.50 (m, 10H, 5-9-CH<sub>2</sub>); 2.25 (dq, 2H, 4-

CH<sub>2</sub>); 5.84 (d, 1H, 2-CH); 7.10 (dt, 1H, 3-CH). <sup>13</sup>C-NMR (CDCl<sub>3</sub>, 100 MHz): δ 14.1 (10-CH<sub>3</sub>), 22.6 (9-CH<sub>2</sub>); 27.8 (8-CH<sub>2</sub>); 29.0 (7-CH<sub>2</sub>); 29.1 (6-CH<sub>2</sub>); 31.7 (5-CH<sub>2</sub>); 32.3 (4-CH<sub>2</sub>); 120.5 (2-CH); 152.5 (3-CH); 171.9 (1-CO). **ESMS**: *m/z*: 212.4 [M]H<sup>+</sup>, 193.2 [M - Na]H<sup>+</sup>, 153.5 [M - H<sub>2</sub>O]H<sup>+</sup>

### ***E*-2-Methyldec-2-enoic acid 25a**<sup>1,12</sup>

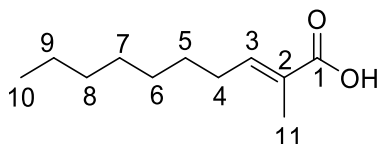

The product was obtained from **25e** as a red oil (0.17 g, 0.92 mmol, 62.9%). <sup>1</sup>H-NMR (CDCl<sub>3</sub>, 400 MHz): δ 0.87-0.90 (m, 3H, 10-CH<sub>3</sub>); 1.26-1.30 (m, 10H, 5-9-CH<sub>2</sub>); 1.83 (s, 3H, 11-CH<sub>3</sub>); 2.19 (q, 2H, 4-CH<sub>2</sub>); 6.90 (t, 1H, 3-CH). <sup>13</sup>C-NMR (CDCl<sub>3</sub>, 100 MHz): δ 12.3 (10-CH<sub>3</sub>), 14.1 (11-CH<sub>3</sub>), 22.6 (9-CH<sub>2</sub>), 28.4 (7-CH<sub>2</sub>), 28.9 (6-CH<sub>2</sub>), 29.1 (5-CH<sub>2</sub>), 29.3 (4-CH<sub>2</sub>), 31.8 (8-CH<sub>2</sub>), 126.8 (2-C), 145.6 (3-CH), 172.8 (1-CO). **ESMS**: *m/z*: 226 [M + CH<sub>3</sub>CN]H<sup>+</sup>, 167 [M - H<sub>2</sub>O]H<sup>+</sup>.

### ***E*-2-Methyltetradec-2-enoic acid 26a**<sup>15</sup>

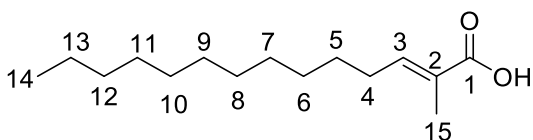

The product was obtained from **26e** as a red oil (0.29 g, 1.2 mmol, 85.3%). <sup>1</sup>H-NMR (CDCl<sub>3</sub>, 400 MHz): δ 0.88 (t, 3H, 14-CH<sub>3</sub>), 1.24-1.36 (m, 18H, 5-13-CH<sub>2</sub>), 2.16 (q, 2H, 4-CH<sub>2</sub>), 6.76 (d, 1H, 3-CH), 1.82 (s, 3H, 15-CH<sub>3</sub>). <sup>13</sup>C-NMR (CDCl<sub>3</sub>, 100 MHz): δ 13.2 (15-CH<sub>3</sub>), 14.0 (14-CH<sub>3</sub>), 22.5 (13-CH<sub>2</sub>), 28.1-31.8 (4-12-CH<sub>2</sub>), 142.8 (2-C), 126.5 (3-CH), 168.1 (1-CO). **ESMS**: *m/z*: 263 [M + Na]<sup>+</sup>, 223 [M - H<sub>2</sub>O]H<sup>+</sup>

### ***E*-4*S*-6*S*-Dimethyl-octenoyl-pantethine acetonide 11pp**<sup>1,12,16</sup>

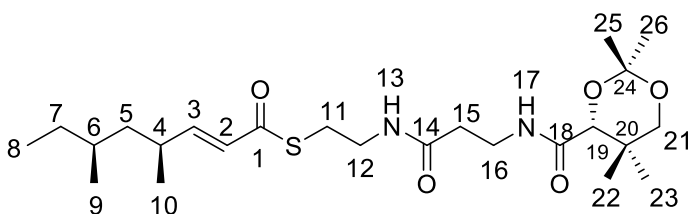

The product was obtained from **11a** as a colorless oil (0.22 g, 0.47 mmol, 36.2%). R<sub>f</sub>: 0.47 (EtOAc / PE, 9:1) <sup>1</sup>H-NMR (CDCl<sub>3</sub>, 400 MHz): δ 0.87 (m, 6H, 8-9-CH<sub>3</sub>); 0.97 (s, 3H, 22-CH<sub>3</sub>); 1.04 (s, 3H, 23-CH<sub>3</sub>); 1.13-1.19 (m, 2H, 7-CH<sub>3</sub>), 1.26-1.49 (m, 3H, 5-6-CH<sub>2</sub>); 1.44 (s, 3H, 25-CH<sub>3</sub>); 1.48 (s, 3H, 26-CH<sub>3</sub>); 2.34 (m, 1H, 4-CH); 2.45 (t, *J* = 5.9, 1H, 14-CH); 3.10 (t, *J* = 6.5, 2H, 11-CH<sub>2</sub>); 3.27 (d, *J* = 11.7, 1H, 21a-CHH); 3.42-3.62 (m, 4H, 12-16-CH<sub>2</sub>); 3.70 (d, *J* = 11.6, 1H, 21b-CHH); 4.09 (s, 1H,

19-CH); 6.12 (dd,  $J = 1.0, 16.0$ , 1H, 2-CH); 6.28 (bt,  $J = 6.3$ , 1H, 13-NH); 6.80 (d,  $J = 8.2, 15.8$ , 1H, 3-CH); 7.06 (bt,  $J = 5.8$ , 1H, 17-NH).  $^{13}\text{C-NMR}$  ( $\text{CDCl}_3$ , 100 MHz):  $\delta$  11.1 (8-CH<sub>3</sub>); 14.2 (9-CH<sub>3</sub>); 18.7 (22-CH<sub>3</sub>); 18.9 (23-CH<sub>3</sub>); 22.1 (25-CH<sub>3</sub>); 28.2 (11-CH<sub>2</sub>); 29.5 (26-CH<sub>3</sub>); 29.7 (7-CH<sub>2</sub>); 32.9 (6-CH); 32.9 (18-C); 34.4 (4-CH); 34.7 (15-CH<sub>2</sub>); 35.9 (16-CH<sub>2</sub>); 39.7 (12-CH<sub>2</sub>); 43-5 (5-CH) 71.5 (21-CH<sub>2</sub>); 77.2 (19-CH); 99.1 (24-C); 126.6 (2-CH); 152.1 (3-CH); 170.1 (14-CO); 171.1 (18-CO); 190.1 (1-CO). **ESMS**:  $m/z$ : 471  $[\text{M}]^+$ , 493  $[\text{M} + \text{Na}]^+$

#### 4-*RS-E-2-4*-Dimethylhex-2-enoyl pantetheine acetonide **18pp**<sup>1,12,16</sup>

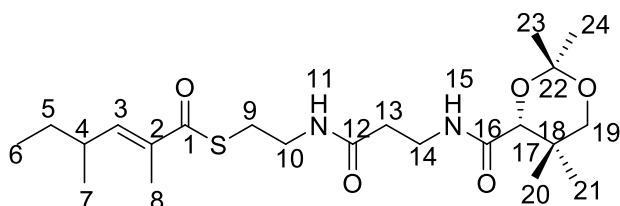

The product was obtained from **18a** as a colourless oil (0.38 g, 0.89 mmol, 89%).  $R_f$ : 0.45 (EtOAc).  $^1\text{H-NMR}$  ( $\text{CDCl}_3$ , 400 MHz):  $\delta$  0.87 (t,  $J = 7.9$ , 3H, 6-CH<sub>3</sub>); 0.97 (s, 3H, 20-CH<sub>3</sub>); 1.04 (s, 3H, 21-CH<sub>3</sub>); 1.03 (d,  $J = 7.5$ , 3H, 7-CH<sub>3</sub>), 1.24-1.49 (m, 3H, 4-CH, 5-CH<sub>2</sub>); 1.41 (s, 3H, 23-CH<sub>3</sub>); 1.46 (s, 3H, 24-CH<sub>3</sub>); 1.88 (s, 3H, 8-CH<sub>3</sub>); 2.42 (t,  $J = 5.9$ , 2H, 13-CH<sub>2</sub>); 3.05 (t,  $J = 6.4$ , 2H, 9-CH<sub>2</sub>); 3.27 (d,  $J = 11.4$ , 1H, 19a-CHH); 3.39-3.64 (m, 4H, 10-14-CH<sub>2</sub>); 3.68 (d,  $J = 11.7$ , 1H, 19b-CHH); 4.07 (s, 1H, 17-CH); 6.09 (bt,  $J = 5.4$ , 1H, 11-NH); 6.53 (dd,  $J = 1.4, 9.8$ , 1H, 3-CH); 7.03 (bt,  $J = 5.8$ , 1H, 15-NH).  $^{13}\text{C-NMR}$  ( $\text{CDCl}_3$ , 100 MHz):  $\delta$  11.9 (6-CH<sub>3</sub>); 12.2 (7-CH<sub>3</sub>); 18.7 (20-CH<sub>3</sub>); 18.9 (21-CH<sub>3</sub>); 19.9 (8-CH<sub>3</sub>); 22.1 (23-CH<sub>3</sub>); 28.5 (9-CH<sub>2</sub>); 29.5 (24-CH<sub>3</sub>); 29.6 (5-CH<sub>2</sub>); 32.9 (18-C); 34.4 (13-CH<sub>2</sub>); 35.0 (4-CH); 35.9 (14-CH<sub>2</sub>); 39.7 (10-CH<sub>2</sub>); 71.5 (19-CH<sub>2</sub>); 77.2 (17-CH); 99.1 (22-C); 134.5 (2-C); 147.6 (3-CH); 170.0 (12-CO); 171.2 (16-CO); 193.9 (1-CO). **ESMS**:  $m/z$ : 471  $[\text{M}]^+$ , 493  $[\text{M} + \text{Na}]^+$

#### Tigloyl pantetheine acetonide **19pp**<sup>1,12,13</sup>

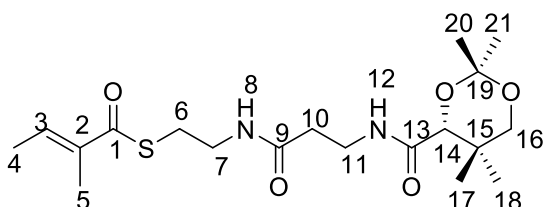

The product was obtained from tiglic acid as a colourless oil (0.318 g, 0.795 mmol, 79.5%)  $R_f$ : 0.46 (EtOAc).  $^1\text{H-NMR}$  ( $\text{CDCl}_3$ , 400 MHz):  $\delta$  0.99 (s, 3H, 17-CH<sub>3</sub>); 1.04 (s, 3H, 18-CH<sub>3</sub>); 1.44 (s, 3H, 21-CH<sub>3</sub>); 1.48 (s, 3H, 22-CH<sub>3</sub>); 1.85-1.87 (m, 6H, 4-5-CH<sub>3</sub>); 2.44 (t,  $J = 6.5$ , 2H, 10-CH<sub>2</sub>); 3.08 (t,  $J = 6.3$ , 2H, 6-CH<sub>2</sub>); 3.28 (d,  $J = 11.7$ , 1H, 16a-CHH); 3.41-3.62 (m, 4H, 7-11-CH<sub>2</sub>); 3.68 (d,  $J = 11.6$ , 1H, 16b-CHH); 4.08 (s, 1H, 14-CH); 6.13 (bt,  $J = 5.8$ , 1H, 8-NH); 6.93 (q,  $J = 1.4, 6.8$ , 1H, 3-CH);

7.03 (bt,  $J = 5.9$ , 1H, 12-NH).  $^{13}\text{C-NMR}$  ( $\text{CDCl}_3$ , 100 MHz):  $\delta$ 12.2 (4- $\text{CH}_3$ ); 14.4 (5- $\text{CH}_3$ ); 18.7 (17- $\text{CH}_3$ ); 18.9 (18- $\text{CH}_3$ ); 22.1 (21- $\text{CH}_3$ ); 28.3 (6- $\text{CH}_2$ ); 29.5 (22- $\text{CH}_3$ ); 32.9 (15-C); 34.8 (10- $\text{CH}_2$ ); 35.9 (11- $\text{CH}_2$ ); 39.7 (7- $\text{CH}_2$ ); 71.5 (16- $\text{CH}_2$ ); 77.2 (14-CH); 99.1 (19-C); 136.8 (2-C); 136.9 (3-CH); 170.1 (9-CO); 171.1 (13-CO); 190.2 (1-CO). **ESMS**:  $m/z$ : 423.3  $[\text{M} + \text{Na}]^+$ , 401  $[\text{M}]\text{H}^+$

### ***E*-2-Methylhex-2-enoyl pantetheine acetonide 20pp**<sup>1,12,16</sup>

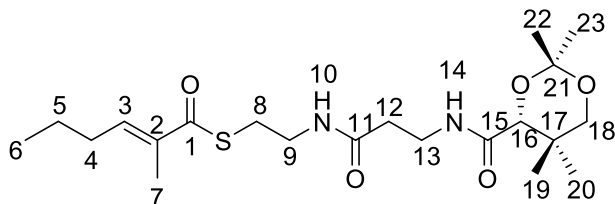

The product was obtained from **20a** as a yellow oil (0.38 g, 0.88 mmol, 88%).  $R_f$ : 0.45 (EtOAc).  $^1\text{H-NMR}$  ( $\text{CDCl}_3$ , 400 MHz):  $\delta$  0.96 (t,  $J = 7.6$ , 3H, 6- $\text{CH}_3$ ); 0.97 (s, 3H, 19- $\text{CH}_3$ ); 1.04 (s, 3H, 20- $\text{CH}_3$ ); 1.44-1.55 (m, 2H, 5- $\text{CH}_2$ ); 1.41 (s, 3H, 22- $\text{CH}_3$ ); 1.46 (s, 3H, 23- $\text{CH}_3$ ); 1.87 (s, 3H, 7- $\text{CH}_3$ ); 2.20 (q,  $J = 7.4$ , 2H, 4- $\text{CH}_2$ ); 2.42 (t,  $J = 6.1$ , 2H, 12- $\text{CH}_2$ ); 3.05 (t,  $J = 6.5$ , 2H, 8- $\text{CH}_2$ ); 3.27 (d,  $J = 11.2$ , 1H, 18a- $\text{CHH}$ ); 3.39-3.62 (m, 4H, 9-13- $\text{CH}_2$ ); 3.68 (d,  $J = 11.7$ , 1H, 18b- $\text{CHH}$ ); 4.07 (s, 1H, 16-CH); 6.10 (bt,  $J = 5.7$ , 1H, 10-NH); 6.77 (t,  $J = 1.3$ , 6.9, 1H, 3-CH); 7.03 (bt,  $J = 5.7$ , 1H, 14-NH).  $^{13}\text{C-NMR}$  ( $\text{CDCl}_3$ , 100 MHz):  $\delta$ 12.5 (6- $\text{CH}_3$ ); 13.9 (7- $\text{CH}_3$ ); 18.7 (19- $\text{CH}_3$ ); 18.9 (20- $\text{CH}_3$ ); 21.8 (5- $\text{CH}_2$ ); 22.1 (22- $\text{CH}_3$ ); 28.4 (8- $\text{CH}_2$ ); 28.8 (4- $\text{CH}_2$ ); 29.5 (23- $\text{CH}_3$ ); 32.9 (17-C); 34.8 (12- $\text{CH}_2$ ); 35.9 (13- $\text{CH}_2$ ); 39.7 (9- $\text{CH}_2$ ); 71.5 (18- $\text{CH}_2$ ); 77.2 (16-CH); 99.1 (21-C); 135.9 (2-C); 142.1 (3-CH); 170.0 (11-CO); 171.2 (15-CO); 193.7 (1-CO). **ES-MS**:  $m/z$ : 429.7  $[\text{M}]\text{H}^+$

### ***3-RS-E*-4-Methylhex-2-enoyl pantetheine acetonide 21pp**<sup>1,12,16</sup>

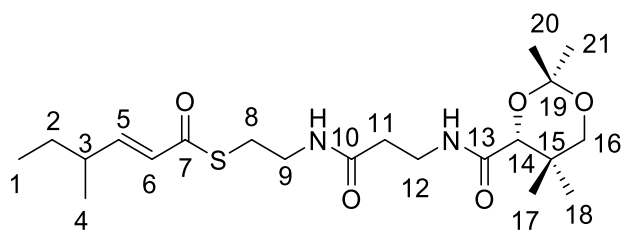

The product was obtained from **21a** as a colourless oil (0.35 g, 0.82 mmol, 82%).  $R_f$ : 0.47 (EtOAc).  $^1\text{H-NMR}$  ( $\text{CDCl}_3$ , 400 MHz):  $\delta$  0.88 (t,  $J = 7.2$ , 3H, 6- $\text{CH}_3$ ); 0.97 (s, 3H, 19- $\text{CH}_3$ ); 1.04 (s, 3H, 20- $\text{CH}_3$ ); 1.06 (d,  $J = 6.7$ , 3H, 7- $\text{CH}_3$ ), 1.40-1.45 (m, 2H, 5- $\text{CH}_2$ ); 1.41 (s, 3H, 22- $\text{CH}_3$ ); 1.46 (s, 3H, 23- $\text{CH}_3$ ); 2.17-2.26 (m, 1H, 4-CH); 2.42 (t,  $J = 6.3$ , 2H, 12- $\text{CH}_2$ ); 3.05 (t,  $J = 6.3$ , 2H, 8- $\text{CH}_2$ ); 3.27 (d,  $J = 11.9$ , 1H, 18a- $\text{CHH}$ ); 3.40-3.62 (m, 4H, 9-13- $\text{CH}_2$ ); 3.68 (d,  $J = 11.7$ , 1H, 18b- $\text{CHH}$ ); 4.07 (s, 1H, 16-CH); 6.08 (dd,  $J = 1.2$ , 15.6, 1H, 2-CH); 6.12 (bt,  $J = 5.1$ , 1H, 10-NH); 6.77 (dd,  $J = 7.5$ , 15.5, 1H, 3-CH); 7.03 (bt,  $J = 6.0$ , 1H, 14-NH).  $^{13}\text{C-NMR}$  ( $\text{CDCl}_3$ , 100 MHz):  $\delta$ 11.6 (6- $\text{CH}_3$ ); 12.2 (7- $\text{CH}_3$ ); 18.7 (19- $\text{CH}_3$ ); 18.9 (20- $\text{CH}_3$ ); 22.1 (22- $\text{CH}_3$ ); 28.3 (5- $\text{CH}_2$ ); 28.4 (8- $\text{CH}_2$ ); 29.5 (23- $\text{CH}_3$ ); 32.9

(17-C); 34.8 (12-CH<sub>2</sub>); 35.9 (13-CH<sub>2</sub>); 38.1 (4-CH); 39.7 (9-CH<sub>2</sub>); 71.5 (18-CH<sub>2</sub>); 77.2 (16-CH); 99.1 (21-C); 126.7 (2-CH); 151.7 (3-CH); 170.0 (11-CO); 171.2 (15-CO); 190.3 (1-CO) **ESMS**: *m/z* (%): 429.7 [M]H<sup>+</sup>, 452 [M + Na]<sup>+</sup>

### ***E*-Oct-2-enoic pantetheine acetonide **22pp**<sup>1,12,16</sup>**

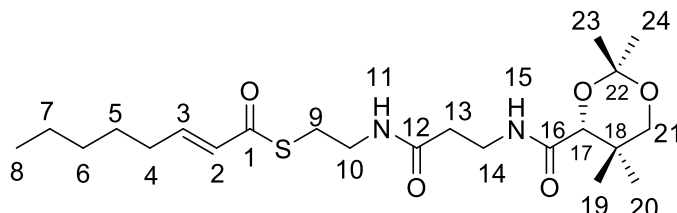

The product was obtained from **22a** as a colorless oil (0.35 g, 0.79 mmol, 56.1%), *R<sub>f</sub>*: 0.56 (EtOAc / PE, 9:1). **<sup>1</sup>H-NMR** (CDCl<sub>3</sub>, 400 MHz): δ 0.90 (t, *J* = 7.4, 3H, 8-CH<sub>3</sub>); 0.97 (s, 3H, 19-CH<sub>3</sub>); 1.04 (s, 3H, 20-CH<sub>3</sub>); 1.31-1.51 (m, 6H, 5-6-7-CH<sub>2</sub>); 1.41 (s, 3H, 23-CH<sub>3</sub>); 1.46 (s, 3H, 24-CH<sub>3</sub>); 2.21 (g, *J* = 7.3, 2H, 4-CH<sub>2</sub>); 2.42 (t, *J* = 5.8, 2H, 13-CH<sub>2</sub>); 3.05 (t, *J* = 6.7, 2H, 9-CH<sub>2</sub>); 3.27 (d, *J* = 11.8, 1H, 21a-CHH); 3.39-3.62 (m, 4H, 10-14-CH<sub>2</sub>); 3.68 (d, *J* = 12.2, 1H, 21b-CHH); 4.07 (s, 1H, 17-CH); 6.08 (bt, *J* = 5.8, 1H, 11-NH); 6.92 (t, *J* = 1.5, 7.4, 1H, 3-CH); 7.03 (bt, *J* = 5.8, 1H, 15-NH). **<sup>13</sup>C-NMR** (CDCl<sub>3</sub>, 100 MHz): δ 12.5 (8-CH<sub>3</sub>); 18.7 (19-CH<sub>3</sub>); 18.9 (20-CH<sub>3</sub>); 22.1 (24-CH<sub>3</sub>); 22.5 (7-CH<sub>2</sub>); 28.2 (10-CH<sub>2</sub>); 28.4 (5-CH<sub>2</sub>); 28.8 (4-CH<sub>2</sub>); 29.5 (23-CH<sub>3</sub>); 31.6 (6-CH<sub>2</sub>); 32.9 (18-C); 34.8 (13-CH<sub>2</sub>); 35.9 (14-CH<sub>2</sub>); 39.7 (9-CH<sub>2</sub>); 71.5 (21-CH<sub>2</sub>); 77.2 (17-CH); 99.1 (22-C); 135.7 (2-C); 142.4 (3-CH); 170.0 (12-CO); 171.1 (16-CO); 193.7 (1-CO). **ESMS**: *m/z*: 443.62 [M]H<sup>+</sup>

### ***E*-2-Methyloct-2-enoyl pantetheine acetonide **23pp**<sup>1,12,16</sup>**

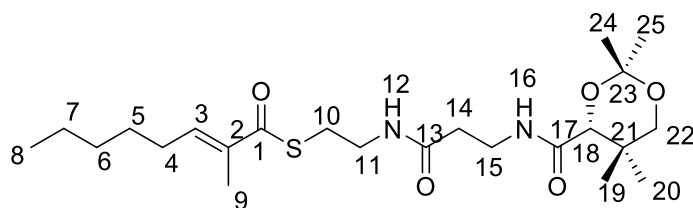

The product was obtained from **23a** as a colourless oil (0.27 g, 0.60 mmol, 60%). *R<sub>f</sub>*: 0.47 (EtOAc). **<sup>1</sup>H-NMR** (CDCl<sub>3</sub>, 400 MHz): δ 0.90 (t, *J* = 7.4, 3H, 8-CH<sub>3</sub>); 0.97 (s, 3H, 19-CH<sub>3</sub>); 1.04 (s, 3H, 20-CH<sub>3</sub>); 1.31-1.51 (m, 6H, 5-6-7-CH<sub>2</sub>); 1.41 (s, 3H, 24-CH<sub>3</sub>); 1.46 (s, 3H, 25-CH<sub>3</sub>); 1.87 (s, 3H, 9-CH<sub>3</sub>); 2.21 (g, *J* = 7.3, 2H, 4-CH<sub>2</sub>); 2.42 (t, *J* = 5.8, 2H, 14-CH<sub>2</sub>); 3.05 (t, *J* = 6.7, 2H, 10-CH<sub>2</sub>); 3.27 (d, *J* = 11.8, 1H, 22a-CHH); 3.39-3.62 (m, 4H, 11-15-CH<sub>2</sub>); 3.68 (d, *J* = 12.2, 1H, 22b-CHH); 4.07 (s, 1H, 18-CH); 6.08 (bt, *J* = 5.8, 1H, 12-NH); 6.92 (t, *J* = 1.5, 7.4, 1H, 3-CH); 7.03 (bt, *J* = 5.8, 1H, 16-NH). **<sup>13</sup>C-NMR** (CDCl<sub>3</sub>, 100 MHz): δ 12.5 (8-CH<sub>3</sub>); 13.9 (1-CH<sub>3</sub>); 18.7 (19-CH<sub>3</sub>); 18.9 (20-CH<sub>3</sub>); 22.1 (24-CH<sub>3</sub>); 22.5 (7-CH<sub>2</sub>); 28.2 (10-CH<sub>2</sub>); 28.4 (5-CH<sub>2</sub>); 28.8 (4-CH<sub>2</sub>); 29.5 (25-CH<sub>3</sub>); 31.6 (6-CH<sub>2</sub>); 32.9 (21-C); 34.8 (14-CH<sub>2</sub>); 35.9 (15-CH<sub>2</sub>); 39.7 (11-CH<sub>2</sub>); 71.5 (22-CH<sub>2</sub>); 77.2 (18-CH); 99.1

(23-C); 135.7 (2-C); 142.4 (3-CH); 170.0 (13-CO); 171.1 (17-CO); 193.7 (9-CO). **ESMS:**  $m/z$ : 457.7 [M]H<sup>+</sup>

**E-Dec-2-enoyl pantetheine acetonide 24pp**<sup>1,12,16</sup>

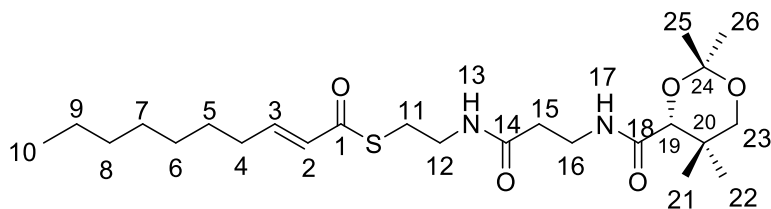

The product was obtained from **24a** as a colorless oil (0.18 g, 0.38 mmol, 38.3%), R<sub>f</sub>: 0.49 (EtAc / PE, 9:1), <sup>1</sup>H-NMR (CDCl<sub>3</sub>, 400 MHz): δ 0.88 (t, *J* = 7.6, 3H, 10-CH<sub>3</sub>); 0.97 (s, 3H, 21-CH<sub>3</sub>); 1.04 (s, 3H, 22-CH<sub>3</sub>); 1.30-1.47 (m, 10H, 5-6-7-8-9-CH<sub>2</sub>); 1.41 (s, 3H, 25-CH<sub>3</sub>); 1.46 (s, 3H, 26-CH<sub>3</sub>); 2.21 (q, *J* = 7.1, 2H, 4-CH<sub>2</sub>); 2.42 (t, *J* = 6.2, 2H, 15-CH<sub>2</sub>); 3.05 (t, *J* = 6.2, 2H, 11-CH<sub>2</sub>); 3.27 (d, *J* = 12.2, 1H, 23a-CHH); 3.39-3.62 (m, 4H, 12-16-CH<sub>2</sub>); 3.68 (d, *J* = 12.2, 1H, 23b-CHH); 4.07 (s, 1H, 19-CH); 6.08 (bt, *J* = 5.0, 1H, 13-NH); 6.77 (t, *J* = 1.9, 6.9, 1H, 3-CH); 7.03 (bt, *J* = 5.5, 1H, 17-NH). <sup>13</sup>C-NMR (CDCl<sub>3</sub>, 100 MHz): 14.0 (10-CH<sub>3</sub>); 18.7 (21-CH<sub>3</sub>); 18.9 (22-CH<sub>3</sub>); 22.1 (25-CH<sub>3</sub>); 22.6 (9-CH<sub>2</sub>); 28.4 (5-CH<sub>2</sub>); 28.5 (12-CH<sub>2</sub>); 28.8 (6-CH<sub>2</sub>); 29.1 (7-CH<sub>2</sub>); 29.5 (26-CH<sub>3</sub>); 31.8 (8-CH<sub>2</sub>); 33.2 (4-CH<sub>2</sub>); 34.8 (15-CH<sub>2</sub>); 35.9 (16-CH<sub>2</sub>); 39.7 (11-CH<sub>2</sub>); 71.5 (23-CH<sub>2</sub>); 77.2 (19-CH); 99.1 (20-C); 135.7 (2-C); 142.4 (3-CH); 170.0 (14-CO); 171.2 (18-CO); 193.7 (11-CO).

**ESMS:**  $m/z$ : 471.76 [M]H<sup>+</sup>, 493 [M + Na]<sup>+</sup>

**E-2-Methyldec-2-enoyl pantetheine acetonide 25pp**<sup>1,12,13</sup>

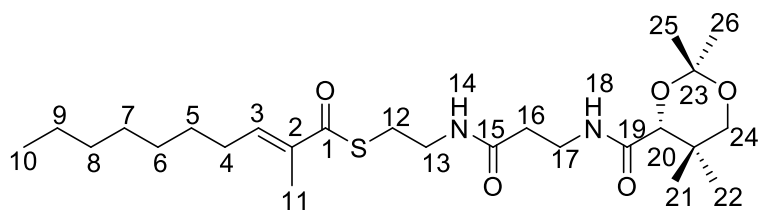

The product was obtained from **25a** as a colourless oil (0.225 g, 0.53 mmol, 63%). R<sub>f</sub>: 0.45 (EtOAc). <sup>1</sup>H-NMR (CDCl<sub>3</sub>, 400 MHz): δ 0.87 (m, 6H, 8-9-CH<sub>3</sub>); 0.97 (s, 3H, 22-CH<sub>3</sub>); 1.04 (s, 3H, 23-CH<sub>3</sub>); 1.13-1.19 (m, 2H, 7-CH<sub>3</sub>), 1.26-1.49 (m, 3H, 5-6-CH<sub>2</sub>); 1.44 (s, 3H, 25-CH<sub>3</sub>); 1.48 (s, 3H, 26-CH<sub>3</sub>); 2.34 (m, 1H, 4-CH); 2.45 (t, *J* = 5.9, 1H, 14-CH); 3.10 (t, *J* = 6.5, 2H, 11-CH<sub>2</sub>); 3.27 (d, *J* = 11.7, 1H, 21a-CHH); 3.42-3.62 (m, 4H, 12-16-CH<sub>2</sub>); 3.70 (d, *J* = 11.6, 1H, 21b-CHH); 4.09 (s, 1H, 19-CH); 6.12 (dd, *J* = 1.0, 16.0, 1H, 2-CH); 6.28 (bt, *J* = 6.3, 1H, 13-NH); 6.80 (t, *J* = 8.2, 15.8, 1H, 3-CH); 7.06 (bt, *J* = 5.8, 1H, 17-NH). <sup>13</sup>C-NMR (CDCl<sub>3</sub>, 100 MHz): δ 11.1 (8-CH<sub>3</sub>); 14.2 (9-CH<sub>3</sub>); 18.7 (22-CH<sub>3</sub>); 18.9 (23-CH<sub>3</sub>); 22.1 (25-CH<sub>3</sub>); 28.2 (11-CH<sub>2</sub>); 29.5 (26-CH<sub>3</sub>); 29.7 (7-CH<sub>2</sub>); 32.9 (6-CH); 32.9 (18-C); 34.4 (4-CH); 34.7 (15-CH<sub>2</sub>); 35.9 (16-CH<sub>2</sub>); 39.7 (12-CH<sub>2</sub>); 43.5 (5-CH); 71.5 (21-CH<sub>2</sub>); 77.2

(19-CH); 99.1 (24-C); 126.6 (2-CH); 152.1 (3-CH); 170.1 (14-CO); 171.1 (18-CO); 190.1 (1-CO).

**ESMS:**  $m/z$ : 485.7 [M]H<sup>+</sup>

### ***E*-2-Methyltetradec-2-enoyl panthetine acetonide 26pp**<sup>1,12,16</sup>

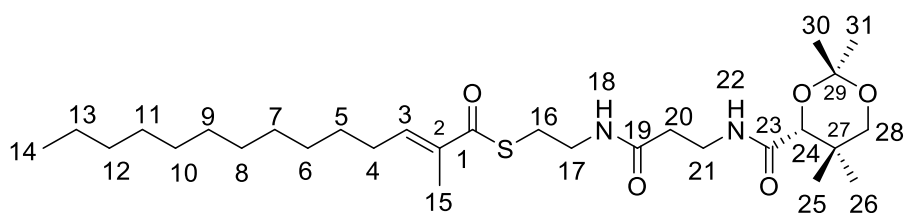

The product was obtained from **26a** as colourless solid (0.12 g, 0.22 mmol, 18.5%),  $R_f$ : 0.50 (EtOAc / PE, 9:1). **<sup>1</sup>H-NMR** (CDCl<sub>3</sub>, 400 MHz):  $\delta$  [ppm]: 0.88 (t, 3H, 14-CH<sub>3</sub>); 0.97 (s, 3H, 25-CH<sub>3</sub>); 1.04 (s, 3H, 26-CH<sub>3</sub>); 1.30-1.47 (m, 18H, 5-13-CH<sub>2</sub>); 1.41 (s, 3H, 30-CH<sub>3</sub>); 1.46 (s, 3H, 31-CH<sub>3</sub>); 1.87 (s, 3H, 15-CH<sub>3</sub>); 2.21 (q, 2H, 4-CH<sub>2</sub>); 2.42 (t, 2H, 20-CH<sub>2</sub>); 3.05 (t,  $J$  = 6.2 Hz, 2H, 16-CH<sub>2</sub>); 3.27 (d,  $J$  = 12.2 Hz, 1H, 28a-CH<sub>2</sub>); 3.39-3.62 (m, 4H, 17-21-CH<sub>2</sub>); 3.68 (d,  $J$  = 12.2 Hz, 1H, 28b-CH<sub>2</sub>); 4.07 (s, 1H, 24-CH); 6.08 (bt,  $J$  = 5.0 Hz, 1H, 18-NH); 6.77 (t, 1H, 3-CH); 7.03 (t,  $J$  = 5.5 Hz, 1H, 22-NH). **<sup>13</sup>C-NMR** (CDCl<sub>3</sub>, 100 MHz):  $\delta$ [ppm]: 12.5 (14-CH<sub>3</sub>); 14.0 (15-CH<sub>3</sub>); 18.7 (25-CH<sub>3</sub>); 18.9 (26-CH<sub>3</sub>); 22.1 (30-31-CH<sub>3</sub>); 22.6 (13-CH<sub>2</sub>); 28.5 (12-CH<sub>2</sub>); 29.1-29.9 (5-11-CH<sub>2</sub>); 31.6 (4-CH<sub>2</sub>); 34.8 (21-CH<sub>2</sub>); 39.7 (20-CH<sub>2</sub>); 71.5 (28-CH<sub>2</sub>); 77.2 (18-CH); 99.1 (29-C); 135.7 (29-C); 142.4 (2-CH); 170.0 (23-CO); 171.1 (19-CO); 193.7 (1-CO). **ESMS:**  $m/z$ : 541.3 [M]H<sup>+</sup>, 573 [M + Na]<sup>+</sup>

### ***E*-Cinnamoyl pantetheine acetonide 27pp**<sup>1,12,16</sup>

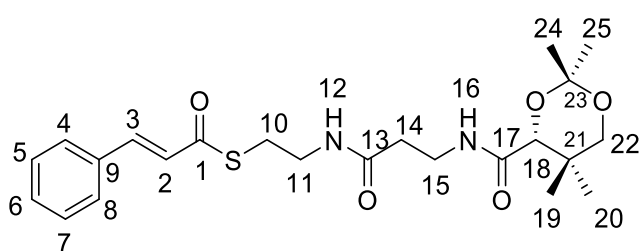

The product was obtained from cinnamic acid as a white solid (0.45, 0.73 mmol, 48.8%),  $R_f$ : 0.42 (EtOAc / PE, 9:1). **<sup>1</sup>H-NMR** (CDCl<sub>3</sub>, 400 MHz): 0.97 (s, 3H, 19-CH<sub>3</sub>); 1.04 (s, 3H, 20-CH<sub>3</sub>); 1.41 (s, 3H, 24-CH<sub>3</sub>); 1.46 (s, 3H, 25-CH<sub>3</sub>); 2.42 (t,  $J$  = 5.8, 2H, 14-CH<sub>2</sub>); 3.05 (t,  $J$  = 6.7, 2H, 10-CH<sub>2</sub>); 3.27 (d,  $J$  = 11.8, 1H, 22a-CHH); 3.39-3.62 (m, 4H, 11-15-CH<sub>2</sub>); 3.68 (d,  $J$  = 12.2, 1H, 22b-CHH); 4.07 (s, 1H, 18-CH); 6.08 (bt,  $J$  = 5.8, 1H, 12-NH); 6.70 (d, 1H, 2-CH); 7.03 (bt,  $J$  = 5.8, 1H, 16-NH), 7.73 (dd, 3H, 5-,6-,7-CH); 7.52 (m, 2H, 4-,8-CH); 7.59 (d,  $J$  = 15.82, 1H, 3-CH). **<sup>13</sup>C-NMR** (CDCl<sub>3</sub>, 100 MHz):  $\delta$  18.7 (19-CH<sub>3</sub>); 18.9 (20-CH<sub>3</sub>); 22.1 (24-CH<sub>3</sub>); 28.2 (10-CH<sub>2</sub>); 29.5 (25-CH<sub>3</sub>); 32.9 (21-C); 34.8 (14-CH<sub>2</sub>); 35.9 (15-CH<sub>2</sub>); 39.7 (11-CH<sub>2</sub>); 71.5 (22-CH<sub>2</sub>); 77.2 (18-CH); 99.1 (23-C); 123 (2-C) 127-128.5 (4-C, 5-C, 6-C, 7-C, 8-C) 135.7 (9-C); 143 (3-C), 170.0 (13-CO); 171.1 (17-CO); 193.7 (1-CO). **ESMS:**  $m/z$ : 449 [M]H<sup>+</sup>, 472 [M + Na]<sup>+</sup>



### 6*S*,4*S*-2*E*-Dimethyloct-2-enoylpantetheine **11p**<sup>15,17</sup>

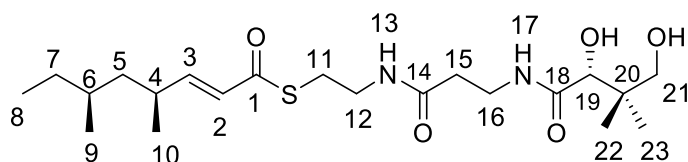

Method 2. The product was obtained from **11pp** as a yellow oil (0.16 g, 0.37 mmol, 73%),  $R_f$ : 0.42 (DCM / MeOH). **<sup>1</sup>H-NMR** (CDCl<sub>3</sub>, 400 MHz):  $\delta$  0.81-0.90 (m, 6H, 8-9-CH<sub>3</sub>), 0.92 (s, 3H, 21-CH<sub>3</sub>), 1.03 (s, 3H, 22-CH<sub>3</sub>), 1.05 (m, 3H, 10-CH<sub>3</sub>), 1.10-1.44 (m, 6H, 5-7-CH<sub>2</sub>, 6-CH), 2.42 (t, 2H,  $J = 6.0$ , 15-CH<sub>2</sub>), 2.37-2.41 (m, 1H, 4-CH), 3.03-3.17 (m, 2H, 11-CH<sub>2</sub>), 3.36-3.58 (m, 6H, 12-16-21-CH<sub>2</sub>), 3.99 (s, 1H, 19-CH), 6.08 (dd, 1H,  $J = 1.4$ ,  $J = 15.6$ , 2-CH), 6.23 (bt,  $J = 6.0$ , 1H, 13-NH), 6.79 (dd,  $J = 7.6$ , 1H, 3-CH); 7.37 (bt,  $J = 6.0$ , 1H, 17-NH). **<sup>13</sup>C-NMR** (CDCl<sub>3</sub>, 100 MHz): 11.3 (8-CH<sub>3</sub>), 18.8 (9-CH<sub>3</sub>), 20.2 (10-CH<sub>3</sub>), 20.5 (21-CH<sub>3</sub>), 21.9 (22-CH<sub>3</sub>), 28.3 (11-CH<sub>2</sub>), 29.7 (7-CH<sub>2</sub>), 31.9 (6-CH<sub>2</sub>), 34.3 (4-CH), 35.1 (15-CH<sub>2</sub>), 35.9 (16-CH<sub>2</sub>), 39.5 (18-C), 39.8 (12-CH<sub>2</sub>), 43.3 (5-CH<sub>2</sub>), 71.1 (21-CH<sub>2</sub>), 77.9 (19-CH), 126.2 (2-CH), 152.5 (3-CH), 171.8 (14-CO), 173.5 (18-CO), 190.9 (1-CO). **ESMS**:  $m/z$ : 453 [M + Na]<sup>+</sup>, 431 [M]<sup>+</sup>, 413 [M - H<sub>2</sub>O]<sup>+</sup>

### 4-*RS*-*E*-2,4-Dimethylhex-2-enoylpantetheine **18p**<sup>15,17</sup>

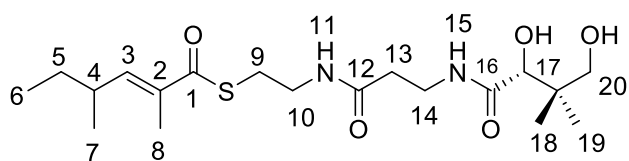

Method 2. The product was obtained from **18pp** as a colourless oil (0.22 g, 0.54 mmol, 88%).  $R_f$ : 0.42 (DCM / MeOH). **<sup>1</sup>H-NMR** (CDCl<sub>3</sub>, 400 MHz):  $\delta$  0.86 (t,  $J = 7.4$ , 3H, 6-CH<sub>3</sub>); 0.92 (s, 3H, 20-CH<sub>3</sub>); 1.03 (s, 3H, 21-CH<sub>3</sub>); 1.03 (d,  $J = 2.3$ , 3H, 7-CH<sub>3</sub>); 1.30-1.51 (m, 4H, 5-CH<sub>2</sub>); 1.88 (d,  $J = 1.1$ , 8-CH<sub>3</sub>), 2.41 (t,  $J = 5.6$ , 2H, 13-CH<sub>2</sub>); 2.40-2.49 (m, 1H, 4-CH); 2.99-3.14 (m, 2H, 9-CH<sub>2</sub>); 3.35-3.59 (m, 6H, 10-14-19-CH<sub>2</sub>); 3.99 (s, 1H, 17-CH); 6.19 (bt,  $J = 5.7$ , 1H, 11-NH); 6.54 (dq,  $J = 1$ , 3,  $J = 9.8$ , 1H, 3-CH); 7.36 (bt,  $J = 5.9$ , 1H, 15-NH). **<sup>13</sup>C-NMR** (CDCl<sub>3</sub>, 100 MHz):  $\delta$  11.9 (6-CH<sub>3</sub>), 12.7 (7-CH<sub>3</sub>), 19.5 (8-CH<sub>3</sub>), 20.4 (20-CH<sub>3</sub>); 21.7 (21-CH<sub>3</sub>); 28.3 (9-CH<sub>2</sub>); 29.6 (5-CH); 35.1 (13-CH<sub>2</sub>); 35.6 (14-CH<sub>2</sub>); 39.4 (18-C); 39.8 (10-CH<sub>2</sub>); 71.0 (19-CH<sub>2</sub>); 77.7 (17-CH); 134.4 (2-C); 147.8 (3-CH); 171.4 (11-CO); 173.3 (15-CO); 194.5 (1-COS). **ESMS**:  $m/z$ : 425 [M + Na]<sup>+</sup>, 403 [M]<sup>+</sup>, 385 [M - H<sub>2</sub>O]<sup>+</sup>

### Tigloyl-pantethine **19p**<sup>1,12,16</sup>

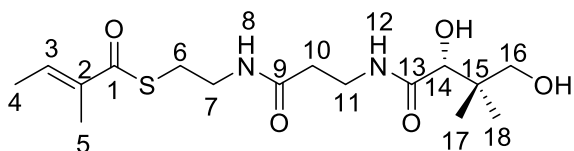

Method 1. The product was obtained from **19pp** as a colourless oil (0.167 g, 0.46 mmol, 90%),  $R_f$ : 0.44 (DCM / MeOH). **<sup>1</sup>H-NMR** (CDCl<sub>3</sub>, 400 MHz):  $\delta$  0.92 (s, 3H, 17-CH<sub>3</sub>); 0.92 (s, 3H, 18-CH<sub>3</sub>); 1.82-1.87 (m, 6H, 4-5-CH<sub>3</sub>); 2.41 (t,  $J = 5.9$ , 2H, 10-CH<sub>2</sub>); 3.01-3.10 (m, 2H, 6-CH<sub>2</sub>); 3.32-3.60 (m, 6H, 7-11-16-CH<sub>2</sub>); 3.99 (s, 1H, 14-CH); 6.33 (bt,  $J = 5.8$ , 1H, 8-NH); 6.86 (q,  $J = 1.3, 6.8$ , 1H, 3-CH); 7.40 (bt,  $J = 5.6$ , 1H, 12-NH). **<sup>13</sup>C-NMR** (CDCl<sub>3</sub>, 100 MHz):  $\delta$  12.2 (5-CH<sub>3</sub>); 14.5 (4-CH<sub>3</sub>), 20.4 (17-CH<sub>3</sub>); 21.5 (18-CH<sub>3</sub>); 28.2 (6-CH<sub>2</sub>); 35.2 (11-CH<sub>2</sub>); 35.6 (10-CH<sub>2</sub>); 39.3 (15-C); 39.9 (7-CH<sub>2</sub>); 70.9 (16-CH<sub>2</sub>); 77.9 (14-CH); 136.8 (3-C); 137.3 (2-CH); 171.8 (9-CO); 173.5 (13-CO); 194.1 (1-COS). **ESMS**:  $m/z$ : 383 [M + Na]<sup>+</sup>, 361 [M]<sup>+</sup>, 343 [M - H<sub>2</sub>O]<sup>+</sup>

### *E*-2-Methylhex-2-enoylpantetheine **20p**<sup>15,17</sup>

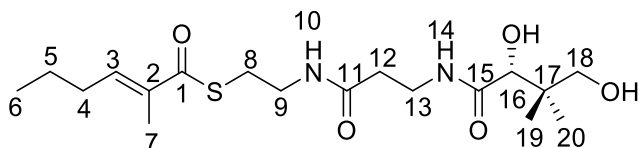

Method 2. The product was obtained from **20pp** as a colourless oil (0.2 g, 0.51 mmol, 90%).  $R_f$ : 0.44 (DCM / MeOH). **<sup>1</sup>H-NMR** (CDCl<sub>3</sub>, 400 MHz):  $\delta$  0.93 (s, 3H, 1-CH<sub>3</sub>); 0.95 (t,  $J = 7.4$ , 3H, 19-CH<sub>3</sub>); 1.02 (s, 3H, 20-CH<sub>3</sub>); 1.46-1.55 (m, 2H, 5-CH<sub>2</sub>); 1.88 (d,  $J = 1.4$ , 7-CH<sub>3</sub>); 2.20 (dq,  $J = 1.3, J = 7.0$ , 2H, 4-CH<sub>2</sub>); 2.41 (t,  $J = 5.9$ , 2H, 12-CH<sub>2</sub>); 3.00-3.13 (m, 2H, 8-CH<sub>2</sub>); 3.35-3.59 (m, 6H, 9-13-18-CH<sub>2</sub>); 3.99 (s, 1H, 16-CH); 6.23 (bt,  $J = 5.7$ , 1H, 10-NH); 6.77 (t,  $J = 1, 4, J = 7.4$ , 1H, 3-CH); 7.38 (bt,  $J = 5.9$ , 1H, 14-NH). **<sup>13</sup>C-NMR** (CDCl<sub>3</sub>, 100 MHz):  $\delta$  12.5 (6-CH<sub>3</sub>), 13.9 (7-CH<sub>3</sub>), 20.4 (19-CH<sub>3</sub>); 21.7 (20-CH<sub>3</sub>); 21.8 (5-CH<sub>2</sub>); 28.3 (8-CH<sub>2</sub>); 30.8 (4-CH<sub>2</sub>); 35.1 (12-CH<sub>2</sub>); 35.5 (13-CH<sub>2</sub>); 39.4 (17-C); 39.8 (9-CH<sub>2</sub>); 70.9 (18-CH<sub>2</sub>); 77.7 (16-CH); 135.7 (2-C); 142.5 (3-CH); 171.6 (11-CO); 173.4 (15-CO); 194.2 (1-COS). **ESMS**:  $m/z$ : 411 [M + Na]<sup>+</sup>, 389 [M]<sup>+</sup>

### 4-*RS-E*-4-Methylhex-2-enoylpantetheine **21p**<sup>15,17</sup>

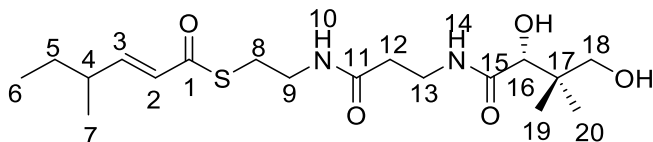

Method 2. The product was obtained from **21pp** as a colourless oil (0.19 g, 0.49 mmol, 94%).  $R_f$ : 0.46 (DCM / MeOH). **<sup>1</sup>H-NMR** (CDCl<sub>3</sub>, 400 MHz):  $\delta$  0.88 (t,  $J = 7.5$ , 3H, 6-CH<sub>3</sub>); 0.98 (s, 3H, 19-CH<sub>3</sub>); 1.01 (s, 3H, 20-CH<sub>3</sub>); 1.05 (d,  $J = 6.9$ , 7-CH<sub>3</sub>); 1.38-1.47 (m, 2H, 5-CH<sub>2</sub>); 2.19-2.27 (m, 1H, 4-CH); 2.41 (t,  $J = 5.8$ , 2H, 12-CH<sub>2</sub>); 2.94-3.15 (m, 2H, 8-CH<sub>2</sub>); 3.33-3.58 (m, 6H, 9-13-18-CH<sub>2</sub>);

4.00 (s, 1H, 16-CH); 6.08 (dd,  $J = 1.4, J = 15.4$ , 1H, 2-CH); 6.40 (bt,  $J = 5.4$ , 1H, 10-NH); 6.83 (dd,  $J = 7.4, J = 15.4$ , 1H, 3-CH); 7.40 (bt,  $J = 5.4$ , 1H, 14-NH).  $^{13}\text{C-NMR}$  ( $\text{CDCl}_3$ , 100 MHz):  $\delta$  11.6 (6-CH<sub>3</sub>), 18.7 (7-CH<sub>3</sub>), 20.4 (19-CH<sub>3</sub>); 21.7 (20-CH<sub>3</sub>); 28.2 (5-CH<sub>2</sub>); 28.8 (8-CH<sub>2</sub>); 35.1 (12-CH<sub>2</sub>); 35.8 (13-CH<sub>2</sub>); 38.2 (4-CH); 39.4 (16-C); 39.7 (9-CH<sub>2</sub>); 70.8 (18-CH<sub>2</sub>); 77.6 (16-CH); 126.7 (2-CH); 152.1 (3-CH); 171.7 (11-CO); 173.6 (15-CO); 190.8 (1-COS). **ESMS**:  $m/z$  : 411  $[\text{M} + \text{Na}]^+$ , 389  $[\text{M}]^{\text{H}^+}$

### **E-Oct-2-enoylpantetheine 22p**<sup>15,17</sup>

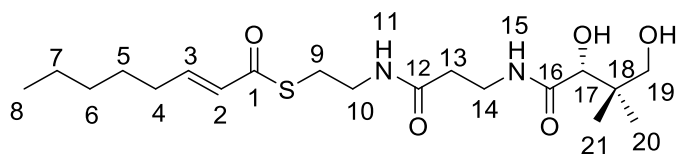

Method 2. The product was obtained from **22pp** as a colourless oil (0.17 g, 0.42 mmol, 83%).  $R_f$ : 0.45 (DCM / MeOH).  $^1\text{H-NMR}$  ( $\text{CDCl}_3$ , 400 MHz):  $\delta$  0.91 (t,  $J = 6.7$ , 3H, 8-CH<sub>3</sub>); 0.95 (s, 3H, 20-CH<sub>3</sub>); 1.06 (s, 3H, 21-CH<sub>3</sub>); 1.28-1.61 (m, 6H, 5-6-7-CH<sub>2</sub>); 2.21 (dq,  $J = 1.4, J = 7.3$ , 2H, 4-CH<sub>2</sub>); 2.43 (t,  $J = 6.0$ , 2H, 13-CH<sub>2</sub>); 3.05-3.20 (m, 2H, 9-CH<sub>2</sub>); 3.38-3.62 (m, 6H, 10-14-19-CH<sub>2</sub>); 4.01 (s, 1H, 17-CH); 6.13 (t,  $J = 4.07$ , 1H, 2-CH); 6.17 (dt,  $J = 1.4, J = 15.4$ , 1H, 11-NH); 6.96 (dt,  $J = 6, 9, J = 15.4$ , 1H, 3-CH); 7.34 (bt,  $J = 5.82$ , 1H, 15-NH).  $^{13}\text{C-NMR}$  ( $\text{CDCl}_3$ , 100 MHz):  $\delta$  13.9 (8-CH<sub>3</sub>), 20.4 (20-CH<sub>3</sub>); 21.7 (21-CH<sub>3</sub>); 22.4 (7-CH<sub>2</sub>); 27.6 (6-CH<sub>2</sub>); 28.1 (9-CH<sub>2</sub>); 31.7 (5-CH<sub>2</sub>); 32.3 (4-CH<sub>2</sub>); 35.1 (13-CH<sub>2</sub>); 35.5 (14-CH<sub>2</sub>); 39.3 (18-C); 39.9 (10-CH<sub>2</sub>); 70.9 (19-CH<sub>2</sub>); 77.8 (17-CH); 128.1 (2-CH); 147.3 (3-CH); 171.6 (12-CO); 173.2 (16-CO); 190.6 (1-CO). **ESMS**:  $m/z$ : 425  $[\text{M} + \text{Na}]^+$ , 403  $[\text{M}]^{\text{H}^+}$

### **E-2-Methyloct-2-enoylpantetheine 23p**<sup>15,17</sup>

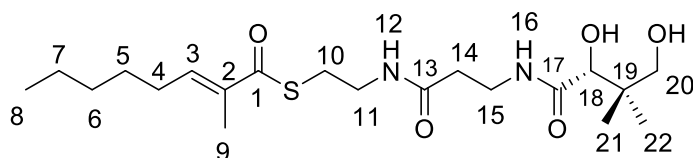

Method 2. The product was obtained from **23pp** as a yellow oil. (0.19 g; 91.2%),  $R_f$ : 0.45 (DCM / MeOH).  $^1\text{H-NMR}$  ( $\text{CDCl}_3$ , 400 MHz):  $\delta$  0.90 (t,  $J = 6.9$ , 3H, 8-CH<sub>3</sub>); 0.91 (s, 3H, 21-CH<sub>3</sub>); 1.01 (s, 3H, 22-CH<sub>3</sub>); 1.25-1.36 (m, 4H, 6-7-CH<sub>2</sub>); 1.41-1.50 (m, 2H, 5-CH<sub>2</sub>); 1.85 (s, 3H, 9-CH<sub>3</sub>); 2.20 (q,  $J = 7.5$ , 2H, 4-CH<sub>2</sub>); 2.41 (t,  $J = 6.6$ , 2H, 14-CH<sub>2</sub>); 2.99-3.12 (m, 2H, 10-CH<sub>2</sub>); 3.35-3.58 (m, 6H, 11-15-20-CH<sub>2</sub>); 3.99 (s, 1H, 18-CH); 6.37 (bt,  $J = 5.7$ , 1H, 12-NH); 6.77 (t,  $J = 1.3, J = 7.6$ , 1H, 3-CH); 7.41 (bt,  $J = 6.2$ , 1H, 16-NH).  $^{13}\text{C-NMR}$  ( $\text{CDCl}_3$ , 100 MHz):  $\delta$  12.5 (9-CH<sub>3</sub>); 14.1 (8-CH<sub>3</sub>); 20.4 (21-CH<sub>3</sub>); 21.6 (22-CH<sub>3</sub>); 22.5 (7-CH<sub>2</sub>); 28.1 (5-CH<sub>2</sub>); 28.2 (4-CH<sub>2</sub>); 28.8 (10-CH<sub>2</sub>); 31.6 (6-CH<sub>2</sub>); 35.1 (14-CH<sub>2</sub>); 35.6 (15-CH<sub>2</sub>); 39.4 (19-C); 39.8 (11-CH<sub>2</sub>); 70.9 (20-CH<sub>2</sub>); 77.8 (18-CH); 135.6 (2-C);

142.7 (3-CH); 171.7 (13-CO); 173.2 (17-CO); 194.2 (1-COS). **ESMS:**  $m/z$ : 439  $[M + Na]^+$ , 417  $[M]H^+$ , 399  $[M - H_2O]H^+$

### **E-Dec-2-enoyl-pantetheine 24p**<sup>15,17</sup>

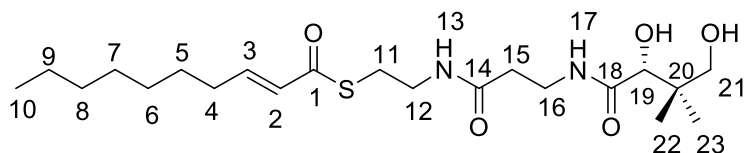

Method 2. The product was obtained from **24pp** as a colourless oil (0.16 g, 0.37 mmol, 89%).  $R_f$ : 0.48 (DCM / MeOH). **<sup>1</sup>H-NMR** (CDCl<sub>3</sub>, 400 MHz):  $\delta$  0.91 (t,  $J = 7.1$ , 3H, 10-CH<sub>3</sub>); 0.95 (s, 3H, 22-CH<sub>3</sub>); 1.06 (s, 3H, 23-CH<sub>3</sub>); 1.28-1.33 (m, 8H, 6, 7, 8, 9-CH<sub>2</sub>); 1.45-1.53 (m, 2H, 5-CH<sub>2</sub>); 2.23 (dq,  $J = 1.6$ ,  $J = 7.2$ , 2H, 4-CH<sub>2</sub>); 2.43 (t,  $J = 7.2$ , 2H, 15-CH<sub>2</sub>); 3.05-3.20 (m, 2H, 11-CH<sub>2</sub>); 3.37-3.62 (m, 6H, 12-16-21-CH<sub>2</sub>); 4.01 (s, 1H, 19-CH); 6.13 (m, 1H, 2-CH); 6.17 (dt,  $J = 1.5$ ,  $J = 15.4$ , 1H, 13-NH); 6.96 (dt,  $J = 7$ , 0,  $J = 15.5$ , 1H, 3-CH); 7.34 (bt,  $J = 6.0$ , 1H, 17-NH). **<sup>13</sup>C-NMR** (CDCl<sub>3</sub>, 100 MHz):  $\delta$  14.1 (10-CH<sub>3</sub>), 20.4 (22-CH<sub>3</sub>); 21.7 (23-CH<sub>3</sub>); 22.6 (9-CH<sub>2</sub>); 27.9 (5-CH<sub>2</sub>); 28.6 (11-CH<sub>2</sub>); 29.1 (7-CH<sub>2</sub>); 29.2 (6-CH<sub>2</sub>); 31.7 (8-CH<sub>2</sub>); 32.3 (4-CH<sub>2</sub>); 35.1 (15-CH<sub>2</sub>); 35.6 (16-CH<sub>2</sub>); 39.3 (20-C); 39.9 (12-CH<sub>2</sub>); 70.9 (21-CH<sub>2</sub>); 77.8 (19-CH); 128.1 (2-CH); 147.7 (3-CH); 171.6 (14-CO); 173.3 (18-CO); 190.9 (1-COS). **ESMS:**  $m/z$ : 453  $[M + Na]^+$ , 431  $[M]H^+$

### **E-2-Methyldec-2-enoylpantetheine 25p**<sup>1,12,16</sup>

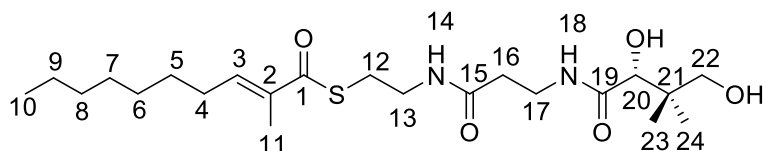

Method 1. The product was obtained from **25pp** as a colourless oil (0.01 g, 0.02 mmol, 17%).  $R_f$ : 0.48 (DCM / MeOH). **<sup>1</sup>H-NMR** (CDCl<sub>3</sub>, 400 MHz):  $\delta$  0.88 (q,  $J = 7.2$ , 3H, 10-CH<sub>3</sub>); 0.93 (s, 3H, 23-CH<sub>3</sub>); 1.04 (s, 3H, 24-CH<sub>3</sub>); 1.28-1.31 (m, 8H, 6-9-CH<sub>2</sub>); 1.43-1.48 (m, 2H, 5-CH<sub>2</sub>); 1.87 (s, 3H, 11-CH<sub>3</sub>); 2.22 (q,  $J = 7.2$ , 2H, 4-CH<sub>2</sub>); 2.41 (t,  $J = 6.2$ , 2H, 16-CH<sub>2</sub>); 3.00-3.14 (m, 2H, 12-CH<sub>2</sub>); 3.35-3.63 (m, 6H, 13-17-22-CH<sub>2</sub>); 3.99 (s, 1H, 20-CH); 6.09 (bt,  $J = 5.6$ , 1H, 14-NH); 6.78 (tq,  $J = 1.3$ ,  $J = 7.4$ , 1H, 3-CH); 7.38 (bt,  $J = 6.6$ , 1H, 18-NH). **<sup>13</sup>C-NMR** (CDCl<sub>3</sub>, 100 MHz):  $\delta$  12.5 (11-CH<sub>3</sub>); 14.1 (10-CH<sub>3</sub>); 20.4 (23-CH<sub>3</sub>); 21.7 (24-CH<sub>3</sub>); 22.6 (9-CH<sub>2</sub>); 28.3 (5-CH<sub>2</sub>); 28.5 (12-CH<sub>2</sub>); 29.1 (7-CH<sub>2</sub>); 29.4 (6-CH<sub>2</sub>); 31.8 (8-CH<sub>2</sub>); 35.1 (16-CH<sub>2</sub>); 35.6 (17-CH<sub>2</sub>); 39.4 (21-C); 39.8 (13-CH<sub>2</sub>); 70.9 (22-CH<sub>2</sub>); 77.8 (19-CH); 135.6 (2-C); 142.8 (3-CH); 171.7 (15-CO); 173.2 (19-CO); 194.2 (1-COS). **ESMS:**  $m/z$ : 467  $[M + Na]^+$ , 445  $[M]H^+$ , 427  $[M - H_2O]H^+$

### ***E*-2-Methyltetradec-2-enoylpantetheine 26p**<sup>1,12,16</sup>

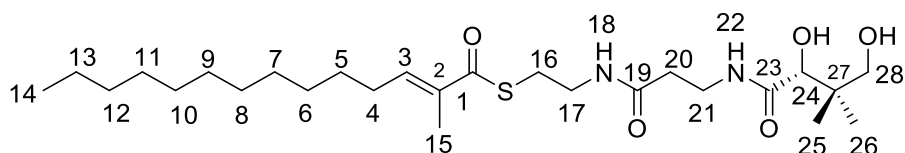

Method 1. The product was obtained from **26pp** as a colourless oil (0.01 g, 0.02 mmol, 16%),  $R_f$ : 0.3 (DCM / MeOH). **<sup>1</sup>H-NMR** (CDCl<sub>3</sub>, 400 MHz):  $\delta$  [ppm]: 0.88 (t, 3H, 14-CH<sub>3</sub>); 0.97 (s, 3H, 25-CH<sub>3</sub>); 1.04 (s, 3H, 26-CH<sub>3</sub>); 1.30-1.47 (m, 18H, 5-13-CH<sub>2</sub>); 1.87 (s, 3H, 15-CH<sub>3</sub>); 2.21 (q, 2H, 4-CH<sub>2</sub>); 2.42 (t, 2H, 20-CH<sub>2</sub>); 3.05 (t,  $J$  = 6.2 Hz, 2H, 16-CH<sub>2</sub>); 3.27 (d,  $J$  = 12.2 Hz, 1H, 28a-CH<sub>2</sub>); 3.39-3.62 (m, 4H, 17-21-CH<sub>2</sub>); 3.68 (d,  $J$  = 12.2 Hz, 1H, 28-CH<sub>2</sub>); 4.07 (s, 1H, 24-CH); 6.08 (bt,  $J$  = 5.0 Hz, 1H, 18-NH); 6.77 (t, 1H, 3-CH); 7.03 (t,  $J$  = 5.5 Hz, 1H, 22-NH). **<sup>13</sup>C-NMR** (CDCl<sub>3</sub>, 100 MHz):  $\delta$ [ppm]: 12.5 (14-CH<sub>3</sub>); 14.0 (15-CH<sub>3</sub>); 18.7 (25-CH<sub>3</sub>); 18.9 (26-CH<sub>3</sub>); 22.1 (30-31-CH<sub>3</sub>); 22.6 (13-CH<sub>2</sub>); 28.5 (12-CH<sub>2</sub>); 29.1-29.9 (5-11-CH<sub>2</sub>); 31.6 (4-CH<sub>2</sub>); 34.8 (21-CH<sub>2</sub>); 39.7 (20-CH<sub>2</sub>); 71.5 (28-CH<sub>2</sub>); 77.2 (18-CH); 142.4 (2-CH); 170.0 (23-CO); 171.1 (19-CO); 193.7 (1-CO). **ESMS**:  $m/z$ : 501.3 [M]H<sup>+</sup>, 523 [M + Na]<sup>+</sup>

### ***E*-Cinnamoyl pantetheine 27p**<sup>1,12,16</sup>

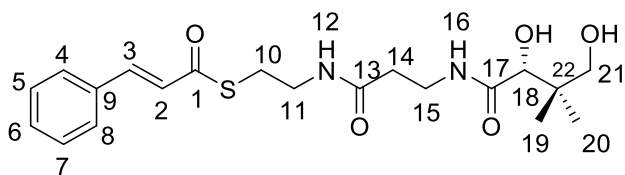

Method 1. The product was obtained from **27pp** as a colourless oil (0.03 g, 0.07 mmol, 26%),  $R_f$ : 0.5 (DCM / MeOH). **<sup>1</sup>H-NMR** (CDCl<sub>3</sub>, 400 MHz): 0.97 (s, 3H, 19-CH<sub>3</sub>); 1.04 (s, 3H, 20-CH<sub>3</sub>); 2.42 (t,  $J$  = 5.8, 2H, 14-CH<sub>2</sub>); 3.05 (t,  $J$  = 6.7, 2H, 10-CH<sub>2</sub>); 3.27 (d,  $J$  = 11.8, 1H, 21a-CHH); 3.39-3.62 (m, 4H, 11-15-CH<sub>2</sub>); 3.68 (d,  $J$  = 12.2, 1H, 21b-CHH); 4.07 (s, 1H, 18-CH); 6.08 (bt,  $J$  = 5.8, 1H, 12-NH); 6.70 (d, 1H, 2-CH); 7.03 (bt,  $J$  = 5.8, 1H, 16-NH), 7.73 (dd, 3H, 5-,6-,7-CH); 7.52 (m, 2H, 4-,8-CH); 7.59 (d,  $J$  = 15.82, 1H, 3-CH), **<sup>13</sup>C-NMR** (CDCl<sub>3</sub>, 100 MHz):  $\delta$  18.7 (19-CH<sub>3</sub>); 18.9 (20-CH<sub>3</sub>); 28.2 (10-CH<sub>2</sub>); 70.2 (21-C); 34.8 (14-CH<sub>2</sub>); 35.9 (15-CH<sub>2</sub>); 39.7 (11-CH<sub>2</sub>); 77.2 (18-CH); 48.1 (22-C); 123 (2-C) 127-128.5 (4-C, 5-C, 6-C, 7-C, 8-C) 135.7 (9-C); 143 (3-C), 170.0 (13-CO); 171.1 (17-CO); 193.7 (1-CO). **ESMS**:  $m/z$ : 432 [M + Na]<sup>+</sup>, 409 [M]H<sup>+</sup>

## 6.0 References

---

1. D. M. Roberts, C. Bartel, A. Scott, D. Ivison, T. J. Simpson and R. J. Cox, *Chem. Sci.*, 2017, **8**, 1116.
2. D. Khare, W. Hale, A. Tripathi, L. Gu, D. Sherman, W. Gerwick, K. Håkansson and J. Smith, *Structure*, 2015, **23**, 2213-2223.
3. G. Janson, C. Zhang, M. G. Prado and A. Paiardini, *Bioinformatics*, 2017, **33**, 444.
4. S. Forli, R. Huey, M. E. Pique, M. F. Sanner, D. S. Goodsell and A. J. Olson, *Nature Protocols*, 2016, **11**, 905.
5. E. Krieger, K. Joo, J. Lee, J. Lee, S. Raman, J. Thompson, M. Tyka, D. Baker and K. Karplus, *Proteins*, 2009, **77**, 114.
6. N. R. Voss and M. Gerstein, *Nucleic Acids Research*, 2010, **38**, 555-62.
7. O. Trott and A. J. Olson, *Journal of Computational Chemistry*, 2010, **31**, 455.
8. D. Seeliger and B. L. de Groot, *Journal of Computer-Aided Molecular Design*, 2010, **24**, 417.
9. S. C. Lovell, I. W. Davis, W. B. Arendall, P. I. W. de Bakker, J. M. Word, M. G. Prisant, J. S. Richardson and D. C. Richardson, *Proteins Struct. Funct. Bioinform.*, 2003, **50**, 437-450.
10. H. E. Gottlieb, V. Kotlyar and A. Nudelman, *J. Org. Chem.*, 1997, **62**, 7512.
11. L. Zheng, U. Baumann and J.-L. Reymond, *Nucleic Acids Research*, 2004, **32**, 115.
12. C. Bartel, Enzymology of Isolated functional Domains from Iterative Fungal Polyketide Synthases, Ph.D. Thesis, Leibniz University of Hannover, 2017.
13. A. L. Vagstad, A. G. Newman, P. A. Storm, K. Belecki, J. M. Crawford and C. A. Townsend, *Angewandte Chemie*, 2013, **52**, 1718.
14. N. M. Gaudelli and C. A. Townsend, *J. Org. Chem.*, 2013, **78**, 6412.
15. E. J. Skellam, D. Hurley, J. Davison, C. M. Lazarus, T. J. Simpson and R. J. Cox, *Molecular BioSystems*, 2010, **6**, 680.
16. A. C. Legon and D. J. Millen, *Chem. Soc. Rev.*, 1987, **16**, 467.
17. F. Pfengle, V. Dekaris, L. Schefzig, R. Zimmer and H.-U. Reissig, *Synlett*, 2008, 2965.
